# Supplementary material for: Improvement in the production of the human recombinant enzyme N-acetylgalactosamine-6-sulfatase (rhGALNS) in Escherichia coli using synthetic biology approaches
Source: PubMed Central journal article supplement (PMC5517531; doi:10.1038/s41598-017-06367-w), 2017-07-19

## SUPPLEMENTARY DATA

### **Improvement in the production of the human recombinant enzyme N-acetylgalactosamine-6-sulfatase (rhGALNS) in *Escherichia coli* using synthetic biology approaches**

Luis H. Reyes<sup>1,\*</sup>, Carolina Cardona<sup>1</sup>, Luisa Pimentel<sup>1</sup>, Alexander Rodríguez-López<sup>1,2</sup>, Carlos J. Alméciga-Díaz<sup>1,\*</sup>.

<sup>1</sup> Institute for the Study of Inborn Errors of Metabolism, Faculty of Science, Pontificia Universidad Javeriana, Bogotá, Colombia

<sup>2</sup> Chemistry Department, Faculty of Science, Pontificia Universidad Javeriana, Bogotá, Colombia

\* Corresponding author

**Luis H. Reyes.** Protein Expression and Purification Laboratory, Institute for the Study of Inborn Errors of Metabolism, Faculty of Science, Pontificia Universidad Javeriana, Cra 7 No 43 E 82, Building 54, Room 303A, Bogotá, Colombia. Tel.: +57 1 3208320 Ext. 4099. [luishreyesbarrios@gmail.com](mailto:luishreyesbarrios@gmail.com)

**Carlos Javier Alméciga-Díaz.** Institute for the Study of Inborn Errors of Metabolism, Faculty of Science, Pontificia Universidad Javeriana, Cra 7 No 43 E 82, Building 54, Room 303A, Bogotá, Colombia. Tel.: +57 1 3208320 Ext. 4125. [cjalmeciga@javeriana.edu.co](mailto:cjalmeciga@javeriana.edu.co)

# 1. Contents

|                                                                                                                                                                   |    |
|-------------------------------------------------------------------------------------------------------------------------------------------------------------------|----|
| 2. Plasmid maps used in this study .....                                                                                                                          | 3  |
| a. pGEX-5X-GALNSopt.....                                                                                                                                          | 3  |
| b. pGEXosmY .....                                                                                                                                                 | 7  |
| c. pGEXproUmod .....                                                                                                                                              | 10 |
| d. pACYCDuet™-1.....                                                                                                                                              | 13 |
| e. pDuet::GroS .....                                                                                                                                              | 16 |
| f. pDuet::GroL .....                                                                                                                                              | 19 |
| g. pDuet::GroSL.....                                                                                                                                              | 23 |
| h. pDuet::DnaK .....                                                                                                                                              | 27 |
| i. pDuet::DnaJ.....                                                                                                                                               | 31 |
| j. pDuet::DnaKJ.....                                                                                                                                              | 34 |
| k. pDuet::IbpA.....                                                                                                                                               | 38 |
| l. pDuet::IbpB .....                                                                                                                                              | 41 |
| m. pDuet::IbpAB .....                                                                                                                                             | 44 |
| n. pDuet::DsbA.....                                                                                                                                               | 47 |
| o. pDuet::DsbB.....                                                                                                                                               | 50 |
| p. pDuet::DsbAB.....                                                                                                                                              | 53 |
| q. pDuet::GrpE .....                                                                                                                                              | 56 |
| r. pDuet::ClpB .....                                                                                                                                              | 59 |
| 3. Non-cropped Western Blots .....                                                                                                                                | 63 |
| a. Production of rhGALNS in <i>E. coli</i> BL21(DE3) using different promoters.....                                                                               | 63 |
| b. Dynamics of the expression of rhGALNS under the control of the promoter <i>proU<sub>mod</sub></i> .....                                                        | 64 |
| c. Production of rhGALNS using the promoters <i>tac</i> and <i>proU<sub>mod</sub></i> , with two different <i>E. coli</i> strains:<br>BL21(DE3) and SHuffle®..... | 65 |
| 4. Purification via affinity chromatography.....                                                                                                                  | 66 |
| 5. Indirect Enzyme-Linked Immunosorbent Assay (ELISA) .....                                                                                                       | 67 |

## 2. Plasmid maps used in this study

### a. pGEX-5X-GALNSopt

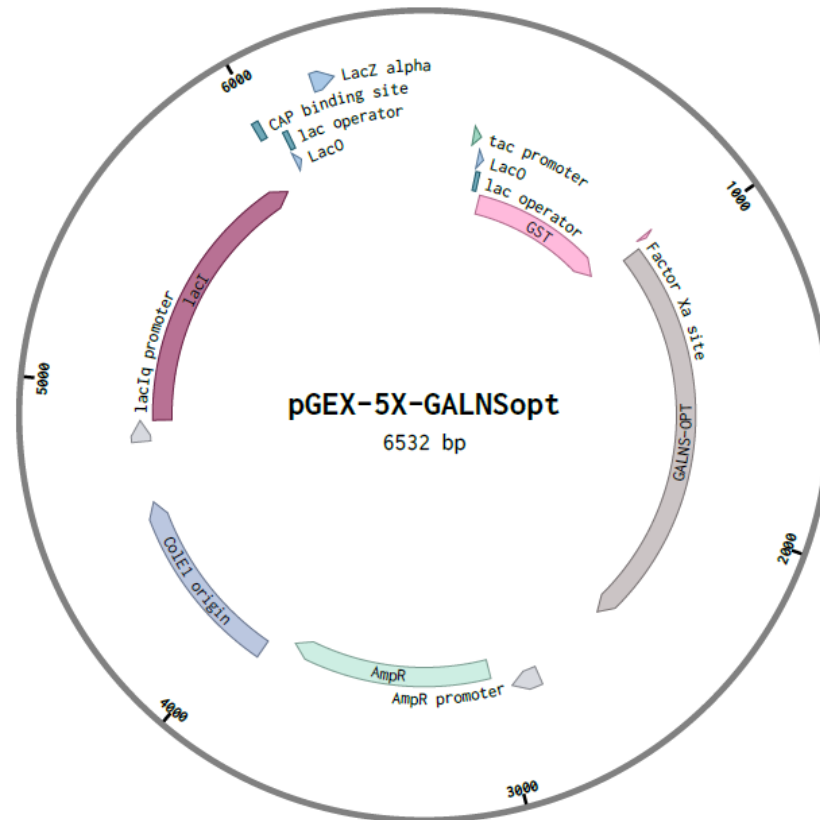

AGCTTATCGACTGCACGGTGCACCAATGCTTCTGGCGTCAGGCAGCCATCGGAAGCTGTGGT  
ATGGCTGTGCAGGTCGTAAATCACTGCATAATTCGTGTCGCTCAAGGCGCACTCCCGTTCTGG  
ATAATGTTTTTTGCGCCGACATCATAACGGTTCTGGCAAATATTCTGAAATGAGCTGTTGACA  
ATTAATCATCGGCTCGTATAATGTGTGGAATTGTGAGCGGATAACAATTCACACAGGAAAC  
AGTATTCATGTCCCCTATACTAGGTTATTGGAAAATTAAGGGCCTTGTGCAACCCACTCGACT  
TCTTTTGAATATCTTGAAGAAAATATGAAGAGCATTGTATGAGCGCGATGAAGGTGATA  
AATGGCGAAACAAAAGTTTGAATTGGGTTTGGAGTTTCCCAATCTTCCTTATTATATTGATG  
GTGATGTAAATTAACACAGTCTATGGCCATCATAACGTTATATAGCTGACAAGCACAACATG  
TTGGGTGGTTGTCCAAAAGAGCGTGCAGAGATTTCAATGCTTGAAGGAGCGGTTTTGGATAT  
TAGATACGGTGTTCGAGAATTGCATATAGTAAAGACTTTGAAACTCTCAAAGTTGATTTTCT  
TAGCAAGCTACCTGAAATGCTGAAAATGTTTCGAAGATCGTTTATGTCATAAAACATATTTAA  
ATGGTGATCATGTAACCCATCCTGACTTCATGTTGTATGACGCTCTTGATGTTGTTTTATACAT  
GGACCAATGTGCCTGGATGCGTTCCCAAATAGTTTGTTTTAAAAACGTATTGAAGCTAT  
CCCACAAATTGATAAGTACTTGAAATCCAGCAAGTATATAGCATGGCCTTTGCAGGGCTGGC  
AAGCCACGTTTGGTGGTGGCGACCATCCTCCAAAATCGGATCTGATCGAAGGTCGTGGGATC

CCCGAATTCATGGCAGCAGTTGTTGCAGCAACCCGTTGGTGGCAGCTGCTGCTGGTTCTGAG  
CGCAGCAGGTATGGGTGCAAGTGGTGCACCGCAGCCTCCGAATATTCTGCTGCTGCTGATGG  
ATGATATGGGTTGGGGTGATCTGGGTGTTTATGGTGAACCGAGCCGTGAAACCCCGAATCTG  
GATCGTATGGCAGCAGAAGGTCTGCTGTTTCCGAACTTTTATAGCGCAAATCCGCTGAGCAG  
CCCGAGCCGTGCAGCACTGCTGACAGGTCGTCTGCCGATTCGTAATGGTTTTTATAACCACCAA  
TGCACATGCACGCAATGCATATACACCGCAAGAAATTGTTGGTGGTATTCCGGATAGCGAAC  
AGCTGCTGCCGGAACCTGCTGAAAAAGCAGGTTATGTTAGCAAAATTGTGGGCAAATGGCAT  
CTGGGTCATCGTCCGCAGTTTCATCCGCTGAAACATGGTTTTGATGAATGGTTTGGTAGCCCG  
AATTGTCATTTTGGTCCGTATGATAATAAGCCCGTCCGAATATTCCGGTTTATCGTGATTGG  
GAAATGGTGGGTTCGTTATTATGAAGAATTTCCGATCAATCTGAAAACCGGTGAAGCAAATCT  
GACCCAGATTTATCTGCAAGAAGCACTGGATTTTCATTAACGTCAGGCACGTCATCATCCGTT  
TTTTCTGTATTGGGCAGTTGATGCAACCCATGCACCGGTTTATGCAAGCAAACCGTTTCTGGG  
CACCAGCCAGCGTGGTCGTTATGGTGTGATGCAGTTCGTGAAATTGATGATAGCATTGGCAAAA  
TTCTGGAACCTGCTGCAGGATCTGCATGTTGCAGATAATACCTTTGTGTTTTTACCAGCGATA  
ATGGTGCAGCACTGATTAGCGCACCGGAACAGGGTGGTAGCAATGGTCCGTTTTCTGTGTGGT  
AAACAGACCACCTTTGAAGGTGGTATGCGTGAACCGGCACTGGCATGGTGGCCTGGTCATGT  
TACCGCAGGTCAGGTTAGCCATCAGCTGGGTAGCATTATGGACCTGTTTACCACCAGTCTGG  
CACTGGCAGGTCTGACCCCTCCGAGCGATCGTGCAATTGATGGTCTGAATCTGCTGCCGACA  
CTGCTGCAGGGACGTCTGATGGATCGTCCGATTTTCTATTATCGTGGTGATACCCTGATGGCA  
GCAACCCTGGGTGAGCATAAAGCACATTTTTGGACCTGGACCAATAGCTGGGAAAATTTTCG  
TCAGGGCATTGATTTTTGTCCGGGTCAGAATGTTAGCGGTGTTACCACCATAATCTGGAAGA  
TCATACCAAACTGCCGCTGATTTTTTCATCTGGGTCGTGATCCGGGTGAACGTTTTCCGCTGAG  
CTTTGCAAGCGCAGAATATCAAGAAGCCCTGAGCCGTATTACCAGCGTTGTTTACGACGCATC  
AAGAAGCGCTGGTTCGGCACAGCCGCAGCTGAATGTTTGTAAATTGGGCAGTTATGAATTGG  
GCACCGCCTGGTTGTGAAAAACTGGGTAAATGTCTGACCCACCGGAAAGCATTCCGAAAAA  
ATGTCTGTGGTCACATTAACCTCGAGCGGCCGCATCGTGACTIONGACTGACGATCTGCCTCGCGC  
GTTTCGGTGATGACGGTGAAAACCTCTGACACATGCAGCTCCCGGAGACGGTCACAGCTTGT  
CTGTAAGCGGATGCCGGGAGCAGACAAGCCCGTCAGGGCGCGTCAGCGGGTGTGGCGGGT  
GTCGGGGCGCAGCCATGACCCAGTCACGTAGCGATAGCGGAGTGTATAATTCTTGAAGACGA  
AAGGGCCTCGTGATACGCCTATTTTTATAGGTTAATGTCATGATAATAATGGTTTCTTAGACG  
TCAGGTGGCACTTTTCGGGAAATGTGCGCGGAACCCCTATTTGTTTATTTTTCTAAATACAT  
TCAAATATGTATCCGCTCATGAGACAATAACCCTGATAAATGCTTCAATAATATTGAAAAAG  
GAAGAGTATGAGTATTCAACATTTCCGTGTCGCCCTTATTCCCTTTTTTGCGGCATTTCCTT  
CCTGTTTTTGTCTACCCAGAAACGCTGGTGAAAGTAAAGATGCTGAAGATCAGTTGGGTGC

ACGAGTGGGTACATCGAACTGGATCTCAACAGCGGTAAGATCCTTGAGAGTTTTCGCCCCG  
AAGAACGTTTTCCAATGATGAGCACTTTTAAAGTTCTGCTATGTGGCGCGGTATTATCCCGTG  
TTGACGCCGGGCAAGAGCAACTCGGTGCGCCGATACACTATTCTCAGAATGACTTGGTTGAG  
TACTCACCAGTCACAGAAAAGCATCTTACGGATGGCATGACAGTAAGAGAATTATGCAGTGC  
TGCCATAACCATGAGTGATAAACTGCGGCCAACTTACTTCTGACAACGATCGGAGGACCGA  
AGGAGCTAACCGCTTTTTTGCACAACATGGGGGATCATGTAACCTCGCCTTGATCGTTGGGAA  
CCGGAGCTGAATGAAGCCATACCAAACGACGAGCGTGACACCACGATGCCTGCAGCAATGG  
CAACAACGTTGCGCAAACCTATTAACCTGGCGAACTACTTACTCTAGCTTCCCGGCAACAATTA  
ATAGACTGGATGGAGGCGGATAAAGTTGCAGGACCACTTCTGCGCTCGGCCCTTCCGGCTGG  
CTGGTTTTATTGCTGATAAATCTGGAGCCGGTGAGCGTGGGTCTCGCGGTATCATTGCAGCACT  
GGGGCCAGATGGTAAGCCCTCCCGTATCGTAGTTATCTACACGACGGGGAGTCAGGCAACTA  
TGGATGAACGAAATAGACAGATCGCTGAGATAGGTGCCTCACTGATTAAGCATTGGTAACCTG  
TCAGACCAAGTTTACTCATATATACTTTAGATTGATTTAAACTTCATTTTTAATTTAAAAGG  
ATCTAGGTGAAGATCCTTTTTGATAATCTCATGACCAAATCCCTTAACGTGAGTTTTCGTTC  
CACTGAGCGTCAGACCCCGTAGAAAAGATCAAAGGATCTTCTTGAGATCCTTTTTTTCTGCGC  
GTAATCTGCTGCTTGCAAACAAAAAACCACCGCTACCAGCGGTGGTTTTGTTTGCCGGATCA  
AGAGCTACCAACTCTTTTTCCGAAGGTAACCTGGCTTCAGCAGAGCGCAGATACCAAATACTG  
TCCTTCTAGTGTAGCCGTAGTTAGGCCACCACTTCAAGAACTCTGTAGCACCGCCTACATAAC  
TCGCTCTGCTAATCCTGTTACCAGTGGCTGCTGCCAGTGGCGATAAGTCGTGTCTTACCGGGT  
TGGACTCAAGACGATAGTTACCGGATAAGGCGCAGCGGTGCGGGCTGAACGGGGGGTTCGTG  
CACACAGCCCAGCTTGGAGCGAACGACCTACACCGAACTGAGATACCTACAGCGTGAGCTAT  
GAGAAAGCGCCACGCTTCCCGAAGGGAGAAAGGCGGACAGGTATCCGGTAAGCGGCAGGGT  
CGGAACAGGAGAGCGCACGAGGGAGCTTCCAGGGGGAAACGCCTGGTATCTTTATAGTCCT  
GTCGGGTTTTGCCACCTCTGACTTGAGCGTCGATTTTTGTGATGCTCGTCAGGGGGGCGGAGC  
CTATGGAAAACGCCAGCAACGCGGCCTTTTTACGGTTCCTGGCCTTTTGCTGGCCTTTTGCT  
CACATGTTCTTTCCTGCGTTATCCCCTGATTCTGTGGATAACCGTATTACCGCCTTTGAGTGAG  
CTGATACCGCTCGCCGACCCGAACGACCGAGCGCAGCGAGTCAGTGAGCGAGGAAGCGGA  
AGAGCGCCTGATGCGGTATTTCTCCTTACGCATCTGTGCGGTATTTACACCCGCATAAATTC  
CGACACCATCGAATGGTGCAAACCTTTTCGCGGTATGGCATGATAGCGCCCGGAAGAGAGTC  
AATTCAGGGTGGTGAATGTGAAACCAGTAACGTTATACGATGTCGCAGAGTATGCCGGTGTCT  
TCTTATCAGACCGTTTTCCCGCGTGGTGAACCAGGCCAGCCACGTTTCTGCGAAAACGCGGGA  
AAAAGTGGAAGCGGCGATGGCGGAGCTGAATTACATTCCCAACCGCGTGGCACAACAACCTG  
GCGGGCAAACAGTCGTTGCTGATTGGCGTTGCCACCTCCAGTCTGGCCCTGCACGCGCCGTC  
GCAAATTGTGCGCGCGATTAAATCTCGCGCCGATCAACTGGGTGCCAGCGTGGTGGTGTCGA

TGGTAGAACGAAGCGGCGTCGAAGCCTGTAAAGCGGCGGTGCACAATCTTCTCGCGCAACGC  
GTCAGTGGGCTGATCATTAACTATCCGCTGGATGACCAGGATGCCATTGCTGTGGAAGCTGC  
CTGCACTAATGTTCCGGCGTTATTTCTTGATGTCTCTGACCAGACACCCATCAACAGTATTAT  
TTTCTCCCATGAAGACGGTACGCGACTGGGCGTGGAGCATCTGGTCGCATTGGGTCACCAGC  
AAATCGCGCTGTTAGCGGGCCATTAAGTTCTGTCTCGGCGCGTCTGCGTCTGGCTGGCTGGC  
ATAAATATCTCACTCGCAATCAAATTCAGCCGATAGCGGAACGGGAAGGCGACTGGAGTGCC  
ATGTCCGGTTTTTCAACAAACCATGCAAATGCTGAATGAGGGCATCGTTCCCACTGCGATGCT  
GGTTGCCAACGATCAGATGGCGCTGGGCGCAATGCGCGCCATTACCGAGTCCGGGCTGCGCG  
TTGGTGCGGATATCTCGGTAGTGGGATACGACGATACCGAAGACAGCTCATGTTATATCCCG  
CCGTTAACACCATCAAACAGGATTTTCGCCTGCTGGGGCAAACCAGCGTGGACCGCTTGCT  
GCAACTCTCTCAGGGCCAGGCGGTGAAGGGCAATCAGCTGTTGCCCGTCTCACTGGTGAAAA  
GAAAACCACCCTGGCGCCAATACGCAAACCGCCTCTCCCCGCGCGTTGGCCGATTCATTA  
ATGCAGCTGGCAGACAGGTTTCCCGACTGGAAAGCGGGCAGTGAGCGCAACGCAATTAAT  
GTGAGTTAGCTCACTCATTAGGCACCCCAGGCTTTACACTTTATGCTTCCGGCTCGTATGTTG  
TGTGGAATTGTGAGCGGATAACAATTTACACAGGAAACAGCTATGACCATGATTACGGATT  
CACTGGCCGTCGTTTTACAACGTCGTGACTGGGAAAACCCTGGCGTTACCCAACTTAATCGCC  
TTGCAGCACATCCCCCTTTCGCCAGCTGGCGTAATAGCGAAGAGGCCCGCACCGATCGCCCT  
TCCCAACAGTTGCGCAGCCTGAATGGCGAATGGCGCTTTGCCTGGTTTCCGGCACCGAAGC  
GGTGCCGAAAGCTGGCTGGAGTGCGATCTTCTGAGGCCGATACTGTGTCGTCGTCCTCCCTCAA  
ACTGGCAGATGCACGGTTACGATGCGCCCATCTACACCAACGTAACCTATCCATTACGGTC  
AATCCGCCGTTTGTTCACGGAGAATCCGACGGGTTGTTACTCGCTCACATTTAATGTTGAT  
GAAAGCTGGCTACAGGAAGGCCAGACGCGAATTATTTTTGATGGCGTTGGAATT

**b. pGEXosmY**

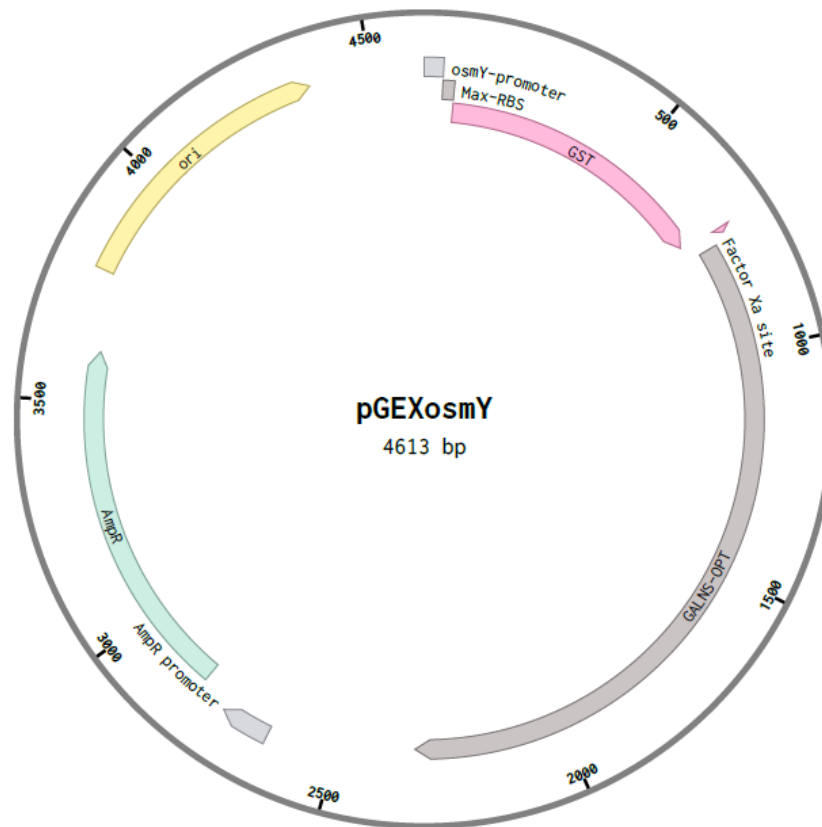

TATCCCGAGCGGTTTCAAATTGTGATCTATATTTAACAAACGAAATCAACAAAAGCGGTTA  
 CTAACATGTCCCCTATACTAGGTTATTGGAAAATTAAGGGCCTTGTGCAACCCACTCGACTTC  
 TTTTGAATATCTTGAAGAAAATATGAAGAGCATTGTATGAGCGCGATGAAGGTGATAAA  
 TGGCGAAACAAAAGTTTGAATTGGGTTTGGAGTTTCCCAATCTTCCTTATTATATTGATGGT  
 GATGTTAAATTAACACAGTCTATGGCCATCATACGTTATATAGCTGACAAGCACAACATGTT  
 GGGTGGTTGTCCAAAAGAGCGTGCAGAGATTTCAATGCTTGAAGGAGCGGTTTTGGATATTA  
 GATACGGTGTTCGAGAATTGCATATAGTAAAGACTTTGAAACTCTCAAAGTTGATTTTCTTA  
 GCAAGCTACCTGAAATGCTGAAAATGTTTGAAGATCGTTTATGTCATAAAACATATTTAAAT  
 GGTGATCATGTAACCATCCTGACTTCATGTTGTATGACGCTCTTGATGTTGTTTTATACATG  
 GACCCAATGTGCCTGGATGCGTTCCCAAATAGTTTGTTTTAAAAACGTATTGAAGCTATC  
 CCACAAATTGATAAGTACTTGAAATCCAGCAAGTATATAGCATGGCCTTTCAGGGCTGGCA  
 AGCCACGTTTGGTGGTGGCGACCATCCTCCAAAATCGGATCTGATCGAAGGTCGTGGGATCC  
 CCGAATTCGATGGCAGCAGTTGTTGCAGCAACCCGTTGGTGGCAGCTGCTGCTGGTTCTGAG  
 CGCAGCAGGTATGGGTGCAAGTGGTGCACCGCAGCCTCCGAATATTCTGCTGCTGCTGATGG  
 ATGATATGGGTTGGGGTGATCTGGGTGTTTATGGTGAACCGAGCCGTGAAACCCCGAATCTG  
 GATCGTATGGCAGCAGAAGGTCTGCTGTTTCCGAACTTTTATAGCGCAAATCCGCTGAGCAG

CCCGAGCCGTGCAGCACTGCTGACAGGTCGTCTGCCGATTCGTAATGGTTTTTATAACCACCAA  
TGCACATGCACGCAATGCATATACACCGCAAGAAATTGTTGGTGGTATTCCGGATAGCGAAC  
AGCTGCTGCCGAACTGCTGAAAAAAGCAGGTTATGTTAGCAAAATTGTGGGCAAATGGCAT  
CTGGGTCATCGTCCGCAGTTTCATCCGCTGAAACATGGTTTTGATGAATGGTTTGGTAGCCCG  
AATTGTCATTTTGGTCCGTATGATAATAAAGCCCGTCCGAATATTCCGGTTTATCGTGATTGG  
GAAATGGTGGGTCGTTATTATGAAGAATTTCCGATCAATCTGAAAACCGGTGAAGCAAATCT  
GACCCAGATTTATCTGCAAGAAGCACTGGATTTCAATAACGTCAGGCACGTCATCATCCGTT  
TTTTCTGTATTGGGCAGTTGATGCAACCCATGCACCGGTTTATGCAAGCAAACCGTTTCTGGG  
CACCAGCCAGCGTGGTCGTTATGGTGATGCAGTTCGTGAAATTGATGATAGCATTGGCAAAA  
TTCTGGAACCTGCTGCAGGATCTGCATGTTGCAGATAATACCTTTGTGTTTTTACCAGCGATA  
ATGGTGCAGCACTGATTAGCGCACCGGAACAGGGTGGTAGCAATGGTCCGTTTCTGTGTGGT  
AAACAGACCACCTTTGAAGGTGGTATGCGTGAACCGGCACTGGCATGGTGGCCTGGTCATGT  
TACCGCAGGTCAGGTTAGCCATCAGCTGGGTAGCATTATGGACCTGTTTACCACCAGTCTGG  
CACTGGCAGGTCTGACCCCTCCGAGCGATCGTGCAATTGATGGTCTGAATCTGCTGCCGACA  
CTGCTGCAGGGACGTCTGATGGATCGTCCGATTTTCTATTATCGTGGTGATACCCTGATGGCA  
GCAACCCTGGGTGAGCATAAAGCACATTTTTGGACCTGGACCAATAGCTGGGAAAATTTTCG  
TCAGGGCATTGATTTTTGTCCGGGTCAGAATGTTAGCGGTGTTACCACCCATAATCTGGAAGA  
TCATACCAAACCTGCCGCTGATTTTTTCATCTGGGTCGTGATCCGGGTGAACGTTTTCCGCTGAG  
CTTTGCAAGCGCAGAATATCAAGAAGCCCTGAGCCGTATTACCAGCGTTGTTACAGCAGCATC  
AAGAAGCGCTGGTTCGGGCACAGCCGCAGCTGAATGTTTGTAATTGGGCAGTTATGAATTGG  
GCACCGCCTGGTTGTGAAAAACTGGGTAAATGTCTGACCCACCGGAAAGCATTCCGAAAAA  
ATGTCTGTGGTCACATTAACCTCGAGCGGCCGCATCGTGACTIONACTGACGATCTGCCTCGCGC  
GTTTCGGTGATGACGGTGAAAACCTCTGACACATGCAGCTCCCGGAGACGGTCACAGCTTGT  
CTGTAAGCGGATGCCGGGAGCAGACAAGCCGTCAGGGCGCGTCAGCGGGTGTGGCGGGT  
GTCGGGGCGCAGCCATGACCCAGTCACGTAGCGATAGCGGAGTGTATAATTCTTGAAGACGA  
AAGGGCCTCGTGATACGCCTATTTTTATAGGTTAATGTCATGATAATAATGGTTTCTTAGACG  
TCAGGTGGCACTTTTCGGGAAATGTGCGCGGAACCCCTATTTGTTTATTTTTCTAAATACAT  
TCAAATATGTATCCGCTCATGAGACAATAACCCTGATAAATGCTTCAATAATATTGAAAAAG  
GAAGAGTATGAGTATTCAACATTTCCGTGTCGCCCTTATTCCCTTTTTTGCGGCATTTTGCCTT  
CCTGTTTTTGCTCACCCAGAAACGCTGGTGAAAGTAAAAGATGCTGAAGATCAGTTGGGTGC  
ACGAGTGGGTTACATCGAACTGGATCTCAACAGCGGTAAGATCCTTGAGAGTTTTCGCCCCG  
AAGAACGTTTTCCAATGATGAGCACTTTTAAAGTTCTGCTATGTGGCGCGGTATTATCCCGTG  
TTGACGCCGGGCAAGAGCAACTCGGTGCGCGCATACTACTATTCTCAGAATGACTTGGTTGAG  
TACTCACCAGTCACAGAAAAGCATCTTACGGATGGCATGACAGTAAGAGAATTATGCAGTGC



TGCCATAACCATGAGTGATAAACTGCGGCCAACTTACTTCTGACAACGATCGGAGGACCGA  
AGGAGCTAACCGCTTTTTTGCACAACATGGGGGATCATGTAACCTCGCCTTGATCGTTGGGAA  
CCGGAGCTGAATGAAGCCATAACCAAACGACGAGCGTGACACCACGATGCCTGCAGCAATGG  
CAACAACGTTGCGCAAACCTATTAACCTGGCGAACTACTTACTCTAGCTTCCCGGCAACAATTA  
ATAGACTGGATGGAGGGCGGATAAAGTTGCAGGACCACTTCTGCGCTCGGCCCTTCCGGCTGG  
CTGGTTTATTGCTGATAAATCTGGAGCCGGTGAGCGTGGGTCTCGCGGTATCATTGCAGCACT  
GGGGCCAGATGGTAAGCCCTCCCGTATCGTAGTTATCTACACGACGGGGAGTCAGGCAACTA  
TGGATGAACGAAATAGACAGATCGCTGAGATAGGTGCCTCACTGATTAAGCATTGGTAAC TG  
TCAGACCAAGTTTACTCATATATACTTTAGATTGATTTAAACTTCATTTTTAATTTAAAAGG  
ATCTAGGTGAAGATCCTTTTTGATAATCTCATGACCAAATCCCTTAACGTGAGTTTTTCGTTC  
CACTGAGCGTCAGACCCCGTAGAAAAGATCAAAGGATCTTCTTGAGATCCTTTTTTTCTGCGC  
GTAATCTGCTGCTTGCAAACAAAAAACCACCGCTACCAGCGGTGGTTTGTTCGCGGATCA  
AGAGCTACCAACTCTTTTTCCGAAGGTAACCTGGCTTCAGCAGAGCGCAGATACCAAATACTG  
TCCTTCTAGTGTAGCCGTAGTTAGGCCACCACTTCAAGAACTCTGTAGCACCGCCTACATACC  
TCGCTCTGCTAATCCTGTTACCAGTGGCTGCTGCCAGTGGCGATAAGTCGTGTCTTACCGGGT  
TGGACTCAAGACGATAGTTACCGGATAAAGGCGCAGCGGTTCGGGCTGAACGGGGGGTTCGTG  
CACACAGCCCAGCTTGGAGCGAACGACCTACACCGAACTGAGATACCTACAGCGTGAGCTAT  
GAGAAAGCGCCACGCTTCCCGAAGGGAGAAAGGCGGACAGGTATCCGGTAAGCGGCAGGGT  
CGGAACAGGAGAGCGCACGAGGGAGCTTCCAGGGGGAAACGCCTGGTATCTTTATAGTCCT  
GTCGGGTTTCGCCACCTCTGACTTGAGCGTCGATTTTTGTGATGCTCGTCAGGGGGGCGGAGC  
CTATGGAAAAACGCCAGCAACGCGGCCTTTTTACGGTTCCTGGCCTTTTGCTGGCCTTTTGCT  
CACATGTTCTTTCTGCGTTATCCCCTGATTCTGTGGATAACCGTATTACCGCCTTTGAGTGAG  
CTGATACCGCTCGCCGCAGCCGAACGACCGAGCGCAGCGAGTCAGTGAGCGAGGAAGCGGA  
AGAGCGCCTGATGCGGTATTTTCTCCTTACGCATCTGTGCGGTATTTACACCCGCATAAATTC  
C

c. pGEXproUmod

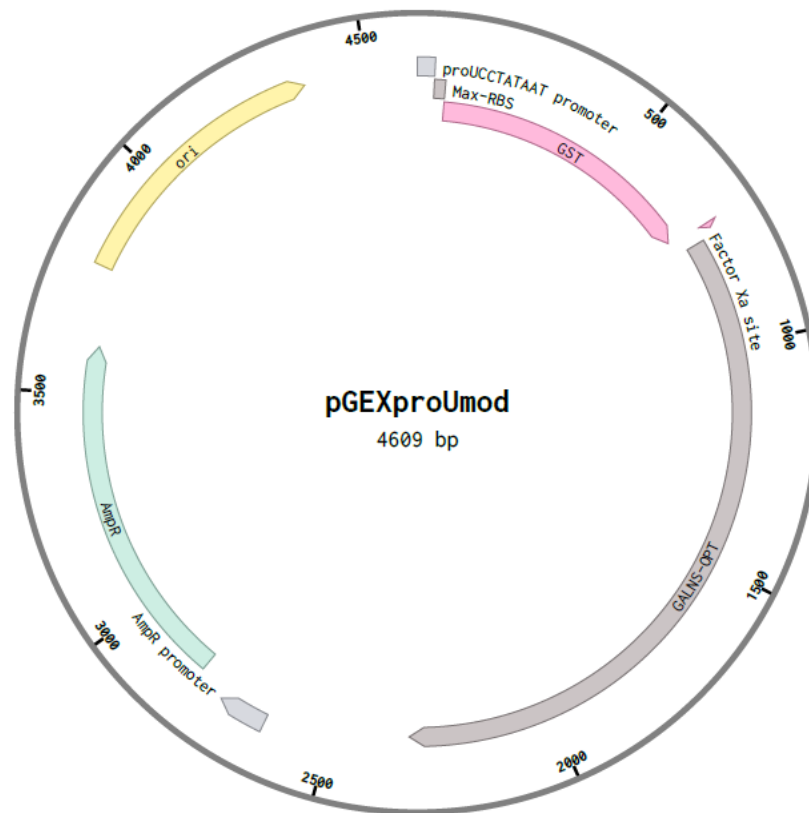

GGGGCCGCCTCAGATTCTCAGTATGTTATAATAGAAAAGCGAACGGAAATCTACGGTTAACA  
TATGTCCCCTATACTAGGTTATTGGAAAATTAAGGGCCTTGTGCAACCCACTCGACTTCTTTT  
GGAATATCTTGAAGAAAATATGAAGAGCATTGTATGAGCGCGATGAAGGTGATAAATGG  
CGAAACAAAAAGTTTGAATTGGGTTTGGAGTTTCCCAATCTTCCTTATTATATTGATGGTGAT  
GTAAATTAACACAGTCTATGGCCATCATAACGTTATATAGCTGACAAGCACAACATGTTGGG  
TGGTTGTCCAAAAGAGCGTGCAGAGATTTCAATGCTTGAAGGAGCGGTTTTGGATATTAGAT  
ACGGTGTTCGAGAATTGCATATAGTAAAGACTTTGAAACTCTCAAAGTTGATTTTCTTAGCA  
AGCTACCTGAAATGCTGAAAATGTTTCGAAGATCGTTTATGTCATAAAACATATTTAAATGGT  
GATCATGTAACCCATCCTGACTTCATGTTGTATGACGCTCTTGATGTTGTTTTATACATGGAC  
CCAATGTGCCTGGATGCGTTCCCAAATTAGTTTGTTTTAAAAAACGTATTGAAGCTATCCCA  
CAAATTGATAAGTACTTGAAATCCAGCAAGTATATAGCATGGCCTTTGCAGGGCTGGCAAGC  
CACGTTTGGTGGTGGCGACCATCCTCCAAAATCGGATCTGATCGAAGGTCGTGGGATCCCCG  
AATTCGATGGCAGCAGTTGTTGCAGCAACCCGTTGGTGGCAGCTGCTGCTGGTTCTGAGCGC  
AGCAGGTATGGGTGCAAGTGGTGCACCCGAGCCTCCGAATATTCTGCTGCTGCTGATGGATG  
ATATGGGTTGGGGTGATCTGGGTGTTTATGGTGAACCGAGCCGTGAAACCCCGAATCTGGAT  
CGTATGGCAGCAGAAGGTCTGCTGTTTCCGAACCTTTATAGCGCAAATCCGCTGAGCAGCCC

GAGCCGTGCAGCACTGCTGACAGGTCGTCTGCCGATTTCGTAATGGTTTTTATAACCACCAATGC  
ACATGCACGCAATGCATATACACCGCAAGAAATTGTTGGTGGTATTCCGGATAGCGAACAGC  
TGCTGCCGGAAGTCTGAAAAAAGCAGGTTATGTTAGCAAAATTGTGGGCAAATGGCATCTG  
GGTCATCGTCCGCAGTTTCATCCGCTGAAACATGGTTTTGATGAATGGTTTGGTAGCCCGAAT  
TGTCATTTTGGTCCGTATGATAATAAAGCCCGTCCGAATATTCCGGTTTATCGTGATTGGGAA  
ATGGTGGGTTCGTTATTATGAAGAATTTCCGATCAATCTGAAAACCGGTGAAGCAAATCTGAC  
CCAGATTTATCTGCAAGAAGCACTGGATTTTATTAAACGTCAGGCACGTCATCATCCGTTTTT  
TCTGTATTGGGCAGTTGATGCAACCCATGCACCGGTTTATGCAAGCAAACCGTTTTCTGGGCAC  
CAGCCAGCGTGGTCGTTATGGTGATGCAGTTCGTGAAATTGATGATAGCATTGGCAAATTC  
TGGAAGTCTGTCAGGATCTGCATGTTGCAGATAATACCTTTGTGTTTTTCACCAGCGATAATG  
GTGCAGCACTGATTAGCGCACCGGAACAGGGTGGTAGCAATGGTCCGTTTCTGTGTGGTAAA  
CAGACCACCTTTGAAGGTGGTATGCGTGAACCGGCACTGGCATGGTGGCCTGGTCATGTTAC  
CGCAGGTCAGGTTAGCCATCAGCTGGGTAGCATTATGGACCTGTTTACCACCAGTCTGGCAC  
TGGCAGGTCTGACCCCTCCGAGCGATCGTGCAATTGATGGTCTGAATCTGCTGCCGACACTG  
CTGCAGGGACGTCTGATGGATCGTCCGATTTTCTATTATCGTGGTGATACCCTGATGGCAGCA  
ACCCTGGGTCAGCATAAAGCACATTTTTTGGACCTGGACCAATAGCTGGGAAAATTTTCGTCA  
GGGCATTGATTTTTGTCCGGGTCAGAATGTTAGCGGTGTTACCACCCATAATCTGGAAGATCA  
TACCAAAGTCCGCTGATTTTTTTCATCTGGGTTCGTGATCCGGGTGAACGTTTTCCGCTGAGCTT  
TGCAAGCGCAGAATATCAAGAAGCCCTGAGCCGTATTACCAGCGTTGTTTCAGCAGCATCAAG  
AAGCGCTGGTTCGGGCACAGCCGACGCTGAATGTTTGTAATTGGGCAGTTATGAATTGGGCA  
CCGCTGGTTGTGAAAAACTGGGTAAATGTCTGACCCACCGGAAAGCATTCCGAAAAAATG  
TCTGTGGTCACATTAAGTTCGAGCGGCCGCATCGTGACTGACTGACGATCTGCCTCGCGGTTT  
CGGTGATGACGGTGAAAACCTCTGACACATGCAGCTCCCGGAGACGGTCACAGCTTGTCTGT  
AAGCGGATGCCGGGAGCAGACAAGCCCGTCAGGGCGCGTCAGCGGGTGTGGCGGGTGTGCG  
GGGCGCAGCCATGACCCAGTCACGTAGCGATAGCGGAGTGTATAATTCTTGAAGACGAAAG  
GGCCTCGTGATACGCCTATTTTTATAGGTTAATGTCATGATAATAATGGTTTCTTAGACGTCA  
GGTGGCACTTTTCGGGAAATGTGCGCGGAACCCCTATTTGTTTATTTTTCTAAATACATTCA  
AATATGTATCCGCTCATGAGACAATAACCCTGATAAATGCTTCAATAATATTGAAAAAGGAA  
GAGTATGAGTATTCAACATTTCCGTGTCGCCCTTATCCCTTTTTTGCGGCATTTTGCCTTCCT  
GTTTTTGCTACCCAGAAACGCTGGTGAAGTAAAAGATGCTGAAGATCAGTTGGGTGCACG  
AGTGGGTTACATCGAACTGGATCTCAACAGCGGTAAGATCCTTGAGAGTTTTCGCCCCGAAG  
AACGTTTTCCAATGATGAGCACTTTTAAAGTTCTGCTATGTGGCGCGGTATTATCCCGTGTG  
ACGCCGGGCAAGAGCAACTCGGTGCGCCGATACACTATTCTCAGAATGACTTGGTTGAGTAC  
TCACCAGTCACAGAAAAGCATCTTACGGATGGCATGACAGTAAGAGAATTATGCAGTGCTGC

CATAACCATGAGTGATAAACACTGCGGCCAACTTACTTCTGACAACGATCGGAGGACCGAAGG  
AGCTAACCGCTTTTTTGCACAACATGGGGGATCATGTAACCTGCCTTGATCGTTGGGAACCG  
GAGCTGAATGAAGCCATACCAAACGACGAGCGTGACACCACGATGCCTGCAGCAATGGCAA  
CAACGTTGCGCAAACCTATTAACCTGGCGAACTACTTACTCTAGCTTCCCGGCAACAATTAATA  
GACTGGATGGAGGCGGATAAAGTTGCAGGACCACTTCTGCGCTCGGCCCTTCCGGCTGGCTG  
GTTTATTGCTGATAAATCTGGAGCCGGTGAGCGTGGGTCTCGCGGTATCATTGCAGCACTGG  
GGCCAGATGGTAAGCCCTCCCGTATCGTAGTTATCTACACGACGGGGAGTCAGGCAACTATG  
GATGAACGAAATAGACAGATCGCTGAGATAGGTGCCTCACTGATTAAGCATTGGTAACTGTC  
AGACCAAGTTTACTCATATATACTTTAGATTGATTTAAAACCTCATTTTTAATTTAAAAGGAT  
CTAGGTGAAGATCCTTTTTGATAATCTCATGACCAAATCCCTTAACGTGAGTTTTCGTTCCA  
CTGAGCGTCAGACCCCGTAGAAAAGATCAAAGGATCTTCTTGAGATCCTTTTTTTCTGCGCGT  
AATCTGCTGCTTGCAAACAAAAAACCACCGCTACCAGCGGTGGTTTGTGGCCGGATCAAG  
AGCTACCAACTCTTTTTCCGAAGGTAACCTGGCTTCAGCAGAGCGCAGATACCAAATACTGTC  
CTTCTAGTGTAGCCGTAGTTAGGCCACCACTTCAAGAACTCTGTAGCACCGCCTACATACCTC  
GCTCTGCTAATCCTGTTACCAGTGGCTGCTGCCAGTGGCGATAAGTCGTGTCTTACCGGGTTG  
GACTCAAGACGATAGTTACCGGATAAAGGCGCAGCGGTCTGGGCTGAACGGGGGGTTCGTGCA  
CACAGCCCAGCTTGGAGCGAACGACCTACACCGAACTGAGATACCTACAGCGTGAGCTATGA  
GAAAGCGCCACGCTTCCCGAAGGGAGAAAGGCGGACAGGTATCCGGTAAGCGGCAGGGTGC  
GAACAGGAGAGCGCACGAGGGAGCTTCCAGGGGGAAACGCCTGGTATCTTTATAGTCCTGTC  
GGGTTTCGCCACCTCTGACTTGAGCGTCGATTTTTGTGATGCTCGTCAGGGGGGCGGAGCCTA  
TGAAAAACGCCAGCAACGCGGCCTTTTTACGGTTCCTGGCCTTTTGCTGGCCTTTTGCTCAC  
ATGTTCTTTCCTGCGTTATCCCCTGATTCTGTGGATAACCGTATTACCGCCTTTGAGTGAGCTG  
ATACCGCTCGCCGCAGCCGAACGACCGAGCGCAGCGAGTCAGTGAGCGAGGAAGCGGAAGA  
GCGCCTGATGCGGTATTTTCTCCTTACGCATCTGTGCGGTATTTACACCCGCATAAATTCC

d. pACYCDuet™-1

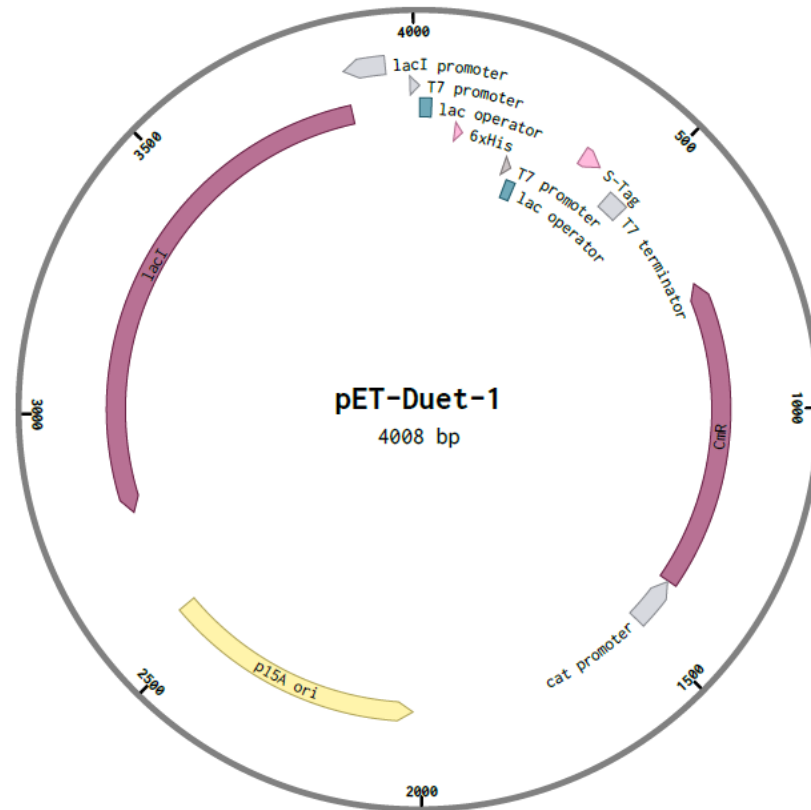

GGGAATTGTGAGCGGATAACAATTCCTGTAGAAATAATTTTGTTTAACTTTAATAAGGA  
 GATATACCATGGGCAGCAGCCATCACCATCATCACCACAGCCAGGATCCGAATTCGAGCTCG  
 GCGCGCCTGCAGGTCGACAAGCTTGCGGCCGATAATGCTTAAGTCGAACAGAAAGTAATCG  
 TATTGTACACGGCCGATAATCGAAATTAATACGACTCACTATAGGGGAATTGTGAGCGGAT  
 AACAAATCCCCATCTTAGTATATTAGTTAAGTATAAGAAGGAGATATACATATGGCAGATCT  
 CAATTGGATATCGGCCGGCCACGCGATCGCTGACGTCGGTACCCTCGAGTCTGGTAAAGAAA  
 CCGCTGCTGCGAAATTTGAACGCCAGCACATGGACTCGTCTACTAGCGCAGCTTAATTAACC  
 TAGGCTGCTGCCACCGCTGAGCAATAACTAGCATAACCCCTTGGGGCCTCTAAACGGGTCTT  
 GAGGGGTTTTTTGCTGAAACCTCAGGCATTTGAGAAGCACACGGTCACACTGCTTCCGGTAG  
 TCAATAAACCGGTAAACCAGCAATAGACATAAGCGGCTATTTAACGACCCTGCCCTGAACCG  
 ACGACCGGGTCAATTTGCTTTCGAATTTCTGCCATTCATCCGCTTATTATCACTTATTCAGGC  
 GTAGCACCAGGCGTTTAAGGGCACCAATAACTGCCTTAAAAAATTACGCCCCGCCCTGCCA  
 CTCATCGCAGTACTGTTGTAATTCATTAAGCATTCTGCCGACATGGAAGCCATCACAGACGG  
 CATGATGAACCTGAATCGCCAGCGGCATCAGCACCTTGTCGCCTTGCGTATAATATTTGCCCA  
 TAGTGAAAACGGGGGCGAAGAAGTTGTCCATATTGGCCACGTTTAAATCAAACCTGGTGAAA  
 CTCACCCAGGGATTGGCTGAGACGAAAAACATATTCTCAATAAACCTTTAGGGAAATAGGC

CAGGTTTTACCGTAACACGCCACATCTTGCGAATATATGTGTAGAAACTGCCGGAATCGT  
CGTGGTATTCACTCCAGAGCGATGAAAACGTTTCAGTTTGCTCATGGAAAACGGTGTAAACA  
GGGTGAACACTATCCCATATCACCAGCTCACCCTTTTCATTGCCATACGGAACCTCCGGATGA  
GCATTCATCAGGCGGGCAAGAATGTGAATAAAGGCCGGATAAAACTTGTGCTTATTTTTCTTT  
ACGGTCTTTAAAAAGGCCGTAATATCCAGCTGAACGGTCTGGTTATAGGTACATTGAGCAAC  
TGACTGAAATGCCTCAAATGTTCTTTACGATGCCATTGGGATATATCAACGGTGGTATATCC  
AGTGATTTTTTTCTCCATTTTAGCTTCCTTAGCTCCTGAAAATCTCGATAACTCAAAAAATAC  
GCCCAGTAGTGATCTTATTTTATTATGGTGAAAGTTGGAACCTTTACGTGCCGATCAACGTC  
TCATTTTCGCCAAAAGTTGGCCCAGGGCTTCCCAGGATCAACAGGGACACCAGGATTTATTTA  
TTCTGCGAAGTGATCTTCCGTCACAGGTATTTATTCGGCGCAAAGTGCGTCCGGGTGATGCTGC  
CAACTTACTGATTTAGTGTATGATGGTGTTTTTGAGGTGCTCCAGTGGCTTCTGTTTCTATCAG  
CTGTCCCTCCTGTTTACGCTACTGACGGGGTGGTGCCTAACGGCAAAGCACCAGCCGGACATC  
AGCGCTAGCGGAGTGTATACTGGCTTACTATGTTGGCACTGATGAGGGTGTGAGTGAAGTGC  
TTCATGTGGCAGGAGAAAAAGGCTGCACCGGTGCGTCAGCAGAATATGTGATACAGGATA  
TATTCGCTTCTCGCTCACTGACTCGCTACGCTCGGTCGTTTCGACTGCGGGCAGCGGAAATG  
GCTTACGAACGGGGCGGAGATTTCTGGAAGATGCCAGGAAGATACTTAACAGGGGAAGTGA  
GAGGGCCCGGGCAAAGCCGTTTTTCCATAGGCTCCGCCCCCTGACAAGCATCACGAAATCT  
GACGCTCAAATCAGTGGTGGCGAAACCCGACAGGACTATAAAGATACCAGGCGTTTCCCCTG  
GCGGCTCCCTCGTGCGCTCTCCTGTTTCTGCTTTTCGGTTTACCGGTGTCATTCCGCTGTTATG  
GCCGCGTTTGTCTCATTCCACGCCTGACACTCAGTTCGGGTAGGCAGTTCGCTCCAAGCTGG  
ACTGTATGCACGAACCCCCGTTTACGTCGACCGCTGCGCCTTATCCGGTAACTATCGTCTTG  
AGTCCAACCCGAAAGACATGCAAAGCACCCTGGCAGCAGCCACTGGTAATTGATTTAG  
AGGAGTTAGTCTTGAAGTCATGCGCCGGTTAAGGCTAAACTGAAAGGACAAGTTTTGGTGAC  
TGCGCTCCTCCAAGCCAGTTACCTCGGTTCAAAGAGTTGGTAGCTCAGAGAACCTTCGAAAA  
ACCGCCCTGCAAGGCGGTTTTTTTCGTTTTTCAGAGCAAGAGATTACGCGCAGACCAAAACGAT  
CTCAAGAAGATCATCTTATTAATCAGATAAAATATTTCTAGATTTTACGTGCAATTTATCTCTT  
CAAATGTAGCACCTGAAGTCAGCCCATACGATATAAGTTGTAATTCTCATGTTAGTCATGCC  
CCGCGCCACCGGAAGGAGCTGACTGGGTTGAAGGCTCTCAAGGGCATCGGTCGAGATCCCG  
GTGCCTAATGAGTGAGCTAACTTACATTAATTGCGTTGCGCTCACTGCCCGCTTTCCAGTCGG  
GAAACCTGTCGTGCCAGCTGCATTAATGAATCGGCCAACGCGCGGGGAGAGGCGGTTTTGCGT  
ATTGGGCGCCAGGGTGGTTTTTTCTTTTACCAGTGAGACGGGCAACAGCTGATTGCCCTTAC  
CGCTGGCCCTGAGAGAGTTGCAGCAAGCGGTCCACGCTGGTTTGCCCCAGCAGGCGAAAAT  
CCTGTTTGATGGTGGTTAACGGCGGGATATAACATGAGCTGTCTTCGGTATCGTCGTATCCCA  
CTACCGAGATGTCCGCACCAACGCGCAGCCCGGACTCGGTAATGGCGCGCATTGCGCCCAGC

GCCATCTGATCGTTGGCAACCAGCATCGCAGTGGGAACGATGCCCTCATTTCAGCATTTGCAT  
GGTTTGTGAAAACCGGACATGGCACTCCAGTCGCCTTCCCGTTCGCTATCGGCTGAATTTG  
ATTGCGAGTGAGATATTTATGCCAGCCAGCCAGACGCAGACGCGCCGAGACAGAACTTAATG  
GGCCCGCTAACAGCGCGATTTGCTGGTGACCCAATGCGACCAGATGCTCCACGCCAGTCGC  
GTACCGTCTTCATGGGAGAAAATAATACTGTTGATGGGTGTCTGGTCAGAGACATCAAGAAA  
TAACGCCGGAACATTAGTGCAGGCAGCTTCCACAGCAATGGCATCCTGGTCATCCAGCGGAT  
AGTTAATGATCAGCCACTGACGCGTTGCGCGAGAAGATTGTGCACCGCCGCTTTACAGGCT  
TCGACGCCGCTTCGTTCTACCATCGACACCACCACGCTGGCACCCAGTTGATCGGCGCGAGA  
TTTAATCGCCGCGACAATTTGCGACGGCGCGTGCAGGGCCAGACTGGAGGTGGCAACGCCAA  
TCAGCAACGACTGTTTGCCCGCCAGTTGTTGTGCCACGCGGTTGGGAATGTAATTCAGCTCCG  
CCATCGCCGCTTCCACTTTTTCCCGCGTTTTTCGCAGAAACGTGGCTGGCCTGGTTCACCACGC  
GGGAAACGGTCTGATAAGAGACACCGGCATACTCTGCGACATCGTATAACGTTACTGGTTTC  
ACATTCACCACCCTGAATTGACTCTCTTCCGGGCGCTATCATGCCATAACCGCGAAAGGTTTTG  
CGCCATTCGATGGTGTCCGGGATCTCGACGCTCTCCCTTATGCGACTCCTGCATTAGGAAATT  
AATACGACTCACTATA

e. pDuet::GroS

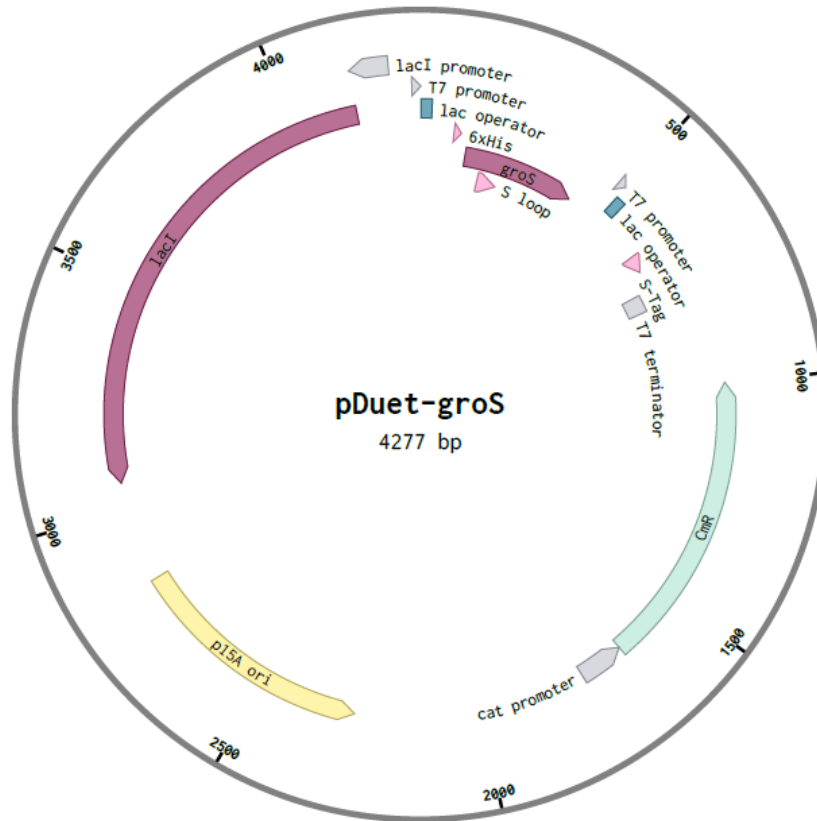

GGGAATTGTGAGCGGATAACAATCCCCTGTAGAAATAATTTTGTTTAACTTTAATAAGGA  
GATATACCATGGGCAGCAGCCATCACCATCATCACCACAGCCAGGATCCGAATTCATGAATA  
TTCGTCCATTGCATGATCGCGTGATCGTCAAGCGTAAAGAAGTTGAAACTAAATCTGCTGGC  
GGCATCGTTCTGACCGGCTCTGCAGCGGCTAAATCCACCCGCGGCGAAGTGCTGGCTGTCGG  
CAATGGCCGTATCCTTGAAAATGGCGAAGTGAAGCCGCTGGATGTGAAAGTTGGCGACATCG  
TTATTTTCAACGATGGCTACGGTGTGAAATCTGAGAAGATCGACAATGAAGAAGTGTTGATC  
ATGTCCGAAAGCGACATTCTGGCAATTGTTGAAGCGTAAAAGCTTGCGGCCGCATAATGCTT  
AAGTCGAACAGAAAGTAATCGTATTGTACACGGCCGCATAATCGAAATTAATACGACTCACT  
ATAGGGGAATTGTGAGCGGATAACAATCCCATCTTAGTATATTAGTTAAGTATAAGAAGG  
AGATATACATATGGCAGATCTCAATTGGATATCGGCCGGCCACGCGATCGCTGACGTCGGTA  
CCCTCGAGTCTGGTAAAGAAACCGCTGCTGCGAAATTTGAACGCCAGCACATGGACTCGTCT  
ACTAGCGCAGCTTAATTAACCTAGGCTGCTGCCACCGCTGAGCAATAACTAGCATAAACCCT  
TGGGGCTCTAAACGGGTCTTGAGGGGTTTTTTGCTGAAACCTCAGGCATTTGAGAAGCACA  
CGGTCACTGCTTCCGGTAGTCAATAAACCGGTAAACCAGCAATAGACATAAGCGGCTATT  
TAACGACCCTGCCCTGAACCGACGACCGGGTTCGAATTTGCTTTCGAATTTCTGCCATTCATCC  
GCTTATTATCACTTATTCAGGCGTAGCACCAGGCGTTTAAGGGCACCAATAACTGCCTTAAA



AAAATTACGCCCCGCCCTGCCACTCATCGCAGTACTGTTGTAATTCATTAAGCATTCTGCCGA  
CATGGAAGCCATCACAGACGGCATGATGAACCTGAATCGCCAGCGGCATCAGCACCTTGTCG  
CCTTGCGTATAATATTTGCCCATAGTGAAAACGGGGGCGAAGAAGTTGTCCATATTGGCCAC  
GTTTAAATCAAACTGGTGAAACTCACCCAGGGATTGGCTGAGACGAAAAACATATTCTCAA  
TAAACCCTTTAGGGAAATAGGCCAGGTTTTACCGTAACACGCCACATCTTGCGAATATATG  
TGTAGAAACTGCCGAAATCGTCGTGGTATTACTCCAGAGCGATGAAAACGTTTCAGTTTG  
CTCATGGAAAACGGTGTAACAAGGGTGAACACTATCCCATATCACCAGCTCACCGTCTTTCA  
TTGCCATACGGAACCTCCGGATGAGCATTATCAGGCGGGCAAGAATGTGAATAAAGGCCGG  
ATAAACTTGTGCTTATTTTTCTTTACGGTCTTTAAAAAGGCCGTAATATCCAGCTGAACGGT  
CTGGTTATAGGTACATTGAGCAACTGACTGAAATGCCTCAAAATGTTCTTTACGATGCCATTG  
GGATATATCAACGGTGGTATATCCAGTGATTTTTTTCTCCATTTTAGCTTCCTTAGCTCCTGAA  
AATCTCGATAACTCAAAAATACGCCCGGTAGTGATCTTATTTTCATTATGGTGAAAGTTGGA  
ACCTCTTACGTGCCGATCAACGTCTCATTTTCGCCAAAAGTTGGCCAGGGCTTCCCGGTATC  
AACAGGGACACCAGGATTTATTTATTCTGCGAAGTGATCTTCCGTACAGGTATTTATTCGGC  
GCAAAGTGCGTCGGGTGATGCTGCCAACTTACTGATTTAGTGTATGATGGTGTTTTTTGAGGTG  
CTCCAGTGGCTTCTGTTTCTATCAGCTGTCCCTCCTGTTTCAGCTACTGACGGGGTGGTGCGTA  
ACGGCAAAGCACCCGCGGACATCAGCGCTAGCGGAGTGTATACTGGCTTACTATGTTGGCA  
CTGATGAGGGTGTCAAGTGAAGTCTCATGTGGCAGGAGAAAAAGGCTGCACCCGGTGCCTC  
AGCAGAATATGTGATACAGGATATATTCGGCTTCCCTCGCTCACTGACTCGCTACGCTCGGTG  
TTGACTGCGGCGAGCGGAAATGGCTTACGAACGGGGCGGAGATTTCTGGAAGATGCCAG  
GAAGATACTTAACAGGGAAGTGAGAGGGCCGCGGCAAAGCCGTTTTTTCATAGGCTCCGCCC  
CCCTGACAAGCATCACGAAATCTGACGCTCAAATCAGTGGTGGCGAAACCCGACAGGACTAT  
AAAGATAACCAGGCGTTTTCCCTGGCGGCTCCCTCGTGCGCTCTCCTGTTCCCTGCCTTTCCGTTT  
ACCGGTGTCATTCCGCTGTTATGGCCGCGTTTGTCTCATTCCACGCCTGACACTCAGTTCCGG  
GTAGGCAGTTCGCTCCAAGCTGGACTGTATGCACGAACCCCCGTTTCAGTCCGACCGCTGCG  
CCTTATCCGGTAACTATCGTCTTGAGTCCAACCCGGAAGACATGCAAAGCACC ACTGGCA  
GCAGCCACTGGTAATTGATTTAGAGGAGTTAGTCTTGAAGTCATGCGCCGGTTAAGGCTAAA  
CTGAAAGGACAAGTTTTGGTGACTGCGCTCCTCCAAGCCAGTTACCTCGGTTCAAAGAGTTG  
GTAGCTCAGAGAACCTTCGAAAAACCGCCCTGCAAGGCGGTTTTTTTCGTTTTTCAGAGCAAGA  
GATTACGCGCAGACCAAAACGATCTCAAGAAGATCATCTTATTAATCAGATAAAAATATTTCT  
AGATTTTCAGTGCAATTTATCTCTTCAAATGTAGCACCTGAAGTCAGCCCCATACGATATAAGT  
TGTAATTCTCATGTTAGTCATGCCCCGCGCCACCGGAAGGAGCTGACTGGGTTGAAGGCTC  
TCAAGGGCATCGGTGAGATCCCGGTGCCTAATGAGTGAGCTAACTTACATTAATTGCGTTG  
CGCTCACTGCCCCGTTTTCCAGTCGGGAAACCTGTGCGTGCCAGCTGCATTAATGAATCGGCCA

ACGCGCGGGGAGAGGCGGTTTGC GTATTGGGCGCCAGGGTGGTTTTTCTTTTCACCAGTGAG  
ACGGGCAACAGCTGATTGCCCTTCAACGCCTGGCCCTGAGAGAGTTGCAGCAAGCGGTCCAC  
GCTGGTTTGCCCCAGCAGGCGAAAATCCTGTTTGATGGTGGTTAACGGCGGGATATAACATG  
AGCTGTCTTCGGTATCGTCGTATCCCACTACCGAGATGTCCGCACCAACGCGCAGCCCGGAC  
TCGGTAATGGCGCGCATTGCGCCCAGCGCCATCTGATCGTTGGCAACCAGCATCGCAGTGGG  
AACGATGCCCTCATTAGCATTGTCATGGTTTTGTTGAAAACCGGACATGGCACTCCAGTCGCG  
TTCCCGTTCCGCTATCGGCTGAATTTGATTGCGAGTGAGATATTTATGCCAGCCAGCCAGACG  
CAGACGCGCCGAGACAGA ACTTAATGGGCCCGCTAACAGCGCGATTTGCTGGTGACCCAATG  
CGACCAGATGCTCCACGCCAGTCGCGTACCGTCTTCATGGGAGAAAATAATACTGTTGATG  
GGTGTCTGGTCAGAGACATCAAGAAATAACGCCGGAACATTAAGTGCAGGCAGCTTCCACAGC  
AATGGCATCCTGGTCATCCAGCGGATAGTTAATGATCAGCCCACTGACGCGTTGCGCGAGAA  
GATTGTGCACCGCCGCTTTACAGGCTTCGACGCCGCTTCGTTCTACCATCGACACCACCACGC  
TGGCACCCAGTTGATCGGCGCGAGATTTAATCGCCGCGACAATTTGCGACGGCGCGTGCAGG  
GCCAGACTGGAGGTGGCAACGCCAATCAGCAACGACTGTTTGCCCGCCAGTTGTTGTGCCAC  
GCGGTTGGGAATGTAATTCAGCTCCGCCATCGCCGCTTCCACTTTTTCCCGCGTTTTTCGCAGA  
AACGTGGCTGGCCTGGTTCACCACGCGGGAAACGGTCTGATAAGAGACACCGGCATACTCTG  
CGACATCGTATAACGTTACTGGTTTTACATTCACCACCCTGAATTGACTCTCTTCCGGGCGCT  
ATCATGCCATAACCGCGAAAGGTTTTGCGCCATTTCGATGGTGTCCGGGATCTCGACGCTCTCCC  
TTATGCGACTCCTGCATTAGGAAATTAATACGACTCACTATA

f. pDuet::GroL

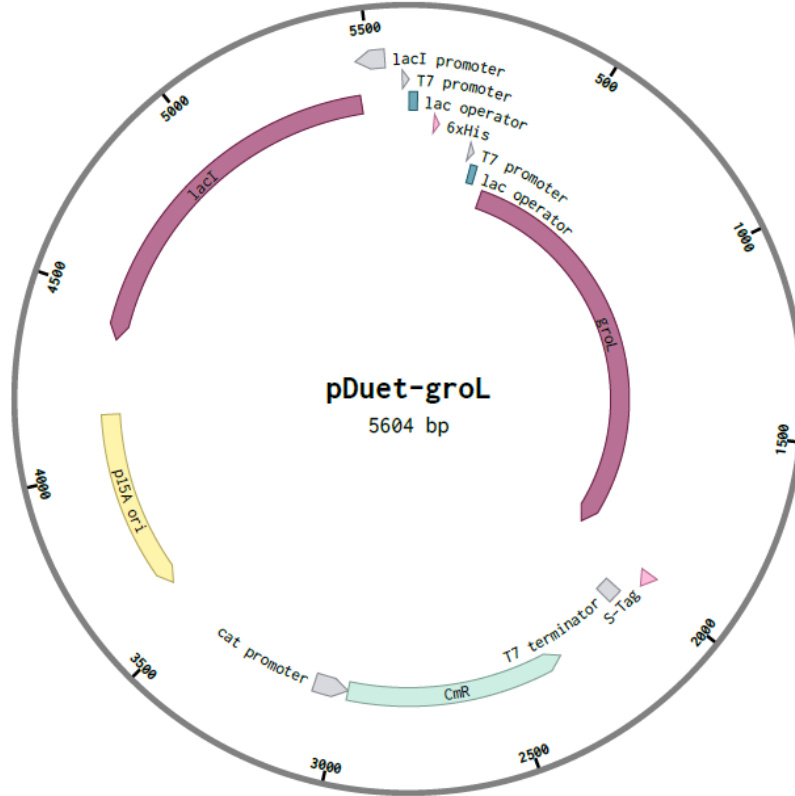

GGGGAATTGTGAGCGGATAACAATTCCTGTAGAAATAATTTTGTTTAACTTTAATAAGGA  
 GATATACCATGGGCAGCAGCCATCACCATCATCACCACAGCCAGGATCCGAATTCGAGCTCG  
 GCGCGCCTGCAGGTCGACAAGCTTGCGGCCGCATAATGCTTAAGTCGAACAGAAAGTAATCG  
 TATTGTACACGGCCGCATAATCGAAATTAATACGACTCACTATAGGGGAATTGTGAGCGGAT  
 AACAATTCCTCATCTTAGTATATTAGTTAAGTATAAGAAGGAGATATACATATGATGGCAGC  
 TAAAGACGTAAAATTCGGTAACGACGCTCGTGTGAAAATGCTGCGCGGCGTAAACGTACTGG  
 CAGATGCAGTGAAAGTTACCCTCGGTCCAAAAGGCCGTAACGTAGTTCTGGATAAATCTTTC  
 GGTGCACCGACCATCACCAAAGATGGTGTTCCTGCTCGTGAAATCGAACTGGAAGACAA  
 GTTCGAAAATATGGGTGCGCAGATGGTGAAGAAGTTGCCTCTAAAGCAAACGACGCTGCA  
 GGCGACGGTACCACCACTGCAACCGTACTGGCTCAGGCTATCATCACTGAAGGTCTGAAAGC  
 TGTTGCTGCGGGCATGAACCCGATGGACCTGAAACGTGGTATCGACAAAGCGGTTACCGCTG  
 CAGTTGAAGAACTGAAAGCGCTGTCCGTACCATGCTCTGACTCTAAAGCGATTGCTCAGGTT  
 GGTACCATCTCCGCTAACTCCGACGAAACCGTAGGTAAACTGATCGCTGAAGCGATGGACAA  
 AGTCGGTAAAGAAGGCGTTATCACCGTTGAAGACGGTACCGGTCTGCAGGACGAACTGGAC  
 GTGGTTGAAGGTATGCAGTTCGACCGTGGCTACCTGTCTCCTTACTTCATCAACAAGCCGGAA  
 ACTGGCGCAGTAGAACTGGAAAGCCCGTTCATCCTGCTGGCTGACAAGAAAATCTCCAACAT

CCGCGAAATGCTGCCGGTTCTGGAAGCTGTTGCCAAAGCAGGCAAACCGCTGCTGATCATCG  
CTGAAGATGTAGAAGGCGAAGCGCTGGCAACTCTGGTTGTAAACACCATGCGTGGCATCGTG  
AAAGTCGCTGCGGTTAAAGCACCGGGCTTCGGCGATCGTCGTAAAGCTATGCTGCAGGATAT  
CGCAACCCTGACTGGCGGTACCGTGATCTCTGAAGAGATCGGTATGGAGCTGGAAAAAGCA  
ACCCTGGAAGACCTGGGTCAGGCTAAACGTGTTGTGATCAACAAAGACACCACCACTATCAT  
CGATGGCGTGGGTGAAGAAGCTGCAATCCAGGGCCGTGTTGCTCAGATCCGTCAGCAGATTG  
AAGAAGCAACTTCTGACTACGACCGTGAAAACTGCAGGAACGCGTAGCGAAACTGGCAGG  
CGGCGTTGCAGTTATCAAAGTGGGTGCTGCTACCGAAGTTGAAATGAAAGAGAAAAAAGCA  
CGCGTTGAAGATGCCCTGCACGCGACCCGTGCTGCGGTAGAAGAAGGCGTGGTTGCTGGTGG  
TGGTGTTCGCTGATCCGCGTAGCGTCTAAACTGGCTGACCTGCGTGGTCAGAACGAAGACC  
AGAACGTGGGTATCAAAGTTGCACTGCGTGCAATGGAAGCTCCGCTGCGTCAGATCGTATTG  
AACTGCGGCGAAGAACCGTCTGTTGTTGCTAACACCGTTAAAGGCGGCGACGGCAACTACGG  
TTACAACGCAGCAACCGAAGAATACGGCAACATGATCGACATGGGTATCCTGGATCCAACCA  
AAGTAACTCGTTCTGCTCTGCAGTACGCAGCTTCTGTGGCTGGCCTGATGATCACCACCGAAT  
GCATGGTTACCGACCTGCCGAAAAACGATGCAGCTGACTTAGGCGCTGCTGGCGGTATGGGC  
GGCATGGGTGGCATGGGCGGCATGATGTAACCTCGAGTCTGGTAAAGAAACCGCTGCTGCGA  
AATTTGAACGCCAGCACATGGACTCGTCTACTAGCGCAGCTTAATTAACCTAGGCTGCTGCC  
ACCGCTGAGCAATAACTAGCATAACCCCTTGGGGCCTCTAAACGGGTCTTGAGGGGTTTTTT  
GCTGAAACCTCAGGCATTTGAGAAGCACACGGTCACACTGCTTCCGGTAGTCAATAAACCGG  
TAAACCAGCAATAGACATAAGCGGCTATTTAACGACCCTGCCCTGAACCGACGACCGGGTGC  
AATTTGCTTTCGAATTTCTGCCATTCATCCGCTTATTATCACTTATTCAGGCGTAGCACCAGGC  
GTTTAAAGGGCACCAATAACTGCCTTAAAAAAATTACGCCCCGCCCTGCCACTCATCGCAGTA  
CTGTTGTAATTCATTAAGCATTCTGCCGACATGGAAGCCATCACAGACGGCATGATGAACCT  
GAATCGCCAGCGGCATCAGCACCTTGTCGCCTTGCGTATAATATTTGCCCATAGTGAAAACG  
GGGGCGAAGAAGTTGTCCATATTGGCCACGTTTAAATCAAACCTGGTGAAACTCACCCAGGG  
ATTGGCTGAGACGAAAAACATATTCTCAATAAACCCCTTTAGGGAAATAGGCCAGGTTTTTAC  
CGTAACACGCCACATCTTGCGAATATATGTGTAGAAACTGCCGAAATCGTCGTGGTATTCA  
CTCCAGAGCGATGAAAACGTTTCAGTTTGCTCATGGAAAACGGTGTAACAAGGGTGAACACT  
ATCCCATATCACCAGCTCACCGTCTTTCATTGCCATACGGAACCTCCGGATGAGCATTTCATCAG  
GCGGGCAAGAATGTGAATAAAGGCCGGATAAAACTTGTGCTTATTTTTCTTTACGGTCTTTAA  
AAAGGCCGTAATATCCAGCTGAACGGTCTGGTTATAGGTACATTGAGCAACTGACTGAAATG  
CCTCAAATGTTCTTTACGATGCCATTGGGATATATCAACGGTGGTATATCCAGTGATTTTTT  
TCTCCATTTTAGCTTCCTTAGCTCCTGAAAATCTCGATAACTCAAAAAATACGCCCGGTAGTG  
ATCTTATTTTATTATGGTGAAAGTTGGAACCTCTTACGTGCCGATCAACGTCTCATTTTTCGCC

AAAAGTTGGCCCAGGGCTTCCCGGTATCAACAGGGACACCAGGATTTATTTATTCTGCGAAG  
TGATCTTCCGTCACAGGTATTTATTCGGCGCAAAGTGCCTCGGGTGATGCTGCCAACTTACTG  
ATTTAGTGTATGATGGTGTTTTTGAGGTGCTCCAGTGGCTTCTGTTTCTATCAGCTGTCCCTCC  
TGTTCACTACTGACGGGGTGGTGCCTAACGGCAAAGCACCAGCCGGACATCAGCGCTAGCG  
GAGTGTATACTGGCTTACTATGTTGGCACTGATGAGGGTGTGAGTGAAGTGCTTCATGTGGC  
AGGAGAAAAAAGGCTGCACCGGTGCGTCAGCAGAATATGTGATACAGGATATATTCGGCTTC  
CTCGCTCACTGACTCGCTACGCTCGGTGCTTCGACTGCGGCGAGCGGAAATGGCTTACGAAC  
GGGCGGAGATTTCTGGAAGATGCCAGGAAGATACTTAACAGGGAAGTGAGAGGGCCGCG  
GCAAAGCCGTTTTTCCATAGGCTCCGCCCCCTGACAAGCATCACGAAATCTGACGCTCAAA  
TCAGTGGTGGCGAAACCCGACAGGACTATAAAGATACCAGGCGTTTTCCCTGGCGGCTCCCT  
CGTGCGCTCTCCTGTTCTGCTTTCGGTTTACCGGTGTCATTCCGCTGTTATGGCCGCGTTTG  
TCTCATTCCACGCCTGACACTCAGTTCGGGTAGGCAGTTCGCTCCAAGCTGGACTGTATGCA  
CGAACCCCGTTCAGTCCGACCGCTGCGCCTTATCCGGTAACTATCGTCTTGAGTCCAACCC  
GGAAAGACATGCAAAGCACCCTGGCAGCAGCCACTGGTAATTGATTTAGAGGAGTTAGT  
CTTGAAGTCATGCGCCGGTTAAGGCTAAACTGAAAGGACAAGTTTTGGTGACTGCGCTCCTC  
CAAGCCAGTTACCTCGGTTCAAAGAGTTGGTAGCTCAGAGAACCTTCGAAAAACCGCCCTGC  
AAGGCGGTTTTTTCGTTTTCAGAGCAAGAGATTACGCGCAGACCAAAACGATCTCAAGAAGA  
TCATCTTATTAATCAGATAAAATATTTCTAGATTTAGTGCAATTTATCTCTTCAAATGTAGC  
ACCTGAAGTCAGCCCCATACGATATAAGTTGTAATTCTCATGTTAGTCATGCCCCGCGCCCAC  
CGGAAGGAGCTGACTGGGTTGAAGGCTCTCAAGGGCATCGGTGAGATCCCGGTGCCTAATG  
AGTGAGCTAACTTACATTAATTGCGTTGCGCTCACTGCCCCGCTTTCCAGTCGGGAAACCTGTC  
GTGCCAGCTGCATTAATGAATCGGCCAACGCGCGGGGAGAGGCGGTTTTGCGTATTGGGCGCC  
AGGGTGGTTTTTCTTTTACCAGTGAGACGGGCAACAGCTGATTGCCCTTACCAGCCTGGCCC  
TGAGAGAGTTGCAGCAAGCGGTCCACGCTGGTTTGCCCCAGCAGGCGAAAATCCTGTTTGAT  
GGTGGTTAACGGCGGGATATAACATGAGCTGTCTTCGGTATCGTTCGTATCCCACTACCGAGA  
TGTCCGCACCAACGCGCAGCCGGACTCGGTAATGGCGCGCATTGCGCCCAGCGCCATCTGA  
TCGTTGGCAACCAGCATCGCAGTGGGAACGATGCCCTCATTAGCATTTGCATGGTTTGTGTA  
AAACCGGACATGGCACTCCAGTCGCCTTCCCGTTCCGCTATCGGCTGAATTTGATTGCGAGTG  
AGATATTTATGCCAGCCAGCCAGACGCGAGACGCGCCGAGACAGAACTTAATGGGCCCCGCTA  
ACAGCGCGATTTGCTGGTGACCCAATGCGACCAGATGCTCCACGCCAGTCGCGTACCGTCT  
TCATGGGAGAAAATAATACTGTTGATGGGTGTCTGGTCAGAGACATCAAGAAATAACGCCGG  
AACATTAGTGACAGCAGCTTCCACAGCAATGGCATCCTGGTCATCCAGCGGATAGTTAATGA  
TCAGCCCCTGACGCGTTGCGCGAGAAGATTGTGCACCGCCGCTTTACAGGCTTCGACGCCG  
CTTCGTTCTACCATCGACACCACCAGCTGGCACCCAGTTGATCGGCGCGAGATTTAATCGCC

GCGACAATTTGCGACGGCGCGTGCAGGGCCAGACTGGAGGTGGCAACGCCAATCAGCAACG  
ACTGTTTGCCCGCCAGTTGTTGTGCCACGCGGTTGGGAATGTAATTCAGCTCCGCCATCGCCG  
CTTCCAATTTTTCCCGCGTTTTTCGCAGAAACGTGGCTGGCCTGGTTTACCACGCGGGAAACGG  
TCTGATAAGAGACACCGGCATACTCTGCGACATCGTATAACGTTACTGGTTTCACATTCACCA  
CCCTGAATTGACTCTCTTCCGGGCGCTATCATGCCATACCGCGAAAGGTTTTGCGCCATTCTGA  
TGGTGTCCGGGATCTCGACGCTCTCCCTTATGCGACTCCTGCATTAGGAAATTAATACGACTC  
ACTATA

g. pDuet::GroSL

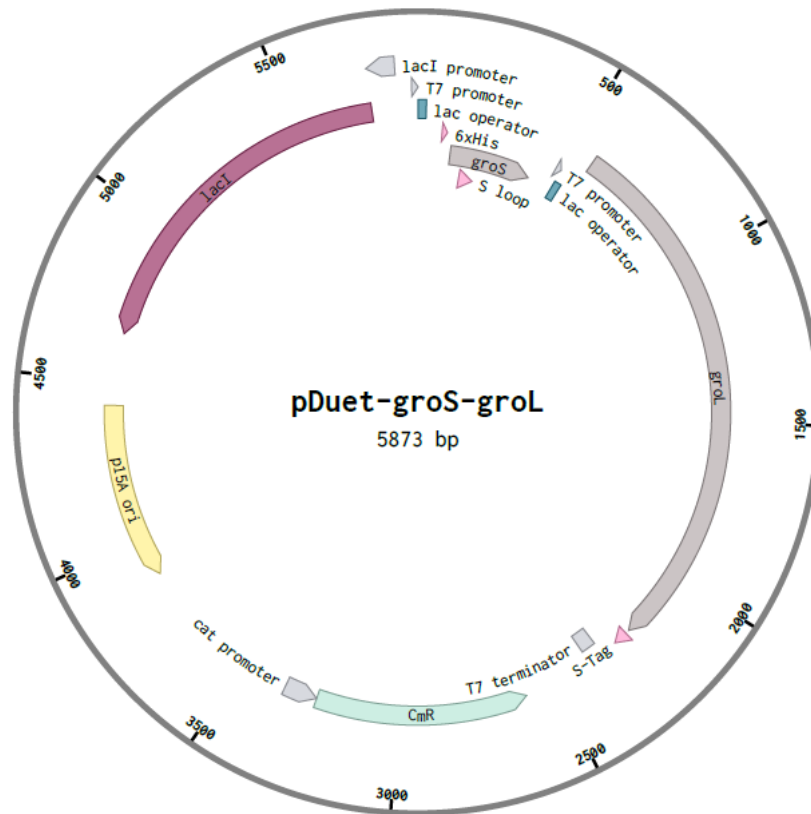

GGGGAATTGTGAGCGGATAACAATTCCTGTAGAAATAATTTTGTTTAACTTTAATAAGGA  
GATATACCATGGGCAGCAGCCATCACCATCATCACCACAGCCAGGATCCGAATTCATGAATA  
TTCGTCCATTGCATGATCGCGTGATCGTCAAGCGTAAAGAAGTTGAAACTAAATCTGCTGGC  
GGCATCGTTCTGACCGGCTCTGCAGCGGCTAAATCCACCCGCGGCGAAGTGCTGGCTGTCGG  
CAATGGCCGTATCCTTGAAAATGGCGAAGTGAAGCCGCTGGATGTGAAAGTTGGCGACATCG  
TTATTTTCAACGATGGCTACGGTGTGAAATCTGAGAAGATCGACAATGAAGAAGTGTGATC  
ATGTCCGAAAGCGACATTCTGGCAATTGTTGAAGCGTAAAAGCTTGCGGCCGCATAATGCTT  
AAGTCGAACAGAAAGTAATCGTATTGTACACGGCCGCATAATCGAAATTAATACGACTCACT  
ATAGGGGAATTGTGAGCGGATAACAATTCCTCATCTTAGTATATTAGTTAAGTATAAGAAGG  
AGATATACATATGATGGCAGCTAAAGACGTAAAATTCGGTAACGACGCTCGTGTGAAAATGC  
TGCGCGGCGTAAACGTACTGGCAGATGCAGTGAAAGTTACCCTCGGTCCAAAAGGCCGTAAC  
GTAGTTCTGGATAAATCTTTCGGTGCACCGACCATCACCAAAGATGGTGTTCCTGCTCGT  
GAAATCGAACTGGAAGACAAGTTCGAAAATATGGGTGCGCAGATGGTGAAAGAAGTTGCCT  
CTAAAGCAAACGACGCTGCAGGCGACGGTACCACCACTGCAACCGTACTGGCTCAGGCTATC  
ATCACTGAAGGTCTGAAAGCTGTTGCTGCGGGCATGAACCCGATGGACCTGAAACGTGGTAT  
CGACAAAGCGGTTACCGCTGCAGTTGAAGAAGTAAAGCGCTGTCCGTACCATGCTCTGACT

CTAAAGCGATTGCTCAGGTTGGTACCATCTCCGCTAACTCCGACGAAACCGTAGGTAACTG  
ATCGCTGAAGCGATGGACAAAGTCGGTAAAGAAGGCGTTATCACCGTTGAAGACGGTACCG  
GTCTGCAGGACGAACTGGACGTGGTTGAAGGTATGCAGTTCGACCGTGGCTACCTGTCTCCT  
TACTTCATCAACAAGCCGGAACTGGCGCAGTAGAACTGGAAAGCCCGTTCATCCTGCTGGC  
TGACAAGAAAATCTCCAACATCCGCGAAATGCTGCCGGTCTGGAAAGCTGTTGCCAAAGCAG  
GCAAACCGCTGCTGATCATCGCTGAAGATGTAGAAGGCGAAGCGCTGGCAACTCTGGTTGTT  
AACACCATGCGTGGCATCGTGAAAGTCGCTGCGGTTAAAGCACCGGGCTTCGGCGATCGTCG  
TAAAGCTATGCTGCAGGATATCGCAACCCTGACTGGCGGTACCGTGATCTCTGAAGAGATCG  
GTATGGAGCTGGAAAAAGCAACCCTGGAAGACCTGGGTCAGGCTAAACGTGTTGTGATCAA  
CAAAGACACCACCACTATCATCGATGGCGTGGGTGAAGAAGCTGCAATCCAGGGCCGTGTTG  
CTCAGATCCGTCAGCAGATTGAAGAAGCAACTTCTGACTACGACCGTGAAAACTGCAGGAA  
CGCGTAGCGAAACTGGCAGGCGGCGTTGCAGTTATCAAAGTGGGTGCTGCTACCGAAGTTGA  
AATGAAAGAGAAAAAGCACGCGTTGAAGATGCCCTGCACGCGACCCGTGCTGCGGTAGAA  
GAAGGCGTGGTTGCTGGTGGTGGTGGTGGTGGTGGTGGTGGTGGTGGTGGTGGTGGTGGT  
GCGTGGTCAGAACGAAGACCAGAACGTGGGTATCAAAGTTGCACTGCGTGCAATGGAAGCT  
CCGCTGCGTCAGATCGTATTGAACTGCGGCGAAGAACCGTCTGTTGTTGCTAACACCGTTAA  
AGGCGGCGACGGCAACTACGGTTACAACGCAGCAACCGAAGAATACGGCAACATGATCGAC  
ATGGGTATCCTGGATCCAACCAAAGTAACTCGTTCTGCTCTGCAGTACGCAGCTTCTGTGGCT  
GGCCTGATGATCACCACCGAATGCATGGTTACCGACCTGCCGAAAAACGATGCAGCTGACTT  
AGGCGCTGCTGGCGGTATGGGCGGCATGGGTGGCATGGGCGGCATGATGTAACCTCGAGTCTG  
GTAAAGAAACCGCTGCTGCGAAATTTGAACGCCAGCACATGGACTCGTCTACTAGCGCAGCT  
TAATTAACCTAGGCTGCTGCCACCGCTGAGCAATAACTAGCATAACCCCTTGGGGCCTCTAA  
ACGGGTCTTGAGGGGTTTTTTGCTGAAACCTCAGGCATTTGAGAAGCACACGGTCACACTGC  
TTCCGGTAGTCAATAAACCGGTAAACCAGCAATAGACATAAGCGGCTATTTAACGACCCTGC  
CCTGAACCGACGACCGGGTCGAATTTGCTTTTGAATTTCTGCCATTCATCCGCTTATTATCAC  
TTATTCAGGCGTAGCACCAGGCGTTTAAGGGCACCAATAACTGCCTTAAAAAATTACGCCC  
CGCCCTGCCACTCATCGCAGTACTGTTGTAATTCATTAAGCATTCTGCCGACATGGAAGCCAT  
CACAGACGGCATGATGAACCTGAATCGCCAGCGGCATCAGCACCTTGTCGCCTTGCGTATAA  
TATTTGCCCATAGTGAAAACGGGGGCGAAGAAGTTGTCCATATTGGCCACGTTTAAATCAA  
ACTGGTGAACTCACCCAGGGATTGGCTGAGACGAAAAACATATTCTCAATAAACCCCTTTAG  
GGAAATAGGCCAGGTTTTTACCGTAACACGCCACATCTTGCGAATATATGTGTAGAACTGC  
CGGAAATCGTCGTGGTATTCACTCCAGAGCGATGAAAACGTTTCAGTTTGCTCATGGAAAAC  
GGTGTAAACAAGGGTGAACACTATCCCATATCACCAGCTCACCGTCTTTCATTGCCATACGGA  
ACTCCGGATGAGCATTATCAGGCGGGCAAGAATGTGAATAAAGGCCGGATAAAACTTGTG



CTTATTTTTCTTTACGGTCTTTAAAAAGGCCGTAATATCCAGCTGAACGGTCTGGTTATAGGT  
ACATTGAGCAACTGACTGAAATGCCTCAAAATGTTCTTTACGATGCCATTGGGATATATCAA  
CGGTGGTATATCCAGTGATTTTTTTCTCCATTTTAGCTTCCTTAGCTCCTGAAAATCTCGATAA  
CTCAAAAATACGCCCGGTAGTGATCTTATTTTATTATGGTGAAAGTTGGAACCTCTTACGTG  
CCGATCAACGTCTCATTTCGCCAAAAGTTGGCCCAGGGCTTCCCGGTATCAACAGGGACAC  
CAGGATTTATTTATTCTGCGAAGTGATCTTCCGTCACAGGTATTTATTTCGGCGCAAAGTGCGT  
CGGGTGATGCTGCCAACTTACTGATTTAGTGTATGATGGTGTTTTTTGAGGTGCTCCAGTGGCT  
TCTGTTTTCTATCAGCTGTCCCTCCTGTTTCAGCTACTGACGGGGTGGTGCGTAACGGCAAAGC  
ACCGCCGGACATCAGCGCTAGCGGAGTGTATACTGGCTTACTATGTTGGCACTGATGAGGGT  
GTCAGTGAAGTGCTTCATGTGGCAGGAGAAAAAAGGCTGCACCGGTGCGTCAGCAGAATAT  
GTGATACAGGATATATTCCGCTTCCTCGCTCACTGACTCGCTACGCTCGGTTCGTTTCGACTGCG  
GCGAGCGGAAATGGCTTACGAACGGGGCGGAGATTTCTGGAAGATGCCAGGAAGATACTT  
AACAGGGAAGTGAGAGGGCCGCGCAAAGCCGTTTTTTCCATAGGCTCCGCCCCCTGACAAG  
CATCACGAAATCTGACGCTCAAATCAGTGGTGGCGAAACCCGACAGGACTATAAAGATACC  
AGGCGTTTTCCCTGGCGGCTCCCTCGTGCGCTCTCCTGTTCTCCTGCCTTTTCGGTTTACCGGTGTC  
ATTCCGCTGTTATGGCCGCGTTTGTCTCATTCCACGCCTGACACTCAGTTCCGGGTAGGCAGT  
TCGCTCCAAGCTGGACTGTATGCACGAACCCCCGTTTCAGTCCGACCGCTGCGCCTTATCCGG  
TAACTATCGTCTTGAGTCCAACCCGGAAAGACATGAAAAGCACCCTGGCAGCAGCCACTG  
GTAATTGATTTAGAGGAGTTAGTCTTGAAGTCATGCGCCGGTTAAGGCTAAACTGAAAGGAC  
AAGTTTTGGTGACTGCGCTCCTCCAAGCCAGTTACCTCGGTTCAAAGAGTTGGTAGCTCAGA  
GAACCTTCGAAAAACCGCCCTGCAAGGCGGTTTTTTTCGTTTTTCAGAGCAAGAGATTACGCGC  
AGACCAAACGATCTCAAGAAGATCATCTTATTAATCAGATAAAAATATTTCTAGATTTTCACT  
GCAATTTATCTCTTCAAATGTAGCACCTGAAGTCAGCCCCATACGATATAAGTTGTAATTCTC  
ATGTTAGTCATGCCCCGCGCCACCGGAAGGAGCTGACTGGGTTGAAGGCTCTCAAGGGCAT  
CGGTTCGAGATCCCGGTGCCTAATGAGTGAGCTAACTTACATTAATTGCGTTGCGCTCACTGCC  
CGTTTTCCAGTCGGGAAACCTGTCGTGCCAGCTGCATTAATGAATCGGCCAACGCGCGGGGA  
GAGGCGGTTTTGCGTATTGGGCGCCAGGGTGGTTTTTTCTTTTACCAGTGAGACGGGCAACAG  
CTGATTGCCCTTACCGCCTGGCCCTGAGAGAGTTGCAGCAAGCGGTCCACGCTGGTTTTGCC  
CAGCAGGCGAAAATCCTGTTTGATGGTGGTTAACGGCGGGATATAACATGAGCTGTCTTCGG  
TATCGTTCGATCCCACTACCGAGATGTCCGCACCAACGCGCAGCCCGGACTCGGTAATGGCG  
CGCATTGCGCCCAGCGCCATCTGATCGTTGGCAACCAGCATCGCAGTGGGAACGATGCCCTC  
ATTCAGCATTTGCATGGTTTTGTTGAAAACCGGACATGGCACTCCAGTCGCCTTCCCGTTCCGC  
TATCGGCTGAATTTGATTGCGAGTGAGATATTTATGCCAGCCAGCCAGACGCAGACGCGCCG  
AGACAGAACTTAATGGGCCCGCTAACAGCGCGATTTGCTGGTGACCCAATGCGACCAGATGC

TCCACGCCAGTCGCGTACCGTCTTCATGGGAGAAAATAATACTGTTGATGGGTGTCTGGTC  
AGAGACATCAAGAAATAACGCCGGAACATTAGTGCAGGCAGCTTCCACAGCAATGGCATCC  
TGGTCATCCAGCGGATAGTTAATGATCAGCCACTGACGCGTTGCGCGAGAAGATTGTGCAC  
CGCCGCTTTACAGGCTTCGACGCCGCTTCGTTCTACCATCGACACCACCACGCTGGCACCCAG  
TTGATCGGCGCGAGATTTAATCGCCGCGACAATTTGCGACGGCGCGTGCAGGGCCAGACTGG  
AGGTGGCAACGCCAATCAGCAACGACTGTTTGCCCGCCAGTTGTTGTGCCACGCGGTTGGGA  
ATGTAATTCAGCTCCGCCATCGCCGCTTCCACTTTTTCCCGCGTTTTTCGCAGAAACGTGGCTG  
GCCTGGTTCACCACGCGGGAAACGGTCTGATAAGAGACACCGGCATACTCTGCGACATCGTA  
TAACGTTACTGGTTTCACATTCACCACCCTGAATTGACTCTCTTCCGGGCGCTATCATGCCAT  
ACCGCGAAAGGTTTTGCGCCATTCGATGGTGTCCGGGATCTCGACGCTCTCCCTTATGCGACT  
CCTGCATTAGGAAATTAATACGACTCACTATA

**h. pDuet::DnaK**

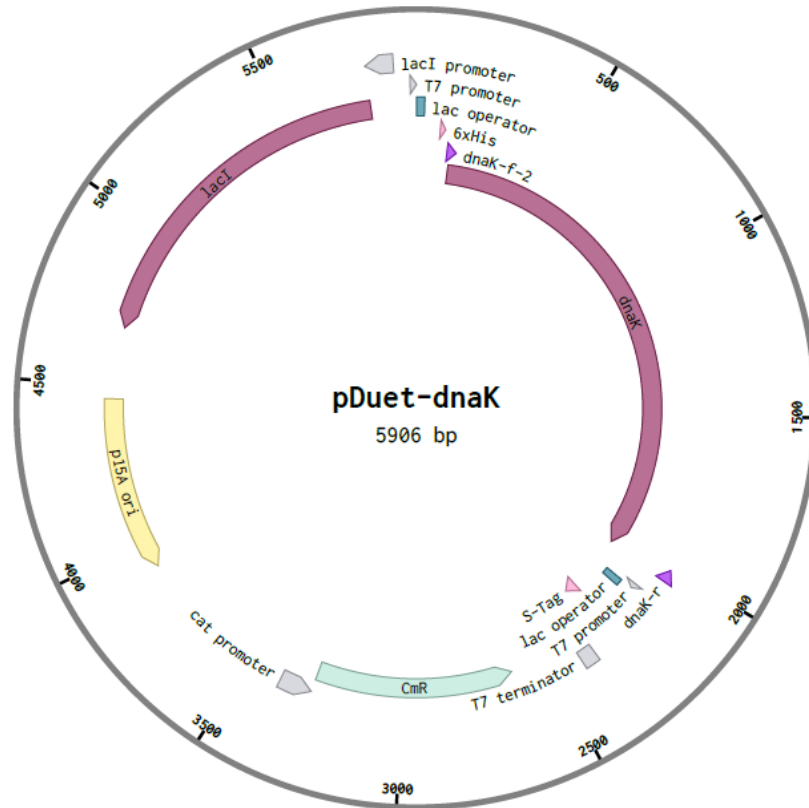

GGGGAATTGTGAGCGGATAACAATTCCTGTAGAAATAATTTTGTTTAACTTTAATAAGGA  
GATATACCATGGGCAGCAGCCATCACCATCATCACCACAGCCAGGATCCGAATTCGAGCTCA  
TGGGTAAAATAATTGGTATCGACCTGGGTACTACCAACTCTTGTGTAGCGATTATGGATGGC  
ACCACTCCTCGCGTGCTGGAGAACGCCGAAGGCGATCGCACCACGCCTTCTATCATTGCCTA  
TACCCAGGATGGTGAAACTCTAGTTGGTCAGCCGGCTAAACGTCAGGCAGTGACGAACCCGC  
AAAACACTCTGTTTGCGATTAACGCCTGATTGGTCGCCGCTTCCAGGACGAAGAAGTACAG  
CGTGATGTTTCCATCATGCCGTTCAAAATTATTGCTGCTGATAACGGCGACGCATGGGTGCGAA  
GTTAAAGGCCAGAAAATGGCACCGCCGCAGATTTCTGCTGAAGTGCTGAAAAAATGAAGA  
AAACCGCTGAAGATTACCTGGGTGAACCGGTAAGCTGTTATCACCGTACCGGCATAC  
TTTAACGATGCTCAGCGTCAGGCAACCAAGACGCAGGCCGTATCGCTGGTCTGGAAGTAAA  
ACGTATCATCAACGAACCGACCGCAGCTGCGCTGGCTTACGGTCTGGACAAAGGCACTGGCA  
ACCGTACTATCGCGGTTTATGACCTGGGTGGTGGTACTTTCGATATTTCTATTATCGAAATCG  
ACGAAGTTGACGGCGAAAAACCTTCGAAGTTCTGGCAACCAACGGTGATACCCACCTGGG  
GGGTGAAGACTTCGACAGCCGTCTGATCAACTATCTGGTTGAAGAATTCAAGAAAGATCAGG  
GCATTGACCTGCGCAACGATCCGCTGGCAATGCAGCGCCTGAAAGAAGCGGCAGAAAAAGC  
GAAAATCGAACTGTCTTCCGCTCAGCAGACCGACGTTAACCTGCCATACATCACTGCAGACG

CGACCGGTCCGAAACACATGAACATCAAAGTGACTCGTGCGAAACTGGAAAGCCTGGTTGA  
AGATCTGGTAAACCGTTCCATTGAGCCGCTGAAAGTTGCACTGCAGGACGCTGGCCTGTCCG  
TATCTGATATCGACGACGTTATCCTCGTTGGTGGTCAGACTCGTATGCCAATGGTTCAGAAGA  
AAGTTGCTGAGTTCTTTGGTAAAGAGCCGCGTAAAGACGTTAACCCGGACGAAGCTGTAGCA  
ATCGGTGCTGCTGTTTCAGGGTGGTGTCTGACTGGTGACGTAAAAGACGTACTGCTGCTGGA  
CGTTACCCCGCTGTCTCTGGGTATCGAAACCATGGGCGGTGTGATGACGACGCTGATCGCGA  
AAAACACCACTATCCCGACCAAGCACAGCCAGGTGTTCTCTACCGCTGAAGACAACCAGTCT  
GCGGTAACCATCCATGTGCTGCAGGGTGAACGTAAACGTGCGGCTGATAACAAATCTCTGGG  
TCAGTTCAACCTAGATGGTATCAACCCGGCACCCGCGCGGCATGCCGCAGATCGAAGTTACCT  
TCGATATCGATGCTGACGGTATCCTGCACGTTTCCGCGAAAGATAAAAACAGCGGTAAAGAG  
CAGAAGATCACCATCAAGGCTTCTTCTGGTCTGAACGAAGATGAAATCCAGAAAATGGTACG  
CGACGCAGAAGCTAACGCCGAAGCTGACCGTAAGTTTGAAGAGCTGGTACAGACTCGCAAC  
CAGGGCGACCATCTGCTGCACAGCACCCGTAAGCAGGTTGAAGAAGCAGGCGACAAACTGC  
CGGCTGACGACAAAAGTCTATCGAGTCTGCGCTGACTGCACTGGAAACTGCTCTGAAAGGT  
GAAGACAAAGCCGCTATCGAAGCGAAAATGCAGGAACTGGCACAGGTTTCCAGAAAAGTGA  
TGGAAATCGCCCAGCAGCAACATGCCCAGCAGCAGACTGCCGGTGCTGATGCTTCTGCAAAC  
AACCGGAAAGATGACGATGTTGTGACGCTGAATTTGAAGAAGTCAAAGACAAAAAATAAA  
AGCTTGCGGCCGCATAATGCTTAAGTCGAACAGAAAGTAATCGTATTGTACACGGCCGCATA  
ATCGAAATTAATACGACTCACTATAGGGGAATTGTGAGCGGATAACAATTCCCCATCTTAGT  
ATATTAGTTAAGTATAAGAAGGAGATATACATATGGCAGATCTCAATTGGATATCGGCCGGC  
CACGCGATCGCTGACGTCGGTACCCTCGAGTCTGGTAAAGAAACCGCTGCTGCGAAATTTGA  
ACGCCAGCACATGGACTCGTCTACTAGCGCAGCTTAATTAACCTAGGCTGCTGCCACCGCTG  
AGCAATAACTAGCATAACCCCTTGGGGCCTCTAAACGGGTCTTGAGGGGGTTTTTTGCTGAAA  
CCTCAGGCATTTGAGAAGCACACGGTCACACTGCTTCCGGTAGTCAATAAACCGGTAAACCA  
GCAATAGACATAAGCGGCTATTTAACGACCCTGCCCTGAACCGACGACCGGGTCAATTTGC  
TTTCGAATTTCTGCCATTCATCCGCTTATTATCACTTATTCAGGCGTAGCACCAGGCGTTTAA  
GGGCACCAATAACTGCCTTAAAAAAATTACGCCCCGCCCTGCCACTCATCGCAGTACTGTTG  
TAATTCATTAAGCATTCTGCCGACATGGAAGCCATCACAGACGGCATGATGAACCTGAATCG  
CCAGCGGCATCAGCACCTTGTCGCCTTGCGTATAATATTTGCCCATAGTGAAAACGGGGGCG  
AAGAAGTTGTCCATATTGGCCACGTTTAAATCAAACCTGGTGAAACTACCCAGGGATTGGC  
TGAGACGAAAAACATATTCTCAATAAACCCCTTAGGGAAATAGGCCAGGTTTTACCGTAAC  
ACGCCACATCTTGCGAATATATGTGTAGAAACTGCCGAAATCGTCGTGGTATCACTCCAG  
AGCGATGAAAACGTTTCAGTTTGCTCATGGAAAACGGGTGTAACAAGGGTGAACACTATCCCA  
TATCACCAGCTCACCGTCTTTCATTGCCATACGGAACCTCCGGATGAGCATTATCAGGCGGGC

AAGAATGTGAATAAAGGCCGGATAAACTTGTGCTTATTTTTCTTTACGGTCTTTAAAAAGGC  
CGTAATATCCAGCTGAACGGTCTGGTTATAGGTACATTGAGCAACTGACTGAAATGCCTCAA  
AATGTTCTTTACGATGCCATTGGGATATATCAACGGTGGTATATCCAGTGATTTTTTTCTCCAT  
TTTAGCTTCCTTAGCTCCTGAAAATCTCGATAACTCAAAAAATACGCCCGGTAGTGATCTTAT  
TTCATTATGGTGAAAGTTGGAACCTCTTACGTGCCGATCAACGTCTCATTTTCGCCAAAAGTT  
GGCCCAGGGCTTCCCGGTATCAACAGGGACACCAGGATTTATTTATTCTGCGAAGTGATCTTC  
CGTCACAGGTATTTATTCGGCGCAAAGTGCGTCGGGTGATGCTGCCAACTTACTGATTTAGTG  
TATGATGGTGTTTTTGAGGTGCTCCAGTGGCTTCTGTTTCTATCAGCTGTCCCTCCTGTTACAG  
TACTGACGGGGTGGTGCGTAACGGCAAAGCACCGCCGGACATCAGCGCTAGCGGAGTGTA  
TACTGGCTTACTATGTTGGCACTGATGAGGGTGTCAAGTGAAGTGCTTCATGTGGCAGGAGAA  
AAAAGGCTGCACCGGTGCGTCAGCAGAATATGTGATACAGGATATATTCCGCTTCCTCGCTC  
ACTGACTCGCTACGCTCGGTCTGACTGCGGCGAGCGGAAATGGCTTACGAACGGGGCGG  
AGATTTCCCTGGAAGATGCCAGGAAGATACTTAACAGGGAAGTGAGAGGGCCGCGGCAAAGC  
CGTTTTTCCATAGGCTCCGCCCCCTGACAAGCATCACGAAATCTGACGCTCAAATCAGTGGT  
GGCGAAACCCGACAGGACTATAAAGATAACCAGGCGTTTCCCCTGGCGGCTCCCTCGTGCGCT  
CTCCTGTTCCCTGCCTTTTCGGTTTACCGGTGTCATTCCGCTGTTATGGCCGCGTTTGTCTCATTC  
CACGCCTGACACTCAGTTCGGGGTAGGCAGTTCGCTCCAAGCTGGACTGTATGCACGAACCC  
CCCGTTCAGTCCGACCGCTGCGCCTTATCCGGTAACATCGTCTTGAGTCCAACCCGGAAGA  
CATGCAAAGCACCACTGGCAGCAGCCACTGGTAATTGATTTAGAGGAGTTAGTCTTGAAGT  
CATGCGCCGGTTAAGGCTAAACTGAAAGGACAAGTTTTGGTGACTGCGCTCCTCCAAGCCAG  
TTACCTCGGTTCAAAGAGTTGGTAGCTCAGAGAACCTTCGAAAAACCGCCCTGCAAGGCGGT  
TTTTTCGTTTTTCAGAGCAAGAGATTACGCGCAGACCAAACGATCTCAAGAAGATCATCTTA  
TTAATCAGATAAAATATTTCTAGATTTTCAAGTGAATTTATCTCTTCAAATGTAGCACCTGAAG  
TCAGCCCCATACGATATAAGTTGTAATTCTCATGTTAGTCATGCCCCGCGCCACCGGAAGG  
AGCTGACTGGGTGTAAGGCTCTCAAGGGCATCGGTGAGATCCCGGTGCCTAATGAGTGAGC  
TAACTTACATTAATTGCGTTGCGCTCACTGCCCGCTTTCAGTCGGGAAACCTGTCGTGCCAG  
CTGCATTAATGAATCGGCCAACGCGCGGGGAGAGGCGGTTTGCCTATTGGGCGCCAGGGTGG  
TTTTTCTTTTACCAGTGAGACGGGCAACAGCTGATTGCCCTTACCAGCCTGGCCCTGAGAGA  
GTTGCAGCAAGCGGTCCACGCTGGTTTGGCCCAGCAGGCGAAAATCCTGTTTGATGGTGGTT  
AACGGCGGGATATAACATGAGCTGTCTTCGGTATCGTCGTATCCCACTACCGAGATGTCCGC  
ACCAACGCGCAGCCCGGACTCGGTAATGGCGCGCATTGCGCCAGCGCCATCTGATCGTTGG  
CAACCAGCATCGCAGTGGGAACGATGCCCTCATTAGCATTGTCATGGTTTGTGAAAACCG  
GACATGGCACTCCAGTCGCCTTCCCGTTCCGCTATCGGCTGAATTTGATTGCGAGTGAGATAT  
TTATGCCAGCCAGCCAGACGCGAGACGCGCCGAGACAGAACTTAATGGGCCCCTAACAGCG

CGATTTGCTGGTGACCCAATGCGACCAGATGCTCCACGCCAGTCGCGTACCGTCTTCATGG  
GAGAAAATAATACTGTTGATGGGTGTCTGGTCAGAGACATCAAGAAATAACGCCGGAACATT  
AGTGCAGGCAGCTTCCACAGCAATGGCATCCTGGTCATCCAGCGGATAGTTAATGATCAGCC  
CACTGACGCGTTGCGCGAGAAGATTGTGCACCGCCGCTTTACAGGCTTCGACGCCGCTTCGTT  
CTACCATCGACACCACCACGCTGGCACCCAGTTGATCGGCGCGAGATTTAATCGCCGCGACA  
ATTTGCGACGGCGCGTGCAGGGCCAGACTGGAGGTGGCAACGCCAATCAGCAACGACTGTTT  
GCCCGCCAGTTGTTGTGCCACGCGGTTGGGAATGTAATTCAGCTCCGCCATCGCCGCTTCCAC  
TTTTTCCCGCGTTTTTCGCAGAAACGTGGCTGGCCTGGTTCACCACGCGGAAACGGTCTGATA  
AGAGACACCGGCATACTCTGCGACATCGTATAACGTTACTGGTTTCACATTCACCACCCTGA  
ATTGACTCTCTTCCGGGCGCTATCATGCCATACCGCGAAAGGTTTTGCGCCATTCGATGGTGT  
CCGGGATCTCGACGCTCTCCCTTATGCGACTCCTGCATTAGGAAATTAATACGACTCACTATA

i. pDuet::DnaJ

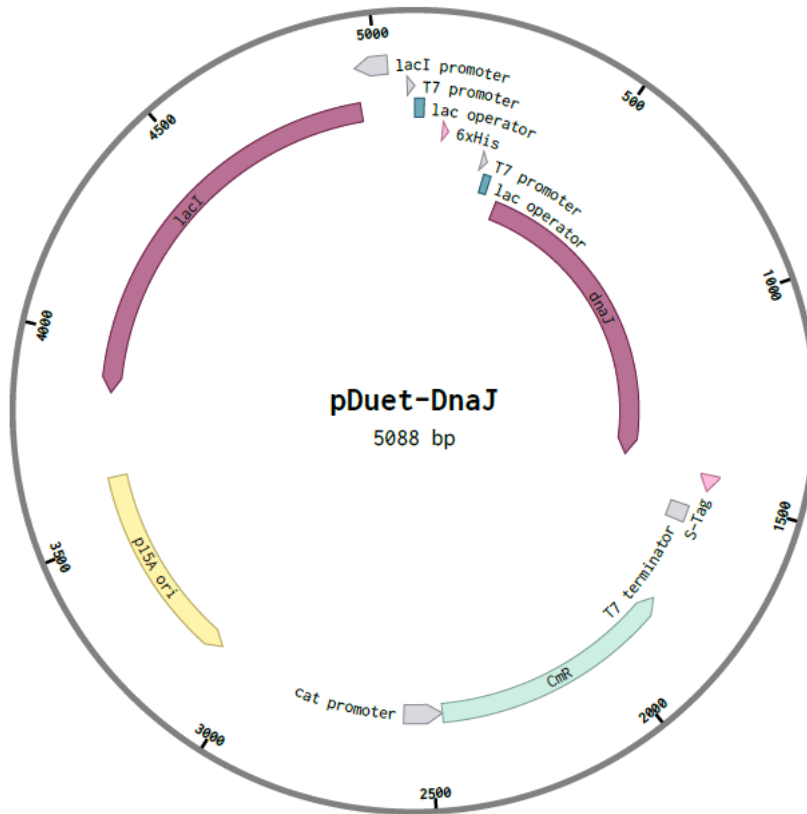

GGGGAATTGTGAGCGGATAACAATCCCCTGTAGAAATAATTTTGTTTAACTTTAATAAGGA  
 GATATACCATGGGCAGCAGCCATCACCATCATCACCACAGCCAGGATCCGAATTCGAGCTCG  
 GCGCGCCTGCAGGTCGACAAGCTTGCGGCCGCATAATGCTTAAGTCGAACAGAAAGTAATCG  
 TATTGTACACGGCCGCATAATCGAAATTAATACGACTCACTATAGGGGAATTGTGAGCGGAT  
 AACAAATCCCCTCTTAGTATATTAGTTAAGTATAAGAAGGAGATATACATATGATGGCTAA  
 GCAAGATTATTACGAGATTTTAGGCGTTTCCAAAACAGCGGAAGAGCGTGAAATCAGAAAG  
 GCCTACAAACGCCTGGCCATGAAATACCACCCGGACCGTAACCAGGGTGACAAAGAGGCCG  
 AGGCGAAATTTAAAGAGATCAAGGAAGCTTATGAAGTTCTGACCGACTCGCAAAAACGTGC  
 GGCATACGATCAGTATGGTCATGCTGCGTTTGAGCAAGGTGGCATGGGCGGCGGGCTTTTG  
 GCGGCGGCGCAGACTTCAGCGATATTTTGGTGACGTTTTTCGGCGATATTTTGGCGGCGGAC  
 GTGGTCGTCAACGTGCGGCGCGGGTGCTGATTTACGCTATAACATGGAGCTCACCTCGAA  
 GAAGCTGTACGTGGCGTGACCAAAGAGATCCGCATTCCGACTCTGGAAGAGTGTGACGTTTG  
 CCACGGTAGCGGTGCAAAACCAGGTACACAGCCGCAGACTTGTCCGACCTGTCATGGTTCTG  
 GTCAGGTGCAGATGCGCCAGGGATTCTTCGCTGTACAGCAGACCTGTCCACACTGTCAGGGC  
 CGCGGTACGCTGATCAAAGATCCGTGCAACAAATGTCATGGTCATGGTCGTGTTGAGCGCAG  
 CAAAACGCTGTCCGTTAAAATCCCGGCAGGGGTGGACACTGGAGACCGCATCCGTCTTGCGG

GCGAAGGTGAAGCGGGCGAGCATGGCGCACCGGCAGGCGATCTGTACGTTTCAGGTTTCAGGT  
TAAACAGCACCCGATTTTCGAGCGTGAAGGCAACAACCTGTATTGCGAAGTCCCGATCAACT  
TCGCTATGGCGGCGCTGGGTGGCGAAATCGAAGTACCGACCCTTGATGGTTCGCGTCAAACCTG  
AAAGTGCCTGGCGAAACCCAGACCGGTAAGCTATTCCGTATGCGCGGTAAAGGCGTCAAGTC  
TGTCCGCGGTGGCGCACAGGGTGATTTGCTGTGCCGCGTTGTCGTCGAAACACCGGTAGGCC  
TGAACGAAAGGCAGAAACAGCTGCTGCAAGAGCTGCAAGAAAGCTTCGGTGGCCCAACCGG  
CGAGCACAACAGCCC GCGCTCAAAGAGCTTCTTTGATGGTGTGAAGAAGTTTTTTGACGACC  
TGACCCGCTAACTCGAGTCTGGTAAAGAAACCGCTGCTGCGAAATTTGAACGCCAGCACATG  
GACTCGTCTACTAGCGCAGCTTAATTAACCTAGGCTGCTGCCACCGCTGAGCAATAACTAGC  
ATAACCCCTTGGGGCCTCTAAACGGGTCTTGAGGGGTTTTTTGCTGAAACCTCAGGCATTTGA  
GAAGCACACGGTCCACTGCTTCCGGTAGTCAATAAACCGGTAAACCAGCAATAGACATAA  
GCGGCTATTTAACGACCCTGCCCTGAACCGACGACCGGGTCGAATTTGCTTTTGAATTTCTGC  
CATTCATCCGCTTATTATCACTTATTCAGGCGTAGCACCAGGCGTTTAAGGGCACCAATAACT  
GCCTTAAAAAATTACGCCCCGCCCTGCCACTCATCGCAGTACTGTTGTAATTCATTAAGCAT  
TCTGCCGACATGGAAGCCATCACAGACGGCATGATGAACCTGAATCGCCAGCGGCATCAGCA  
CCTTGTCGCCTTGCGTATAATATTTGCCCATAGTGAAAACGGGGGCGAAGAAGTTGTCCATA  
TTGGCCACGTTTAAATCAAACTGGTGAAACTCACCCAGGGATTGGCTGAGACGAAAAACAT  
ATTCTCAATAAACCCCTTAGGGAAATAGGCCAGGTTTTACCGTAACACGCCACATCTTGCG  
AATATATGTGTAGAACTGCCGAAATCGTCGTGGTATTCCTCCAGAGCGATGAAAACGTT  
TCAGTTTGCTCATGGAAAACGGTGTAAACAAGGGTGAACACTATCCCATATCACCAGCTCACC  
GTCTTTCATTGCCATACGGAACCTCCGGATGAGCATTTCATCAGGCGGGCAAGAATGTGAATAA  
AGGCCGATAAACTTGTGCTTATTTTTCTTTACGGTCTTTAAAAAGGCCGTAATATCCAGCT  
GAACGGTCTGGTTATAGGTACATTGAGCAACTGACTGAAATGCCTCAAAATGTTCTTTACGA  
TGCCATTGGGATATATCAACGGTGGTATATCCAGTGATTTTTTTCTCCATTTTAGCTTCCTTAG  
CTCCTGAAAATCTCGATAACTCAAAAAATACGCCCGGTAGTGATCTTATTTTCATTATGGTGAA  
AGTTGGAACCTCTTACGTGCCGATCAACGTCTCATTTTCGCCAAAAGTTGGCCCAGGGCTTCC  
CGGTATCAACAGGGACACCAGGATTTATTTATTCTGCGAAGTGATCTTCCGTCACAGGTATTT  
ATTCGGCGCAAAGTGCGTCGGGTGATGCTGCCAACTTACTGATTTAGTGATGATGGTGTTTT  
TGAGGTGCTCCAGTGGCTTCTGTTTCTATCAGCTGTCCCTCCTGTTTCAGCTACTGACGGGGTG  
GTGCGTAACGGCAAAAGCACCGCCGACATCAGCGCTAGCGGAGTGTATACTGGCTTACTAT  
GTTGGCACTGATGAGGGTGTGAGTGAAGTGCTTCATGTGGCAGGAGAAAAAGGCTGCACC  
GGTGCGTCAGCAGAATATGTGATACAGGATATATTCGCTTCTCCTCGCTCACTGACTCGCTACG  
CTCGGTTCGTTGACTGCGGCGAGCGGAAATGGCTTACGAACGGGGCGGAGATTTCTGGAAG  
ATGCCAGGAAGATACTTAACAGGGAAGTGAGAGGGCCGCGGCAAAGCCGTTTTTCCATAGG



CTCCGCCCCCTGACAAGCATCACGAAATCTGACGCTCAAATCAGTGGTGGCGAAACCCGAC  
AGGACTATAAAGATAACCAGGCGTTTCCCCTGGCGGCTCCCTCGTGCGCTCTCCTGTTCTGCC  
TTTCGGTTTACCGGTGTCATTCCGCTGTTATGGCCGCGTTTGTCTCATTCCACGCCTGACACTC  
AGTTCCGGGTAGGCAGTTCGCTCCAAGCTGGACTGTATGCACGAACCCCCGTTTCAGTCCGA  
CCGCTGCGCCTTATCCGGTAACTATCGTCTTGAGTCCAACCCGGAAAGACATGCAAAAGCAC  
CACTGGCAGCAGCCACTGGTAATTGATTTAGAGGAGTTAGTCTTGAAGTCATGCGCCGGTTA  
AGGCTAAACTGAAAGGACAAGTTTTGGTGACTGCGCTCCTCCAAGCCAGTTACCTCGGTTCA  
AAGAGTTGGTAGCTCAGAGAACCTTCGAAAAACCGCCCTGCAAGGCGGTTTTTTTCGTTTTCA  
GAGCAAGAGATTACGCGCAGACCAAAACGATCTCAAGAAGATCATCTTATTAATCAGATAA  
AATATTTCTAGATTTTCAGTGCAATTTATCTCTTCAAATGTAGCACCTGAAGTCAGCCCCATAC  
GATATAAGTTGTAATTCTCATGTTAGTCATGCCCCGCGCCACCGGAAGGAGCTGACTGGGT  
TGAAGGCTCTCAAGGGCATCGGTTCGAGATCCCGGTGCCTAATGAGTGAGCTAACTTACATTA  
ATTGCGTTGCGCTCACTGCCCGCTTTCAGTCGGGAAACCTGTTCGTGCCAGCTGCATTAATGA  
ATCGGCCAACGCGCGGGGAGAGGCGGTTTTCGTATTGGGCGCCAGGGTGGTTTTTTCTTTTCA  
CCAGTGAGACGGGCAACAGCTGATTGCCCTTACCGCCTGGCCCTGAGAGAGTTGCAGCAAG  
CGGTCCACGCTGGTTTGGCCCAGCAGGCGAAAATCCTGTTTGATGGTGGTTAACGGCGGGAT  
ATAACATGAGCTGTCTTCGGTATCGTTCGTATCCCACTACCGAGATGTCCGCACCAACGCGCA  
GCCCCGACTCGGTAATGGCGCGCATTGCGCCAGCGCCATCTGATCGTTGGCAACCAGCATC  
GCAGTGGGAACGATGCCCTCATTACGATTTGTCATGGTTTGTGAAAACCGGACATGGCACT  
CCAGTCGCCTTCCCGTTCGCTATCGGCTGAATTTGATTGCGAGTGAGATATTTATGCCAGCC  
AGCCAGACGCAGACGCGCCGAGACAGAACTTAATGGGCCCCGCTAACAGCGCGATTTGCTGG  
TGACCCAATGCGACCAGATGCTCCACGCCAGTCGCGTACCGTCTTCATGGGAGAAAATAAT  
ACTGTTGATGGGTGTCTGGTCAGAGACATCAAGAAATAACGCCGGAACATTAGTGCAGGCAG  
CTTCCACAGCAATGGCATCCTGGTCATCCAGCGGATAGTTAATGATCAGCCCCTGACGCGT  
TGCGCGAGAAGATTGTGCACCGCCGCTTTACAGGCTTCGACGCCGCTTCGTTCTACCATCGAC  
ACCACCACGCTGGCACCCAGTTGATCGGCGCGAGATTTAATCGCCGCGACAATTTGCGACGG  
CGCGTGCAGGGCCAGACTGGAGGTGGCAACGCCAATCAGCAACGACTGTTTGGCCGCCAGTT  
GTTGTGCCACGCGGTTGGGAATGTAATTCAGCTCCGCCATCGCCGCTTCCACTTTTTCCCGCG  
TTTTCGCAGAAACGTGGCTGGCCTGGTTACCACGCGGGAAACGGTCTGATAAGAGACACCG  
GCATACTCTGCGACATCGTATAACGTTACTGGTTTACATTCACCACCCTGAATTGACTCTCT  
TCCGGGCGCTATCATGCCATAACCGCGAAAGTTTTGCGCCATTCGATGGTGTCCGGGATCTCG  
ACGCTCTCCCTTATGCGACTCCTGCATTAGGAAATTAATACGACTCACTATA

j. pDuet::DnaKJ

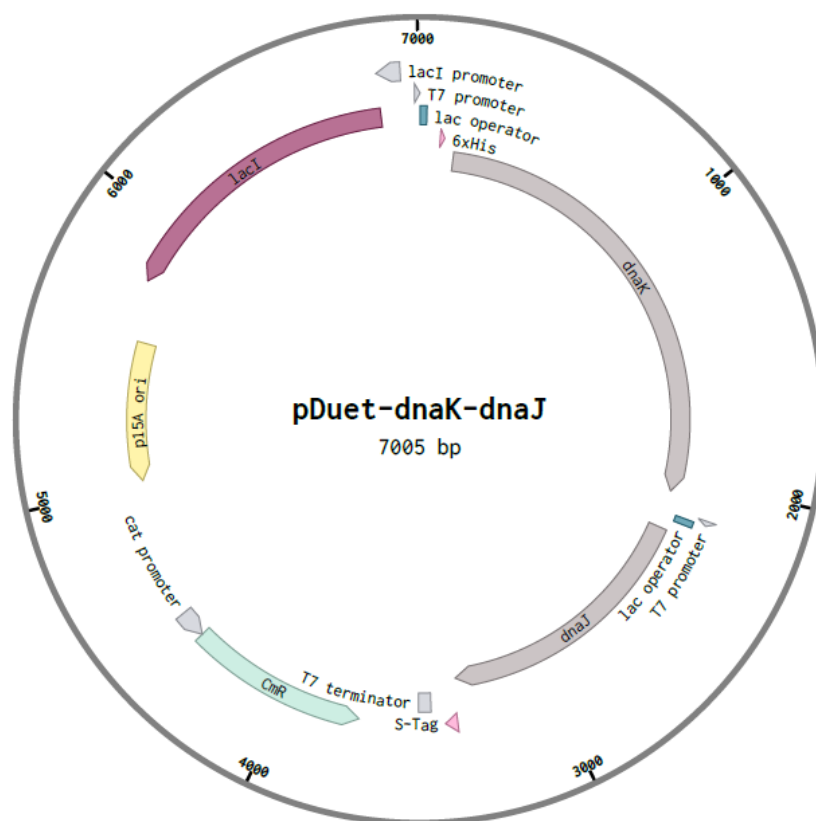

GGGAATTGTGAGCGGATAACAATTCCTGTAGAAATAATTTGTTAACTTTAATAAGGA  
GATATACCATGGGCAGCAGCCATCACCATCATCACCACAGCCAGGATCCGAATTCGAGCTCG  
GCGCGCCTGCAGGTCGACATGGGTAAAATAATTGGTATCGACCTGGGTACTACCAACTCTTG  
TGTAGCGATTATGGATGGCACCCTCCTCGCGTGCTGGAGAACGCCGAAGGCGATCGCACCA  
CGCCTTCTATCATTGCCTATACCCAGGATGGTGAACTCTAGTTGGTCAGCCGGCTAAACGTC  
AGGCAGTGACGAACCCGAAAACACTCTGTTTTCGATTAAACGCCTGATTGGTCGCCGCTTC  
CAGGACGAAGAAGTACAGCGTGATGTTTCCATCATGCCGTTCAAATTATTGCTGCTGATAA  
CGGCGACGCATGGGTTCGAAGTTAAAGGCCAGAAAATGGCACCGCCGAGATTTCTGCTGAA  
GTGCTGAAAAAATGAAGAAAACCGCTGAAGATTACCTGGGTGAACCGGTAAGTGAAGCTG  
TTATCACCGTACCGGCATACTTTAACGATGCTCAGCGTCAGGCAACCAAAGACGCAGGCCGT  
ATCGCTGGTCTGGAAGTAAAACGTATCATCAACGAACCGACCGCAGCTGCGCTGGCTTACGG  
TCTGGACAAAGGCACTGGCAACCGTACTATCGCGGTTTATGACCTGGGTGGTGGTACTTTCG  
ATATTTCTATTATCGAAATCGACGAAGTTGACGGCGAAAAACCTTCGAAGTTCTGGCAACC  
AACGGTGATACCCACCTGGGGGGTGAAGACTTCGACAGCCGTCTGATCAACTATCTGGTTGA  
AGAATTCAAGAAAGATCAGGGCATTGACCTGCGCAACGATCCGCTGGCAATGCAGCGCCTG  
AAAGAAGCGGCAGAAAAAGCGAAAATCGAACTGTCTTCCGCTCAGCAGACCGACGTTAACC

TGCCATACATCACTGCAGACGCGACCGGTCCGAAACACATGAACATCAAAGTGACTCGTGCG  
AAACTGGAAAGCCTGGTTGAAGATCTGGTAAACCGTTCCATTGAGCCGCTGAAAGTTGCACT  
GCAGGACGCTGGCCTGTCCGTATCTGATATCGACGACGTTATCCTCGTTGGTGGTCAGACTCG  
TATGCCAATGGTTCAGAAGAAAGTTGCTGAGTTCTTTGGTAAAGAGCCGCGTAAAGACGTTA  
ACCCGGACGAAGCTGTAGCAATCGGTGCTGCTGTTCAAGGGTGGTGTCTGACTGGTGACGTA  
AAAGACGTACTGCTGCTGGACGTTACCCCGCTGTCTCTGGGTATCGAAACCATGGGCGGTGT  
GATGACGACGCTGATCGCGAAAAACACCACTATCCCGACCAAGCACAGCCAGGTGTTCTCTA  
CCGCTGAAGACAACCAGTCTGCGGTAACCATCCATGTGCTGCAGGGTGAACGTAAACGTGCG  
GCTGATAACAAATCTCTGGGTCAGTTCAACCTAGATGGTATCAACCCGGCACCCGCGCGGCAT  
GCCGCAGATCGAAGTTACCTTCGATATCGATGCTGACGGTATCCTGCACGTTTCCGCGAAAG  
ATAAAAACAGCGGTAAAGAGCAGAAGATCACCATCAAGGCTTCTTCTGGTCTGAACGAAGA  
TGAAATCCAGAAAATGGTACGCGACGCAGAAGCTAACGCCGAAGCTGACCGTAAGTTTGAA  
GAGCTGGTACAGACTCGCAACCAGGGCGACCATCTGCTGCACAGCACCCGTAAGCAGGTTGA  
AGAAGCAGGCGACAAACTGCCGGCTGACGACAAAACCTGCTATCGAGTCTGCGCTGACTGCA  
CTGGAAACTGCTCTGAAAGGTGAAGACAAAGCCGCTATCGAAGCGAAAATGCAGGAACTGG  
CACAGGTTTCCAGAAACTGATGGAAATCGCCCAGCAGCAACATGCCCAGCAGCAGACTGCC  
GGTCTGATGCTTCTGCAAACAACGCGAAAGATGACGATGTTGTGACGCTGAATTTGAAGA  
AGTCAAAGACAAAAATAAAAGCTTGCGGCCGCATAATGCTTAAGTCGAACAGAAAGTAAT  
CGTATTGTACACGGCCGCATAATCGAAATTAATACGACTCACTATAGGGGAATTGTGAGCGG  
ATAACAATTCCCATCTTAGTATATTAGTTAAGTATAAGAAGGAGATATACATATGATGGCT  
AAGCAAGATTATTACGAGATTTTAGGCGTTTCCAAAACAGCGGAAGAGCGTGAAATCAGAA  
AGGCTACAAACGCCTGGCCATGAAATACCACCCGGACCGTAACCAGGGTGACAAAGAGGC  
CGAGGCGAAATTTAAAGAGATCAAGGAAGCTTATGAAGTTCTGACCGACTCGCAAAAACGT  
GCGGCATACGATCAGTATGGTCATGCTGCGTTTGAGCAAGGTGGCATGGGCGGCGGGGTTT  
TGGCGGCGGCGCAGACTTCAGCGATATTTTTGGTGACGTTTTTCGGCGATATTTTTGGCGGCGG  
ACGTGGTTCGTCAACGTGCGGCGCGCGGTGCTGATTTACGCTATAACATGGAGCTCACCTCG  
AAGAAGCTGTACGTGGCGTGACCAAAGAGATCCGCATTCCGACTCTGGAAGAGTGTGACGTT  
TGCCACGGTAGCGGTGCAAAACCAGGTACACAGCCGCAGACTTGTCCGACCTGTCATGGTTC  
TGGTCAGGTGCAGATGCGCCAGGGATTCTTCGCTGTACAGCAGACCTGTCCACACTGTCAGG  
GCCGCGGTACGCTGATCAAAGATCCGTGCAACAAATGTCATGGTCATGGTTCGTGTTGAGCGC  
AGCAAAACGCTGTCCGTTAAAATCCCGGCAGGGGTGGACACTGGAGACCGCATCCGTCTTGC  
GGGCGAAGGTGAAGCGGGCGAGCATGGCGCACCCGGCAGGCGATCTGTACGTTCAAGTTTCA  
GTTAAACAGCACCCGATTTTCGAGCGTGAAGGCAACAACCTGTATTGCGAAGTCCCGATCAA  
CTTCGCTATGGCGGCGCTGGGTGGCGAAATCGAAGTACCGACCCTTGATGGTTCGCGTCAAAC

TGAAAGTGCCTGGCGAAACCCAGACCGGTAAGCTATTCCGTATGCGCGGTAAGGGCGTCAAG  
TCTGTCCGCGGTGGCGCACAGGGTGATTTGCTGTGCCGCGTTGTCGTCGAAACACCGGTAGG  
CCTGAACGAAAGGCAGAAACAGCTGCTGCAAGAGCTGCAAGAAAGCTTCGGTGGCCCAACC  
GGCGAGCACAACAGCCC GCGCTCAAAGAGCTTCTTTGATGGTGTGAAGAAGTTTTTTGACGA  
CCTGACCCGCTAACTCGAGTCTGGTAAAGAAACCGCTGCTGCGAAATTTGAACGCCAGCACA  
TGGACTCGTCTACTAGCGCAGCTTAATTAACCTAGGCTGCTGCCACCGCTGAGCAATAACTA  
GCATAACCCCTTGGGGCCTCTAAACGGGTCTTGAGGGGTTTTTTGCTGAAACCTCAGGCATTT  
GAGAAGCACACGGTCACTGCTTCCGGTAGTCAATAAACCGGTAAACCAGCAATAGACAT  
AAGCGGCTATTTAACGACCCTGCCCTGAACCGACGACCGGGTCGAATTTGCTTTCGAATTTCT  
GCCATTCATCCGCTTATTATCACTTATTCAGGCGTAGCACCAGGCGTTTAAGGGCACCAATAA  
CTGCCTTAAAAAATTACGCCCCGCCCTGCCACTCATCGCAGTACTGTTGTAATTCATTAAGC  
ATTCTGCCGACATGGAAGCCATCACAGACGGCATGATGAACCTGAATCGCCAGCGGCATCAG  
CACTTGTCGCTTGCGTATAATATTTGCCATAGTAAAACGGGGGCGAAGAAGTTGTCCA  
TATTGGCCACGTTTAAATCAAACCTGGTGAACCTCACCCAGGGATTGGCTGAGACGAAAAAC  
ATATTCTCAATAAACCCTTTAGGGAAATAGGCCAGGTTTTTCACCGTAACACGCCACATCTTGC  
GAATATATGTGTAGAACTGCCGGAAATCGTCGTGGTATTCCTCCAGAGCGATGAAAACGT  
TTCAGTTTGCTCATGGAAAACGGTGTAAACAAGGGTGAACACTATCCCATATCACCAGCTCAC  
CGTCTTTCATTGCCATACGGAACCTCCGGATGAGCATTATCAGGCGGGCAAGAATGTGAATA  
AAGGCCGGATAAAACTTGTGCTTATTTTTCTTTACGGTCTTTAAAAGGCCGTAATATCCAGC  
TGAACGGTCTGGTTATAGGTACATTGAGCAACTGACTGAAATGCCTCAAATGTTCTTTACG  
ATGCCATTGGGATATATCAACGGTGGTATATCCAGTGATTTTTTTCTCCATTTTAGCTTCCTTA  
GCTCCTGAAAATCTCGATAACTCAAAAAATACGCCCGGTAGTGATCTTATTTTATTATGGTGA  
AAGTTGGAACCTCTTACGTGCCGATCAACGTCTCATTTCGCCAAAAGTTGGCCCAGGGCTTC  
CCGGTATCAACAGGGACACCAGGATTTATTTATTCTGCGAAGTGATCTTCCGTCACAGGTATT  
TATTCGGCGCAAAGTGCGTCCGGTGTGCTGCCAACTTACTGATTTAGTGTATGATGGTGT  
TTGAGGTGCTCCAGTGGCTTCTGTTTCTATCAGCTGTCCCTCCTGTTTCCAGCTACTGACGGGGT  
GGTGCGTAACGGCAAAGCACCGCCGGACATCAGCGCTAGCGGAGTGTATACTGGCTTACTA  
TGTTGGCACTGATGAGGGTGTGAGTGAAGTGCTTCATGTGGCAGGAGAAAAAGGCTGCACC  
GGTGCCTCAGCAGAATATGTGATACAGGATATATCCGCTTCCCTCGCTCACTGACTCGCTACG  
CTCGGTGCTTCGACTGCGGCGAGCGGAAATGGCTTACGAACGGGGCGGAGATTTCTGGAAG  
ATGCCAGGAAGATACTTAACAGGGAAGTGAGAGGGCCGCGGCAAAGCCGTTTTTCCATAGG  
CTCCGCCCCCTGACAAGCATCACGAAATCTGACGCTCAAATCAGTGGTGGCGAAACCCGAC  
AGGACTATAAAGATAACCAGGCGTTTTCCCTGGCGGCTCCCTCGTGCGCTCTCCTGTTCTGCC  
TTTTCGGTTTACCGGTGTCATTCCGCTGTTATGGCCGCGTTTGTCTCATTCCACGCCTGACACTC

AGTTCGGGTAGGCAGTTCGCTCCAAGCTGGACTGTATGCACGAACCCCCGTTTCAGTCCGA  
CCGCTGCGCCTTATCCGGTAACTATCGTCTTGAGTCCAACCCGGAAAGACATGCAAAAGCAC  
CACTGGCAGCAGCCACTGGTAATTGATTTAGAGGAGTTAGTCTTGAAGTCATGCGCCGGTTA  
AGGCTAAACTGAAAGGACAAGTTTTGGTGACTGCGCTCCTCCAAGCCAGTTACCTCGGTTCA  
AAGAGTTGGTAGCTCAGAGAACCTTCGAAAAACCGCCCTGCAAGGCGGTTTTTTTCGTTTTCA  
GAGCAAGAGATTACGCGCAGACAAAACGATCTCAAGAAGATCATCTTATTAATCAGATAA  
AATATTTCTAGATTTAGTGCAATTTATCTCTCAAATGTAGCACCTGAAGTCAGCCCCATAC  
GATATAAGTTGTAATTCTCATGTTAGTCATGCCCCGCGCCCACCGGAAGGAGCTGACTGGGT  
TGAAGGCTCTCAAGGGCATCGGTTCGAGATCCCGGTGCCTAATGAGTGAGCTAACTTACATTA  
ATTGCGTTGCGCTCACTGCCCGCTTTCCAGTCGGGAAACCTGTTCGTGCCAGCTGCATTAATGA  
ATCGGCCAACGCGCGGGGAGAGGCGGTTTTCGTATTGGGCGCCAGGGTGGTTTTTCTTTTCA  
CCAGTGAGACGGGCAACAGCTGATTGCCCTTACCGCCTGGCCCTGAGAGAGTTGCAGCAAG  
CGGTCCACGCTGGTTTGGCCAGCAGGCGAAAATCCTGTTTGATGGTGGTTAACGGCGGGAT  
ATAACATGAGCTGTCTTCGGTATCGTCGTATCCACTACCGAGATGTCCGCACCAACGCGCA  
GCCCGGACTCGGTAATGGCGCGCATTGCGCCAGCGCCATCTGATCGTTGGCAACCAGCATC  
GCAGTGGGAACGATGCCCTCATTACAGCATTTGCATGGTTTTGTTGAAAACCGGACATGGCACT  
CCAGTCGCCTTCCCGTTCCGCTATCGGCTGAATTTGATTGCGAGTGAGATATTTATGCCAGCC  
AGCCAGACGCAGACGCGCCGAGACAGAACTTAATGGGCCCGCTAACAGCGCGATTTGCTGG  
TGACCCAATGCGACCAGATGCTCCACGCCAGTCGCGTACCGTCTTCATGGGAGAAAATAAT  
ACTGTTGATGGGTGTCTGGTCAGAGACATCAAGAAATAACGCCGGAACATTAGTGCAGGCAG  
CTTCCACAGCAATGGCATCCTGGTCATCCAGCGGATAGTTAATGATCAGCCCCTGACGCGT  
TGCGCGAGAAGATTGTGCACCGCCGCTTTACAGGCTTCGACGCCGCTTCGTTCTACCATCGAC  
ACCACCACGCTGGCACCCAGTTGATCGGCGCGAGATTTAATCGCCGCGACAATTTGCGACGG  
CGCGTGCAGGGCCAGACTGGAGGTGGCAACGCCAATCAGCAACGACTGTTTGCCCGCCAGTT  
GTTGTGCCACGCGGTTGGGAATGTAATTCAGCTCCGCCATCGCCGCTTCCACTTTTTCCCGCG  
TTTTCGCAGAAACGTGGCTGGCCTGGTTCACCACGCGGGAAACGGTCTGATAAGAGACACCG  
GCATACTCTGCGACATCGTATAACGTTACTGGTTTTACATTCACCACCCTGAATTGACTCTCT  
TCCGGGCGCTATCATGCCATAACCGCGAAAGTTTTGCGCCATTCGATGGTGTCCGGGATCTCG  
ACGCTCTCCCTTATGCGACTCCTGCATTAGGAAATTAATACGACTCACTATA

k. pDuet::IbpA

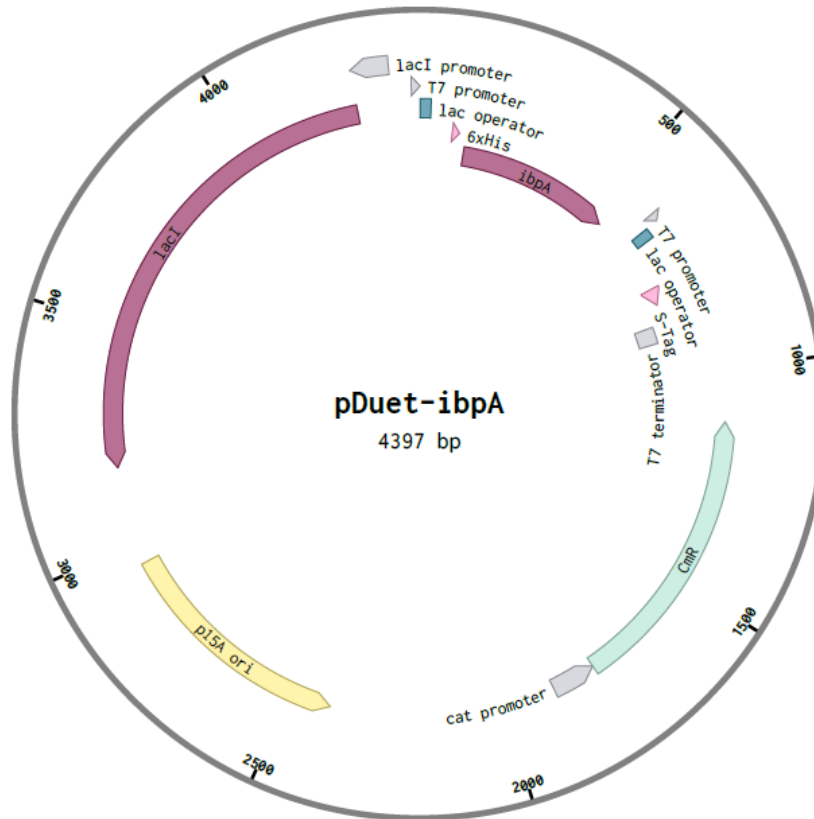

GGGGAATTGTGAGCGGATAACAATTCCTGTAGAAATAATTTGTTTAACTTTAATAAGGA  
 GATATACCATGGGCAGCAGCCATCACCATCATCACCACAGCCAGGATCCGAATTCATGCGTA  
 ACTTTGATTTATCCCCGCTTTACCGTTCTGCTATTGGATTTGACCGTTTGTTTAACCACTTAGA  
 AAACAACCAGAGCCAGAGTAATGGCGGCTACCCTCCGTATAACGTTGAACTGGTAGACGAA  
 AACCATTACCGCATTGCTATCGCTGTGGCTGGTTTTGCTGAGAGCGAACTGGAAATTACCGCC  
 CAGGATAATCTGCTGGTGGTGAAGGTGCTCACGCCGACGAACAAAAAGAGCGCACCTATCT  
 GTACCAGGGCATCGCTGAACGCAACTTTGAACGCAAATTCAGTTAGCTGAGAACATTCATG  
 TTCGTGGTGCTAACCTGGTAAATGGTTTGCTGTATATCGATCTCGAACGCGTGATTCCGGAAG  
 CGAAAAAACCGCGCCGTATCGAAATCAACTAAAAGCTTGCGGCCGCATAATGCTTAAGTCGA  
 ACAGAAAGTAATCGTATTGTACACGGCCGCATAATCGAAATTAATACGACTCACTATAGGGG  
 AATTGTGAGCGGATAACAATTCCTCATCTTAGTATATTAGTTAAGTATAAGAAGGAGATATA  
 CATATGGCAGATCTCAATTGGATATCGGCCGGCCACGCGATCGCTGACGTCCGTACCCTCGA  
 GTCTGGTAAAGAAACCGCTGCTGCGAAATTTGAACGCCAGCACATGGACTCGTCTACTAGCG  
 CAGCTTAATTAACCTAGGCTGCTGCCACCGCTGAGCAATAACTAGCATAACCCCTTGGGGCC  
 TCTAAACGGGTCTTGAGGGGTTTTTTGCTGAAACCTCAGGCATTTGAGAAGCACACGGTCAC  
 ACTGCTTCCGGTAGTCAATAAACCGGTAAACCAGCAATAGACATAAGCGGCTATTTAACGAC

CCTGCCCTGAACCGACGACCGGGTCTGAATTTGCTTTCTGAATTTCTGCCATTCATCCGCTTATT  
ATCACTTATTCAGGCGTAGCACCAGGCGTTTAAGGGCACCAATAACTGCCTTAAAAAATTA  
CGCCCCGCCCTGCCACTCATCGCAGTACTGTTGTAATTCATTAAGCATTCTGCCGACATGGAA  
GCCATCACAGACGGCATGATGAACCTGAATCGCCAGCGGCATCAGCACCTTGTCGCCTTGCG  
TATAATATTTGCCCATAGTGAAAACGGGGGCGAAGAAGTTGTCCATATTGGCCACGTTTAAA  
TCAAAACTGGTGAAACTCACCCAGGATTGGCTGAGACGAAAAACATATTCTCAATAAACCC  
TTTAGGGAAATAGGCCAGGTTTTACCGTAACACGCCACATCTTGCGAATATATGTGTAGAA  
ACTGCCGGAAATCGTCGTGGTATTCCTCCAGAGCGATGAAAACGTTTCAGTTTGCTCATGG  
AAAACGGTGTAACAAGGGTGAACACTATCCCATATCACCAGCTCACCGTCTTTCATTGCCAT  
ACGGAACCTCCGGATGAGCATTTCATCAGGCGGGCAAGAATGTGAATAAAGGCCGGATAAAAC  
TTGTGCTTATTTTTCTTTACGGTCTTTAAAAAGGCCGTAATATCCAGCTGAACGGTCTGGTTAT  
AGGTACATTGAGCAACTGACTGAAATGCCTCAAATGTTCTTTACGATGCCATTGGGATATA  
TCAACGGTGGTATATCCAGTGATTTTTTTCTCCATTTTAGCTTCCTTAGCTCCTGAAAATCTCG  
ATAACTCAAAAATACGCCCGGTAGTGATCTTATTTTATTATGGTGAAAGTTGGAACCTCTTA  
CGTGCCGATCAACGTCTCATTTTTCGCCAAAAGTTGGCCCAGGGCTTCCCGGTATCAACAGGG  
ACACCAGGATTTATTTATTCTGCGAAGTGATCTTCCGTCACAGGTATTTATTCGGCGCAAAGT  
GCGTCGGGTGATGCTGCCAACTTACTGATTTAGTGTATGATGGTGTTTTTGAGGTGCTCCAGT  
GGCTTCTGTTTCTATCAGCTGTCCCTCCTGTTTACGCTACTGACGGGGTGGTGCCTAACGGCAA  
AAGCACCGCCGGACATCAGCGCTAGCGGAGTGATACTGGCTTACTATGTTGGCACTGATGA  
GGGTGTCAGTGAAGTGCTTCATGTGGCAGGAGAAAAAGGCTGCACCGGTGCGTCAGCAGA  
ATATGTGATACAGGATATATTCCGCTTCTCGCTCACTGACTCGCTACGCTCGGTCGTTTCGAC  
TGCGGCGAGCGGAAATGGCTTACGAACGGGGCGGAGATTTCTGGAAGATGCCAGGAAGAT  
ACTTAACAGGGAAGTGAGAGGGCCGCGGCAAAGCCGTTTTTCCATAGGCTCCGCCCCCTGA  
CAAGCATCACGAAATCTGACGCTCAAATCAGTGGTGGCGAAACCCGACAGGACTATAAAGA  
TACCAGGCGTTTCCCCTGGCGGCTCCCTCGTGCGCTCTCCTGTTTCTGCTTTTCGGTTTACCGG  
TGTCATTCCGCTGTTATGGCCGCGTTTGTCTCATTCCACGCCTGACACTCAGTTCCGGGTAGG  
CAGTTCGCTCCAAGCTGGACTGTATGCACGAACCCCCGTTTACGTCACGACCGCTGCGCCTTAT  
CCGGTAACTATCGTCTTGAGTCCAACCCGGAAAGACATGCAAAAAGCACCACTGGCAGCAGCC  
ACTGGTAATTGATTTAGAGGAGTTAGTCTTGAAGTCATGCGCCGGTTAAGGCTAAACTGAAA  
GGACAAGTTTTGGTGACTGCGCTCCTCAAAGCCAGTTACCTCGGTTCAAAGAGTTGGTAGCTC  
AGAGAACCTTCGAAAAACCGCCCTGCAAGGCGGTTTTTTTCGTTTTTCAGAGCAAGAGATTACG  
CGCAGACCAAAAACGATCTCAAGAAGATCATCTTATTAATCAGATAAAAATATTTCTAGATTTCT  
AGTGCAATTTATCTCTTCAAATGTAGCACCTGAAGTCAGCCCCATACGATATAAGTTGTAATT  
CTCATGTTAGTCATGCCCCGCGCCCACCGGAAGGAGCTGACTGGGTTGAAGGCTCTCAAGGG

CATCGGTCGAGATCCCGGTGCCTAATGAGTGAGCTAACTTACATTAATTGCGTTGCGCTCACT  
GCCCGCTTTCCAGTCGGGAAACCTGTCGTGCCAGCTGCATTAATGAATCGGCCAACGCGCGG  
GGAGAGGCGGTTTTGCGTATTGGGCGCCAGGGTGGTTTTTCTTTTCACCAGTGAGACGGGCAA  
CAGCTGATTGCCCTTACCCGCCTGGCCCTGAGAGAGTTGCAGCAAGCGGTCCACGCTGGTTT  
GCCCCAGCAGGCGAAAATCCTGTTTGATGGTGGTTAACGGCGGGATATAACATGAGCTGTCT  
TCGGTATCGTCGTATCCACTACCGAGATGTCCGCACCAACGCGCAGCCCGGACTCGGTAAT  
GGCGCGCATTGCGCCCAGCGCCATCTGATCGTTGGCAACCAGCATCGCAGTGGGAACGATGC  
CCTCATTCAGCATTGTCATGGTTTGTGAAAACCGGACATGGCACTCCAGTCGCCTTCCCGTT  
CCGCTATCGGCTGAATTTGATTGCGAGTGAGATATTTATGCCAGCCAGCCAGACGCAGACGC  
GCCGAGACAGAACTTAATGGGCCCCTAACAGCGCGATTTGCTGGTGACCCAATGCGACCAG  
ATGCTCCACGCCAGTCGCGTACCGTCTTCATGGGAGAAAATAATACTGTTGATGGGTGTCT  
GGTCAGAGACATCAAGAAATAACGCCGGAACATTAGTGCAGGCAGCTTCCACAGCAATGGC  
ATCCTGGTCATCCAGCGGATAGTTAATGATCAGCCCCTGACGCGTTGCGCGAGAAGATTGT  
GCACCGCCGCTTTACAGGCTTCGACGCCGCTTCGTTCTACCATCGACACCACCACGCTGGCAC  
CCAGTTGATCGGCGCGAGATTTAATCGCCGCGACAATTTGCGACGGCGCGTGCAGGGCCAGA  
CTGGAGGTGGCAACGCCAATCAGCAACGACTGTTTGCCCGCCAGTTGTTGTGCCACGCGGTT  
GGGAATGTAATTCAGCTCCGCCATCGCCGCTTCCACTTTTTCCCGCGTTTTTCGCAGAAACGTG  
GCTGGCCTGGTTCACCACGCGGGAAACGGTCTGATAAGAGACACCGGCATACTCTGCGACAT  
CGTATAACGTTACTGGTTTACATTCACCACCCTGAATTGACTCTCTTCCGGGCGCTATCATG  
CCATACCGCGAAAGTTTTGCGCCATTCGATGGTGTCCGGGATCTCGACGCTCTCCCTTATGC  
GACTCCTGCATTAGGAAATTAATACGACTCACTATA



1. **pDuet::IbpB**

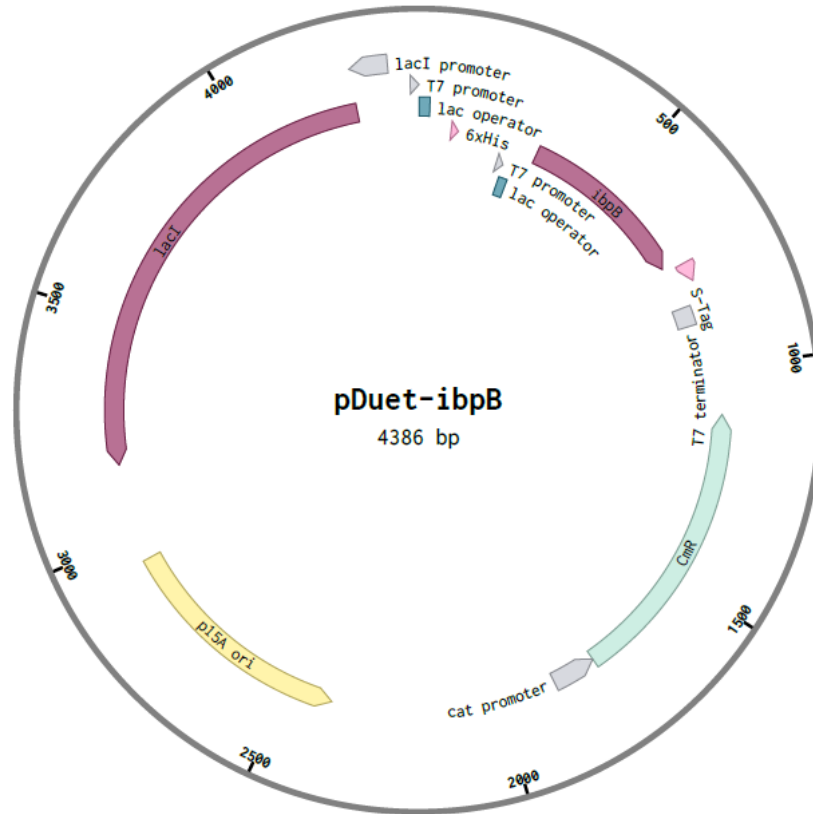

GGGGAATTGTGAGCGGATAACAATTCCTGTAGAAATAATTTTGTTTAACTTTAATAAGGA  
 GATATACCATGGGCAGCAGCCATCACCATCATCACCACAGCCAGGATCCGAATTCGAGCTCG  
 GCGCGCCTGCAGGTCGACAAGCTTGCGGCCGATAATGCTTAAGTCGAACAGAAAGTAATCG  
 TATTGTACACGGCCGATAATCGAAATTAATACGACTCACTATAGGGGAATTGTGAGCGGAT  
 AACAAATCCCCATCTTAGTATATTAGTTAAGTATAAGAAGGAGATATACATATGATGCGTAA  
 CTTCGATTTATCCCCACTGATGCGTCAATGGATCGGTTTTGACAAACTGGCCAACGCACTGCA  
 AAACGCCGGTGAAAGCCAGAGCTTCCCGCCGTACAACATTGAGAAAAGCGACGATAACCAC  
 TACCGCATTACCCTTGCGCTGGCAGGTTCCGTCAGGAAGATTTAGAGATTCAACTGGAAGG  
 TACGCGCCTGAGCGTAAAAGGCACGCCGAGCAGCCAAAAGAAGAGAAAAAATGGCTGCAT  
 CAAGGGCTTATGAATCAGCCATTTAGCCTGAGCTTTACGCTGGCTGAAAATATGGAAGTCTC  
 TGGCGCAACCTTCGTAAACGGTTTACTGCATATTGATTTAATTCGTAATGAGCCTGAACCCAT  
 CGCAGCGCAGCGTATCGCTATCAGCGAACGTCCCGCGTTAAATAGCTAACTCGAGTCTGGTA  
 AAGAAACCGCTGCTGCGAAATTTGAACGCCAGCACATGGACTCGTCTACTAGCGCAGCTTAA  
 TTAACCTAGGCTGCTGCCACCGCTGAGCAATAACTAGCATAACCCCTTGGGGCCTCTAAACG  
 GGTCTTGAGGGGTTTTTTGCTGAAACCTCAGGCATTTGAGAAGCACACGGTCACACTGCTTCC  
 GGTAGTCAATAAACCGGTAAACCAGCAATAGACATAAGCGGCTATTTAACGACCCTGCCCTG

AACCGACGACCGGGTTCGAATTTGCTTTCGAATTTCTGCCATTCATCCGCTTATTATCACTTATT  
CAGGCGTAGCACCAGGCGTTTAAGGGCACCAATAACTGCCTTAAAAAATTACGCCCCGCC  
TGCCACTCATCGCAGTACTGTTGTAATTCATTAAGCATTCTGCCGACATGGAAGCCATCACAG  
ACGGCATGATGAACCTGAATCGCCAGCGGCATCAGCACCTTGTCGCCTTGCGTATAATATTT  
GCCCATAGTGAAAACGGGGGCGAAGAAGTTGTCCATATTGGCCACGTTTAAATCAAACTGG  
TGAAACTCACCCAGGGATTGGCTGAGACGAAAAACATATTCTCAATAAACCTTTAGGGAAA  
TAGGCCAGGTTTTACCGTAACACGCCACATCTTGCGAATATATGTGTAGAACTGCCGGAA  
ATCGTCGTGGTATTCACTCCAGAGCGATGAAAACGTTTCAGTTTGCTCATGGAAAACGGTGT  
AACAAAGGGTGAACACTATCCCATATCACCAGCTCACCGTCTTTCATTGCCATACGGAACTCC  
GGATGAGCATTTCATCAGGCGGGCAAGAATGTGAATAAAGGCCGGATAAACTTGTGCTTATT  
TTTCTTTACGGTCTTTAAAAAGGCCGTAATATCCAGCTGAACGGTCTGGTTATAGGTACATTG  
AGCAACTGACTGAAATGCCTCAAATGTTCTTTACGATGCCATTGGGATATATCAACGGTGG  
TATATCCAGTGATTTTTTTCTCCATTTTAGCTTCCCTAGCTCCTGAAAATCTCGATAACTCAA  
AAATACGCCCGGTAGTGATCTTATTTTATTATGGTGAAAGTTGGAACCTCTTACGTGCCGATC  
AACGTCTCATTTTCGCCAAAAGTTGGCCAGGGCTTCCCGGTATCAACAGGGACACCAGGAT  
TTATTTATTCTGCGAAGTGATCTTCCGTCACAGGTATTTATTCGGCGCAAAGTGCGTCGGGTG  
ATGCTGCCAACTTACTGATTTAGTGTATGATGGTGTTTTTGAGGTGCTCCAGTGGCTTCTGTTT  
CTATCAGCTGTCCCTCCTGTTTACGCTACTGACGGGGTGGTGCCTAACGGCAAAGCACCGCC  
GGACATCAGCGCTAGCGGAGTGTATACTGGCTTACTATGTTGGCACTGATGAGGGTGTGAGT  
GAAGTGCTTCATGTGGCAGGAGAAAAAGGCTGCACCGGTGCGTCAGCAGAATATGTGATA  
CAGGATATATTCCGCTTCCCTCGCTCACTGACTCGCTACGCTCGGTGCTTCGACTGCGGGCAGC  
GGAAATGGCTTACGAACGGGGCGGAGATTTCTGGAAGATGCCAGGAAGATACTTAAACAGG  
GAAGTGAGAGGGCCGCGGCAAAGCCGTTTTTCCATAGGCTCCGCCCCCTGACAAGCATCAC  
GAAATCTGACGCTCAAATCAGTGGTGGCGAAACCCGACAGGACTATAAAGATACCAGGCGT  
TTCCCCTGGCGGCTCCCTCGTGCGCTCTCCTGTTTCTGCTTTCGGTTTACCGGTGTCATTCCG  
CTGTTATGGCCGCGTTTGTCTCATTCCACGCCTGACACTCAGTTCCGGGTAGGCAGTTCGCTC  
CAAGCTGGACTGTATGCACGAACCCCCGTTTACGTCAGTCCGACCGCTGCGCCTTATCCGGTAACT  
ATCGTCTTGAGTCCAACCCGGAAAGACATGCAAAAGCACCACTGGCAGCAGCCACTGGTAAT  
TGATTTAGAGGAGTTAGTCTTGAAGTCATGCGCCGGTTAAGGCTAAACTGAAAGGACAAGTT  
TTGGTGACTGCGCTCCTCCAAGCCAGTTACCTCGGTTCAAAGAGTTGGTAGCTCAGAGAACC  
TTCGAAAAACCGCCCTGCAAGGCGGTTTTTTTCGTTTTTCAGAGCAAGAGATTACGCGCAGACC  
AAAACGATCTCAAGAAGATCATCTTATTAATCAGATAAAAATATTTCTAGATTTTCAAGTGAATT  
TATCTCTTCAAATGTAGCACCTGAAGTCAGCCCCATACGATATAAGTTGTAATTCTCATGTTA  
GTCATGCCCCGCGCCACCGGAAGGAGCTGACTGGGTTGAAGGCTCTCAAGGGCATCGGTGCG

AGATCCCGGTGCCTAATGAGTGAGCTAACTTACATTAATTGCGTTGCGCTCACTGCCCGCTTT  
CCAGTCGGGAAACCTGTTCGTGCCAGCTGCATTAATGAATCGGCCAACGCGCGGGGAGAGGC  
GGTTTTCGTATTGGGCGCCAGGGTGGTTTTTCTTTTACCAGTGAGACGGGCAACAGCTGATT  
GCCCTTACCGCCTGGCCCTGAGAGAGTTGCAGCAAGCGGTCCACGCTGGTTTTGCCCCAGCA  
GGCGAAAATCCTGTTTGATGGTGGTTAACGGCGGGATATAACATGAGCTGTCTTCGGTATCG  
TCGTATCCCACTACCGAGATGTCCGCACCAACGCGCAGCCCCGGACTCGGTAATGGCGCGCAT  
TGCGCCCAGCGCCATCTGATCGTTGGCAACCAGCATCGCAGTGGGAACGATGCCCTCATTCA  
GCATTTGCATGGTTTGTGAAAACCGGACATGGCACTCCAGTCGCCTTCCCGTTCCGCTATCG  
GCTGAATTTGATTGCGAGTGAGATATTTATGCCAGCCAGCCAGACGCAGACGCGCCGAGACA  
GAACTTAATGGGCCCCTAACAGCGCGATTTGCTGGTGACCCAATGCGACCAGATGCTCCAC  
GCCAGTCGCGTACCGTCTTCATGGGAGAAAATAATACTGTTGATGGGTGTCTGGTCAGAGA  
CATCAAGAAATAACGCCGGAACATTAGTGCAGGCAGCTTCCACAGCAATGGCATCCTGGTCA  
TCCAGCGGATAGTTAATGATCAGCCCACTGACGCGTTGCGCGAGAAGATTGTGCACCGCCGC  
TTTACAGGCTTCGACGCCGCTTCGTTCTACCATCGACACCACCAGCTGGCACCCAGTTGATC  
GGCGCGAGATTTAATCGCCGCGACAATTTGCGACGGCGCGTGCAGGGCCAGACTGGAGGTG  
GCAACGCCAATCAGCAACGACTGTTTGCCCGCCAGTTGTTGTGCCACGCGGTTGGGAATGTA  
ATTCAGCTCCGCCATCGCCGCTTCCACTTTTTCCCGCGTTTTTCGCAGAAACGTGGCTGGCCTG  
GTTACCACGCGGGAAACGGTCTGATAAGAGACACCGGCATACTCTGCGACATCGTATAACG  
TACTGGTTTCACATTCACCACCCTGAATTGACTCTCTTCCGGGCGCTATCATGCCATAACGC  
GAAAGGTTTTGCGCCATTCGATGGTGTCCGGATCTCGACGCTCTCCCTTATGCGACTCCTGC  
ATTAGGAAATTAATACGACTCACTATA

m. pDuet::IbpAB

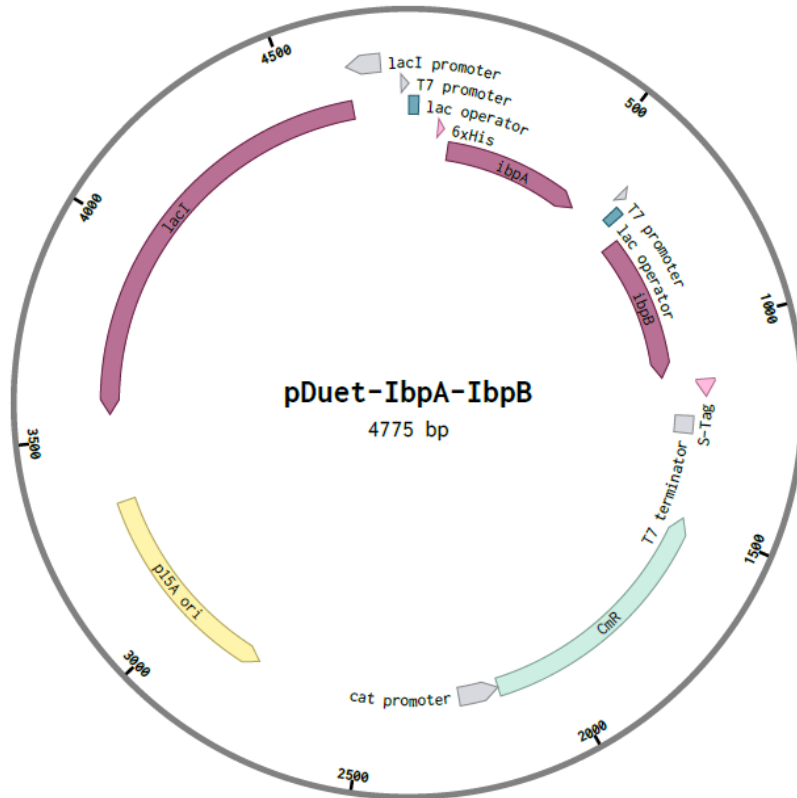

GGGGAATTGTGAGCGGATAACAATCCCCCTGTAGAAATAATTTTGTTTAACTTTAATAAGGA  
GATATACCATGGGCAGCAGCCATCACCATCATCACCACAGCCAGGATCCGAATTCATGCGTA  
ACTTTGATTTATCCCCGCTTTACCGTTCTGCTATTGGATTTGACCGTTTGTTTAACCCTTAGA  
AAACAACCAGAGCCAGAGTAATGGCGGCTACCCTCCGTATAACGTTGAACTGGTAGACGAA  
AACCATTACCGCATTGCTATCGCTGTGGCTGGTTTTGCTGAGAGCGAACTGGAAATTACCGCC  
CAGGATAATCTGCTGGTGGTGAAAGGTGCTCACGCCGACGAACAAAAAGAGCGCACCTATCT  
GTACCAGGGCATCGCTGAACGCAACTTTGAACGCAAATTCAGTTAGCTGAGAACATTCATG  
TTCGTGGTGCTAACCTGGTAAATGGTTTGCTGTATATCGATCTCGAACGCGTGATTCCGGAAG  
CGAAAAAACCGCGCCGTATCGAAATCAACTAAAAGCTTGCGGCCGCATAATGCTTAAGTCGA  
ACAGAAAGTAATCGTATTGTACACGGCCGCATAATCGAAATTAATACGACTCACTATAGGGG  
AATTGTGAGCGGATAACAATCCCCATCTTAGTATATTAGTTAAGTATAAGAAGGAGATATA  
CATATGATGCGTAACTTCGATTTATCCCCACTGATGCGTCAATGGATCGGTTTTGACAACTG  
GCCAACGCACTGCAAACGCCGGTGAAAGCCAGAGCTTCCC GCCGTACAACATTGAGAAAA  
GCGACGATAACCACTACCGCATTACCCTTGCGCTGGCAGGTTCCGTCAGGAAGATTTAGAG  
ATTCAACTGGAAGGTACGCGCCTGAGCGTAAAAGGCACGCCGGAGCAGCCAAAAGAAGAGA  
AAAAATGGCTGCATCAAGGGCTTATGAATCAGCCATTTAGCCTGAGCTTTACGCTGGCTGAA

AATATGGAAGTCTCTGGCGCAACCTTCGTAAACGGTTTACTGCATATTGATTTAATTCGTAAT  
GAGCCTGAACCCATCGCAGCGCAGCGTATCGCTATCAGCGAACGTCCCGCGTTAAATAGCTA  
ACTCGAGTCTGGTAAAGAAACCGCTGCTGCGAAATTTGAACGCCAGCACATGGACTCGTCTA  
CTAGCGCAGCTTAATTAACCTAGGCTGCTGCCACCGCTGAGCAATAACTAGCATAACCCCTT  
GGGGCCTCTAAACGGGTCTTGAGGGGTTTTTTGCTGAAACCTCAGGCATTTGAGAAGCACAC  
GGTCACACTGCTTCCGGTAGTCAATAAACCGGTAAACCAGCAATAGACATAAGCGGCTATTT  
AACGACCCTGCCCTGAACCGACGACCGGGTCGAATTTGCTTTTGAATTTCTGCCATTCATCCG  
CTTATTATCACTTATTCAGGCGTAGCACCAGGCGTTTAAGGGCACCAATAACTGCCTTAAAA  
AAATTACGCCCCGCCCTGCCACTCATCGCAGTACTGTTGTAATTCATTAAGCATTCTGCCGAC  
ATGGAAGCCATCACAGACGGCATGATGAACCTGAATCGCCAGCGGCATCAGCACCTTGTCGC  
CTTGCGTATAATATTTGCCCATAGTGAAAACGGGGGCGAAGAAGTTGTCCATATTGGCCACG  
TTTAAATCAAACCTGGTGAAACTACCCAGGGATTGGCTGAGACGAAAAACATATTCTCAAT  
AAACCCTTTAGGGAAATAGGCCAGGTTTTTACCCTAACACGCCACATCTTGCGAATATATGT  
GTAGAAACTGCCGAAATCGTCGTGGTATTCACTCCAGAGCGATGAAAACGTTTCAGTTTGC  
TCATGGAAAACGGTGTAACAAGGGTGAACACTATCCCATATCACCAGCTCACCGTCTTTCAT  
TGCCATACGGAACCTCCGGATGAGCATTATCAGGCGGGCAAGAATGTGAATAAAGGCCGGA  
TAAAACCTTGTGCTTATTTTTCTTTACGGTCTTTAAAAAGGCCGTAATATCCAGCTGAACGGTC  
TGGTTATAGGTACATTGAGCAACTGACTGAAATGCCTCAAATGTTCTTTACGATGCCATTGG  
GATATATCAACGGTGGTATATCCAGTGATTTTTTTCTCCATTTTAGCTTCCTTAGCTCCTGAAA  
ATCTCGATAACTCAAAAAATACGCCCGGTAGTGATCTTATTTTATTATGGTGAAAGTTGGAA  
CCTCTTACGTGCCGATCAACGTCTCATTTTTCGCCAAAAGTTGGCCCAGGGCTTCCCGGTATCA  
ACAGGGACACCAGGATTTATTTATTCTGCGAAGTGATCTTCCGTCACAGGTATTTATTCGGCG  
CAAAGTGCGTCGGGTGATGCTGCCAACTTACTGATTTAGTGTATGATGGTGTTTTTGAGGTGC  
TCCAGTGGCTTCTGTTTCTATCAGCTGTCCCTCCTGTTACGCTACTGACGGGGTGGTGCGTAA  
CGGCAAAGCACCGCCGACATCAGCGCTAGCGGAGTGTATACTGGCTTACTATGTTGGCAC  
TGATGAGGGTGTGAGTGAAGTGCTTCATGTGGCAGGAGAAAAAGGCTGCACCGGTGCGTC  
AGCAGAATATGTGATACAGGATATATTCGCTTCCCTCGCTCACTGACTCGCTACGCTCGGTGC  
TTCGACTGCGGCGAGCGGAAATGGCTTACGAACGGGGCGGAGATTTCTGGAAGATGCCAG  
GAAGATACTTAACAGGGAAGTGAGAGGGGCCGCGGCAAAGCCGTTTTTCCATAGGCTCCGCCC  
CCCTGACAAGCATCACGAAATCTGACGCTCAAATCAGTGGTGGCGAAACCCGACAGGACTAT  
AAAGATAACCAGGCGTTTTCCCTGGCGGCTCCCTCGTGCGCTCTCCTGTTCTGCCTTTCCGTTT  
ACCGGTGTCATTCCGCTGTTATGGCCCGTTTTGTCTCATTCACGCCTGACACTCAGTTCCGG  
GTAGGCAGTTCGCTCCAAGCTGGACTGTATGCACGAACCCCCGTTTCAGTCCGACCGCTGCG  
CCTTATCCGGTAACTATCGTCTTGAGTCCAACCCGGAAAGACATGCAAAAAGCACCACTGGCA

GCAGCCACTGGTAATTGATTTAGAGGAGTTAGTCTTGAAGTCATGCGCCGGTTAAGGCTAAA  
CTGAAAGGACAAGTTTTGGTGACTGCGCTCCTCCAAGCCAGTTACCTCGGTTCAAAGAGTTG  
GTAGCTCAGAGAACCTTCGAAAAACCGCCCTGCAAGGCGGTTTTTTTCGTTTTTCAGAGCAAGA  
GATTACGCGCAGACCAAAACGATCTCAAGAAGATCATCTTATTAATCAGATAAAAATATTTCT  
AGATTTTCAGTGCAATTTATCTCTTCAAATGTAGCACCTGAAGTCAGCCCCATACGATATAAGT  
TGTAATTCTCATGTTAGTCATGCCCCGCGCCACCGGAAGGAGCTGACTGGGTTGAAGGCTC  
TCAAGGGCATCGGTCGAGATCCCGGTGCCTAATGAGTGAGCTAACTTACATTAATTGCGTTG  
CGCTCACTGCCCCGTTTTCCAGTCGGGAAACCTGTCGTGCCAGCTGCATTAATGAATCGGCCA  
ACGCGCGGGGAGAGGGCGGTTTTGCGTATTGGGCGCCAGGGTGGTTTTTTCTTTTCACCAGTGAG  
ACGGGCAACAGCTGATTGCCCTTACCAGCCTGGCCCTGAGAGAGTTGCAGCAAGCGGTCCAC  
GCTGGTTTGCCCCAGCAGGCGAAAATCCTGTTTGATGGTGGTTAACGGCGGGATATAACATG  
AGCTGTCTTCGGTATCGTCGTATCCACTACCGAGATGTCCGCACCAACGCGCAGCCCGGAC  
TCGGTAATGGCGCGCATTGCGCCAGCGCCATCTGATCGTTGGCAACCAGCATCGCAGTGGG  
AACGATGCCCTCATTACGATTTGCATGGTTTTGTTGAAAACCGGACATGGCACTCCAGTCGCC  
TTCCCGTTCCGCTATCGGCTGAATTTGATTGCGAGTGAGATATTTATGCCAGCCAGCCAGACG  
CAGACGCGCCGAGACAGAACTTAATGGGCCCGCTAACAGCGCGATTTGCTGGTGACCCAATG  
CGACCAGATGCTCCACGCCAGTCGCGTACCGTCTTCATGGGAGAAAATAATACTGTTGATG  
GGTGTCTGGTCAGAGACATCAAGAAATAACGCCGGAACATTAGTGCAGGCAGCTTCCACAGC  
AATGGCATCCTGGTCATCCAGCGGATAGTTAATGATCAGCCCACTGACGCGTTGCGCGAGAA  
GATTGTGCACCGCCGCTTTACAGGCTTCGACGCCGCTTCGTTCTACCATCGACACCACCACGC  
TGGCACCCAGTTGATCGGCGCGAGATTTAATCGCCGCGACAATTTGCGACGGCGCGTGCAGG  
GCCAGACTGGAGGTGGCAACGCCAATCAGCAACGACTGTTTGCCCGCCAGTTGTTGTGCCAC  
GCGGTTGGGAATGTAATTCAGCTCCGCCATCGCCGCTTCCACTTTTTCCCGCGTTTTTCGCAGA  
AACGTGGCTGGCCTGGTTCACCACGCGGGAAACGGTCTGATAAGAGACACCGGCATACTCTG  
CGACATCGTATAACGTTACTGGTTTCACATTCACCACCCTGAATTGACTCTCTTCCGGGCGCT  
ATCATGCCATACCGCGAAAGGTTTTGCGCCATTCGATGGTGTCCGGGATCTCGACGCTCTCCC  
TTATGCGACTCCTGCATTAGGAAATTAATACGACTCACTATA

n. pDuet::DsbA

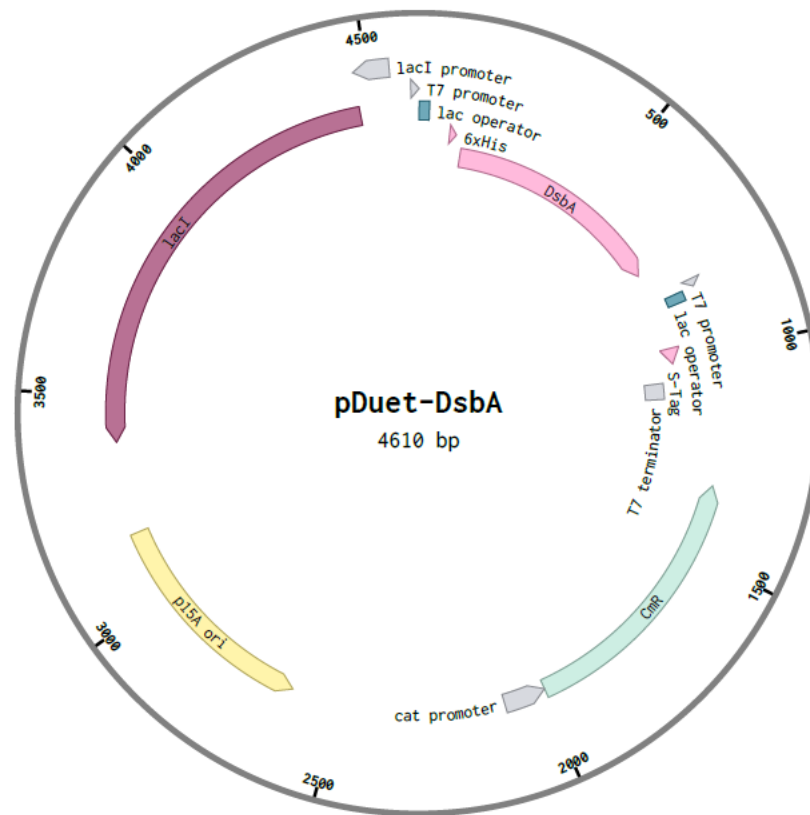

GGGGAATTGTGAGCGGATAACAATCCCCTGTAGAAATAATTTTGTTTAACTTTAATAAGGA  
 GATATACCATGGGCAGCAGCCATCACCATCATCACCACAGCCAGGATCCGAATTCATGAAAA  
 AGATTTGGCTGGCGCTGGCTGGTTTAGTTTTAGCGTTTAGCGCATCGGCGGCGCAGTATGAA  
 GATGGTAAACAGTACACTACCCTGGAAAAACCGGTAGCTGGCGCGCCGCAAGTGCTGGAGTT  
 TTTCTCTTCTTCTGCCCCGACTGCTATCAGTTTGAAGAAGTTCTGCATATTTCTGATAATGTG  
 AAGAAAAAACTGCCGAAGGCGTGAAGATGACTAAATACCACGTCAACTTCATGGGTGGTG  
 ACCTGGGCAAAGATCTGACTCAGGCATGGGCTGTGGCGATGGCGCTGGGCGTGGAAGACAA  
 AGTGAAGTTCGCTGTTTGAAGGCGTACAGAAAACCCAGACCATTCGTTCTGCTTCTGATAT  
 CCGCGATGTATTTATCAACGCAGGTATTAAGGTGAAGAGTACGACGCGGCGTGGAACAGCT  
 TCGTGGTCAAATCTCTGGTCGCTCAGCAGGAAAAAGCTGCAGCTGACGTGCAATTGCGTGGC  
 GTTCCGGCGATGTTTGTAAACGGTAAATATCAGCTGAATCCGCAGGGTATGGATAACCAGCAA  
 TATGGATGTTTTTGTTCAGCAGTATGCTGATACAGTGAAATATCTGTCCGAGAAAAAATAAA  
 AGCTTGCAGCCGATAATGCTTAAGTCGAACAGAAAGTAATCGTATTGTACACGGCCGATA  
 ATCGAAATTAATACGACTCACTATAGGGGAATTGTGAGCGGATAACAATCCCATCTTAGT  
 ATATTAGTTAAGTATAAGAAGGAGATATACATATGGCAGATCTCAATTGGATATCGGCCGGC  
 CACGCGATCGCTGACGTGCGTACCCTCGAGTCTGGTAAAGAAACCGCTGCTGCGAAATTTGA

ACGCCAGCACATGGACTCGTCTACTAGCGCAGCTTAATTAACCTAGGCTGCTGCCACCGCTG  
AGCAATAACTAGCATAACCCCTTGGGGCCTCTAACGGGTCTTGAGGGGTTTTTTGCTGAAA  
CCTCAGGCATTTGAGAAGCACACGGTCACACTGCTTCCGGTAGTCAATAAACCGGTAAACCA  
GCAATAGACATAAGCGGCTATTTAACGACCCTGCCCTGAACCGACGACCGGGTCAATTTGC  
TTTCGAATTTCTGCCATTCATCCGCTTATTATCACTTATTCAGGCGTAGCACCAGGCGTTTAA  
GGGCACCAATAACTGCCTTAAAAAATTACGCCCCGCCCTGCCACTCATCGCAGTACTGTTG  
TAATTCATTAAGCATTCTGCCGACATGGAAGCCATCACAGACGGCATGATGAACCTGAATCG  
CCAGCGGCATCAGCACCTTGTGCGCTTGCCTATAATATTTGCCCATAGTGAAAACGGGGGCG  
AAGAAGTTGTCCATATTGGCCACGTTTAAATCAAACTGGTGAAACTCACCCAGGGATTGGC  
TGAGACGAAAAACATATTCTCAATAAACCCCTTTAGGGAAATAGGCCAGGTTTTTCACCGTAAC  
ACGCCACATCTTGCGAATATATGTGTAGAACTGCCGGAAATCGTCGTGGTATTCACTCCAG  
AGCGATGAAAACGTTTCAGTTTGCTCATGGAAAACGGGTGAACAAGGGTGAACACTATCCCA  
TATCACCAGCTCACCGTCTTTCATTGCCATACGGAACCTCCGGATGAGCATTATCAGGCGGGC  
AAGAATGTGAATAAAGGCCGGATAAACTTGTGCTTATTTTTCTTTACGGTCTTTAAAAAGGC  
CGTAATATCCAGCTGAACGGTCTGGTTATAGGTACATTGAGCAACTGACTGAAATGCCTCAA  
AATGTTCTTTACGATGCCATTGGGATATATCAACGGTGGTATATCCAGTGATTTTTTTCTCCAT  
TTTAGCTTCCTTAGCTCCTGAAAATCTCGATAACTCAAAAATACGCCCCGGTAGTGATCTTAT  
TTCATTATGGTGAAAGTTGGAACCTCTTACGTGCCGATCAACGTCTCATTTTCGCCAAAAGTT  
GGCCCAGGGCTTCCCGGTATCAACAGGGACACCAGGATTTATTTATTCTGCGAAGTGATCTTC  
CGTCACAGGTATTTATTCGGCGCAAAGTGCGTCGGGTGATGCTGCCAACTTACTGATTTAGTG  
TATGATGGTGTTTTTGAGGTGCTCCAGTGGCTTCTGTTTCTATCAGCTGTCCCTCCTGTTCAGC  
TACTGACGGGGTGGTGCCTAACGGCAAAGCACCGCCGGACATCAGCGCTAGCGGAGTGTA  
TACTGGCTTACTATGTTGGCACTGATGAGGGTGTGAGTGAAGTGCTTCATGTGGCAGGAGAA  
AAAAGGCTGCACCGGTGCGTCAGCAGAATATGTGATACAGGATATATTCCGCTTCCTCGCTC  
ACTGACTCGCTACGCTCGGTGCTTCGACTGCGGCGAGCGGAAATGGCTTACGAACGGGGCGG  
AGATTTCCCTGGAAGATGCCAGGAAGATACTTAACAGGGAAGTGAGAGGGCCGCGGCAAAGC  
CGTTTTTCCATAGGCTCCGCCCCCTGACAAGCATCACGAAATCTGACGCTCAAATCAGTGGT  
GGCGAAACCCGACAGGACTATAAAGATACCAGGCGTTTCCCCTGGCGGCTCCCTCGTGCGCT  
CTCCTGTTCCCTGCCTTTTCGGTTTACCGGTGTCATTCCGCTGTTATGGCCGCGTTTGTCTCATT  
CACGCCTGACACTCAGTTCGGGTAGGCAGTTCGCTCCAAGCTGGACTGTATGCACGAACCC  
CCCGTTCAGTCCGACCGCTGCGCCTTATCCGGTAACTATCGTCTTGAGTCCAACCCGGAAAGA  
CATGCAAAAAGCACCACTGGCAGCAGCCACTGGTAATTGATTTAGAGGAGTTAGTCTTGAAGT  
CATGCGCCGGTTAAGGCTAACTGAAAGGACAAGTTTTGGTGACTGCGCTCCTCCAAGCCAG  
TTACCTCGGTTCAAAGAGTTGGTAGCTCAGAGAACCTTCGAAAAACCGCCCTGCAAGGCGGT



TTTTTCGTTTTTCAGAGCAAGAGATTACGCGCAGACCAAACGATCTCAAGAAGATCATCTTA  
TTAATCAGATAAAATATTTCTAGATTTTCAGTGCAATTTATCTCTTCAAATGTAGCACCTGAAG  
TCAGCCCCATACGATATAAGTTGTAATTCTCATGTTAGTCATGCCCCGCGCCACCGGAAGG  
AGCTGACTGGGTTGAAGGCTCTCAAGGGCATCGGTCGAGATCCCGGTGCCTAATGAGTGAGC  
TAACTTACATTAATTGCGTTGCGCTCACTGCCCCGCTTTCAGTCGGGAAACCTGTCGTGCCAG  
CTGCATTAATGAATCGGCCAACGCGCGGGGAGAGGGCGGTTTGCCTATTGGGCGCCAGGGTGG  
TTTTTCTTTTCACCAGTGAGACGGGCAACAGCTGATTGCCCTTACCGCCTGGCCCTGAGAGA  
GTTGCAGCAAGCGGTCCACGCTGGTTTGGCCAGCAGGCGAAAATCCTGTTTGATGGTGGTT  
AACGGCGGGATATAACATGAGCTGTCTTCGGTATCGTCGTATCCCACTACCGAGATGTCCGC  
ACCAACGCGCAGCCCCGGACTCGGTAATGGCGCGCATTGCGCCCAGCGCCATCTGATCGTTGG  
CAACCAGCATCGCAGTGGGAACGATGCCCTCATTACGATTTGCATGGTTTGTGAAAACCG  
GACATGGCACTCCAGTCGCCTTCCCGTTCGGCTATCGGCTGAATTTGATTGCGAGTGAGATAT  
TTATGCCAGCCAGCCAGACGCGAGACGCGCCGAGACAGAACTTAATGGGCCCCGCTAACAGCG  
CGATTTGCTGGTGACCCAATGCGACCAGATGCTCCACGCCAGTCGCGTACCGTCTTCATGG  
GAGAAAATAATACTGTTGATGGGTGTCTGGTCAGAGACATCAAGAAATAACGCCGGAACATT  
AGTGCAGGCAGCTTCCACAGCAATGGCATCCTGGTCATCCAGCGGATAGTTAATGATCAGCC  
CACTGACGCGTTGCGCGAGAAGATTGTGCACCGCCGCTTTACAGGCTTCGACGCCGCTTCGTT  
CTACCATCGACACCACCACGCTGGCACCCAGTTGATCGGCGCGAGATTTAATCGCCGCGACA  
ATTTGCGACGGCGCGTGCAGGGCCAGACTGGAGGTGGCAACGCCAATCAGCAACGACTGTTT  
GCCCGCCAGTTGTTGTGCCACGCGGTTGGGAATGTAATTCAGCTCCGCCATCGCCGCTTCCAC  
TTTTTCCCGCGTTTTTCGCAGAAACGTGGCTGGCCTGGTTCACCACGCGGGAAACGGTCTGATA  
AGAGACACCGGCATACTCTGCGACATCGTATAACGTTACTGGTTTACATTCACCACCCTGA  
ATTGACTCTCTTCCGGGCGCTATCATGCCATAACCGCGAAAGGTTTTGCGCCATTCGATGGTGT  
CCGGGATCTCGACGCTCTCCCTTATGCGACTCCTGCATTAGGAAATTAATACGACTCACTATA

o. pDuet::DsbB

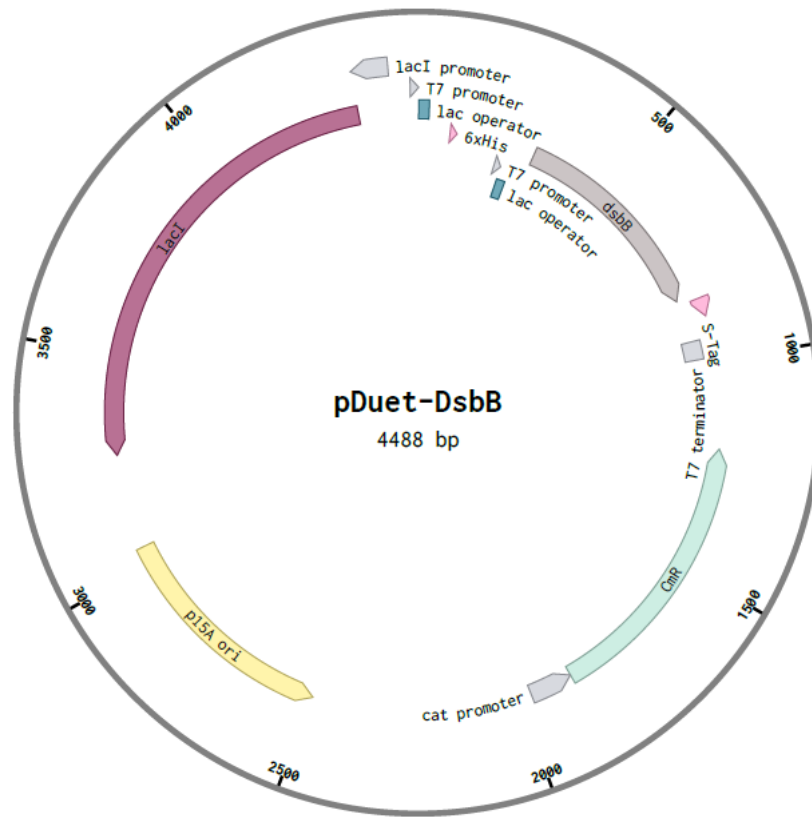

GGGGAATTGTGAGCGGATAACAATCCCCTGTAGAAATAATTTTGTTTAACTTTAATAAGGA  
GATATACCATGGGCAGCAGCCATCACCATCATCACCACAGCCAGGATCCGAATTCGAGCTCG  
GCGCGCCTGCAGGTCGACAAGCTTGCGGCCGCATAATGCTTAAGTCGAACAGAAAGTAATCG  
TATTGTACACGGCCGCATAATCGAAATTAATACGACTCACTATAGGGGAATTGTGAGCGGAT  
AACAAATCCCCATCTTAGTATATTAGTTAAGTATAAGAAGGAGATATACATATGATGTTGCG  
ATTTTTGAACCAATGTTCAAGGCCGGGGCGCGTGGCTGTTGATGGCGTTTACTGCTCTGGC  
ACTGGAAGTACGGCGCTGTGGTTCCAGCATGTGATGTTACTGAAACCTTGCCTGCTCTGTAT  
TTATGAACGCTGCGCGTTATTCGGCGTTCTGGGTGCTGCGCTGATTGGCGCGATCGCCCCGAA  
AACTCCGCTGCGTTATGTAGCGATGGTTATCTGGTTGTATAGTGCGTTCCGCGGTGTGCAGTT  
AACTTACGAGCACACCATGCTTCAGCTCTATCCTTCGCCGTTTGCCACCTGTGATTTTATGGTT  
CGTTTCCCGGAATGGCTGCCGCTGGATAAGTGGGTGCCGCAAGTGTTTGTGCGCCTCTGGCGAT  
TGCGCCGAGCGTCAGTGGGATTTTTTAGGTCTGGAAATGCCGCAGTGGCTGCTCGGTATTTTT  
ATCGCTTACCTGATTGTCGCAGTGCTGGTGGTGATTTCCAGCCGTTTAAAGCGAAAAACGT  
GATCTGTTTCGGTCGCTAACTCGAGTCTGGTAAAGAAACCGCTGCTGCGAAATTTGAACGCCA  
GCACATGGACTCGTCTACTAGCGCAGCTTAATTAACCTAGGCTGCTGCCACCGCTGAGCAAT  
AACTAGCATAACCCCTTGGGGCCTCTAAACGGGTCTTGAGGGGTTTTTTGCTGAAACCTCAG

GCATTTGAGAAGCACACGGTCACACTGCTTCCGGTAGTCAATAAACCGGTAAACCAGCAATA  
GACATAAGCGGCTATTTAACGACCCTGCCCTGAACCGACGACCGGGTTCGAATTTGCTTTCGA  
ATTTCTGCCATTCATCCGCTTATTATCACTTATTCAGGCGTAGCACCAGGCGTTTAAGGGCAC  
CAATAACTGCCTTAAAAAAATTACGCCCCGCCCTGCCACTCATCGCAGTACTGTTGTAATTCA  
TTAAGCATTCTGCCGACATGGAAGCCATCACAGACGGCATGATGAACCTGAATCGCCAGCGG  
CATCAGCACCTTGTGCGCTTGCCTATAATATTTGCCCATAGTGAAAACGGGGGCGAAGAAGT  
TGTCCATATTGGCCACGTTTAAATCAAACCTGGTGAAACTCACCCAGGGATTGGCTGAGACG  
AAAAACATATTCTCAATAAACCCTTTAGGGAAATAGGCCAGGTTTTACCCGTAACACGCCAC  
ATCTTGCGAATATATGTGTAGAACTGCCGGAAATCGTCGTGGTATTCACTCCAGAGCGATG  
AAAACGTTTCAGTTTGCTCATGGAAAACGGGTGTAACAAGGGTGAACACTATCCCATATCACC  
AGCTCACCGTCTTTCATTGCCATACGGAACCTCCGGATGAGCATTTCATCAGGCGGGCAAGAAT  
GTGAATAAAGGCCGGATAAAACTTGTGCTTATTTTTCTTTACGGTCTTAAAAAGGCCGTAAT  
ATCCAGCTGAACGGTCTGGTTATAGGTACATTGAGCAACTGACTGAAATGCCTCAAATGTT  
CTTTACGATGCCATTGGGATATATCAACGGTGGTATATCCAGTGATTTTTTTCTCCATTTTAGC  
TTCCTTAGCTCCTGAAAATCTCGATAACTCAAAAAATACGCCCGGTAGTGATCTTATTTTCATT  
ATGGTGAAAGTTGGAACCTCTTACGTGCCGATCAACGTCTCATTTTTCGCCAAAAGTTGGCCCA  
GGGCTTCCCGGTATCAACAGGGACACCAGGATTTATTTATTCTGCGAAGTGATCTTCCGTCAC  
AGGTATTTATTCGGCGCAAAGTGCGTCGGGTGATGCTGCCAACTTACTGATTTAGTGTATGAT  
GGTGTTTTTGAGGTGCTCCAGTGGCTTCTGTTTCTATCAGCTGTCCCTCCTGTTTCAGCTACTGA  
CGGGGTGGTGCCTAACGGCAAAGCACCGCCGGACATCAGCGCTAGCGGAGTGTATACTGG  
CTTACTATGTTGGCACTGATGAGGGTGTGAGTGAAGTGCTTCATGTGGCAGGAGAAAAAAGG  
CTGCACCGGTGCGTCAGCAGAATATGTGATACAGGATATATTCCGCTTCCCTCGCTCACTGACT  
CGCTACGCTCGGTGCTTCGACTGCGGGGAGCGGAAATGGCTTACGAACGGGGCGGAGATTTTC  
CTGGAAGATGCCAGGAAGATACTTAACAGGGAAGTGAGAGGGCCGCGGCAAAGCCGTTTTTT  
CCATAGGCTCCGCCCCCTGACAAGCATCACGAAATCTGACGCTCAAATCAGTGGTGGCGAA  
ACCCGACAGGACTATAAAGATACCAGGCGTTTTCCCCTGGCGGCTCCCTCGTGCGCTCTCCTGT  
TCCTGCCTTTCGGTTTACCGGTGTCATTCCGCTGTTATGGCCGCGTTTGTCTCATTCCACGCCT  
GACACTCAGTTCCGGGTAGGCAGTTCGCTCCAAGCTGGACTGTATGCACGAACCCCCCGTTC  
AGTCCGACCGCTGCGCCTTATCCGGTAACTATCGTCTTGAGTCCAACCCGAAAGACATGCA  
AAAGCACCCTGGCAGCAGCCACTGGTAATTGATTTAGAGGAGTTAGTCTTGAAGTCATGCG  
CCGTTAAGGCTAAACTGAAAGGACAAGTTTTGGTGACTGCGCTCCTCCAAGCCAGTTACCT  
CGGTTCAAAGAGTTGGTAGCTCAGAGAACCTTCGAAAAACCGCCCTGCAAGGCGGTTTTTTTC  
GTTTTCAGAGCAAGAGATTACGCGCAGACCAAAACGATCTCAAGAAGATCATCTTATTAATC  
AGATAAAATATTTCTAGATTTTCAGTGCAATTTATCTCTTCAAATGTAGCACCTGAAGTCAGCC

CCATACGATATAAGTTGTAATTCTCATGTTAGTCATGCCCCGCGCCCACCGGAAGGAGCTGA  
CTGGGTTGAAGGCTCTCAAGGGCATCGGTTCGAGATCCCGGTGCCTAATGAGTGAGCTAACTT  
ACATTAATTGCGTTGCGCTCACTGCCCGCTTTCCAGTCGGGAAACCTGTCGTGCCAGCTGCAT  
TAATGAATCGGCCAACGCGCGGGGAGAGGCGGTTTTGCGTATTGGGCGCCAGGGTGGTTTTTC  
TTTTACCAGTGAGACGGGCAACAGCTGATTGCCCTTACCGCCTGGCCCTGAGAGAGTTGC  
AGCAAGCGGTCCACGCTGGTTTGCCCCAGCAGGCGAAAATCCTGTTTGATGGTGGTTAACGG  
CGGGATATAACATGAGCTGTCTTCGGTATCGTCGTATCCCACTACCGAGATGTCCGCACCAA  
CGCGCAGCCCGGACTCGGTAATGGCGCGCATTGCGCCAGCGCCATCTGATCGTTGGCAACC  
AGCATCGCAGTGGGAACGATGCCCTCATTAGCATTGTCATGGTTTTGTTGAAAACCGGACAT  
GGCACTCCAGTCGCCCTTCCCGTTCCGCTATCGGCTGAATTTGATTGCGAGTGAGATATTTATG  
CCAGCCAGCCAGACGCAGACGCGCCGAGACAGAACTTAATGGGCCCCGCTAACAGCGCGATT  
TGCTGGTGACCCAATGCGACCAGATGCTCCACGCCAGTCGCGTACCGTCTTCATGGGAGAA  
AATAATACTGTTGATGGGTGTCTGGTCAGAGACATCAAGAAATAACGCCGGAACATTAGTGC  
AGGCAGCTTCCACAGCAATGGCATCCTGGTCATCCAGCGGATAGTTAATGATCAGCCCACTG  
ACGCGTTGCGCGAGAAGATTGTGCACCGCCGCTTTACAGGCTTCGACGCCGCTTCGTTCTACC  
ATCGACACCACCACGCTGGCACCCAGTTGATCGGCGCGAGATTTAATCGCCGCGACAATTTG  
CGACGGCGCGTGCAGGGCCAGACTGGAGGTGGCAACGCCAATCAGCAACGACTGTTTGCCC  
GCCAGTTGTTGTGCCACGCGGTTGGGAATGTAATTCAGCTCCGCCATCGCCGCTTCCACTTTT  
TCCCGCGTTTTTCGCAGAAACGTGGCTGGCCTGGTTCACCACGCGGGAAACGGTCTGATAAGA  
GACACCGGCATACTCTGCGACATCGTATAACGTTACTGGTTTCACATTCACCACCCTGAATTG  
ACTCTCTTCCGGGCGCTATCATGCCATAACCGCGAAAGGTTTTGCGCCATTCGATGGTGTCCGG  
GATCTCGACGCTCTCCCTTATGCGACTCCTGCATTAGGAAATTAATACGACTCACTATA

p. pDuet::DsbAB

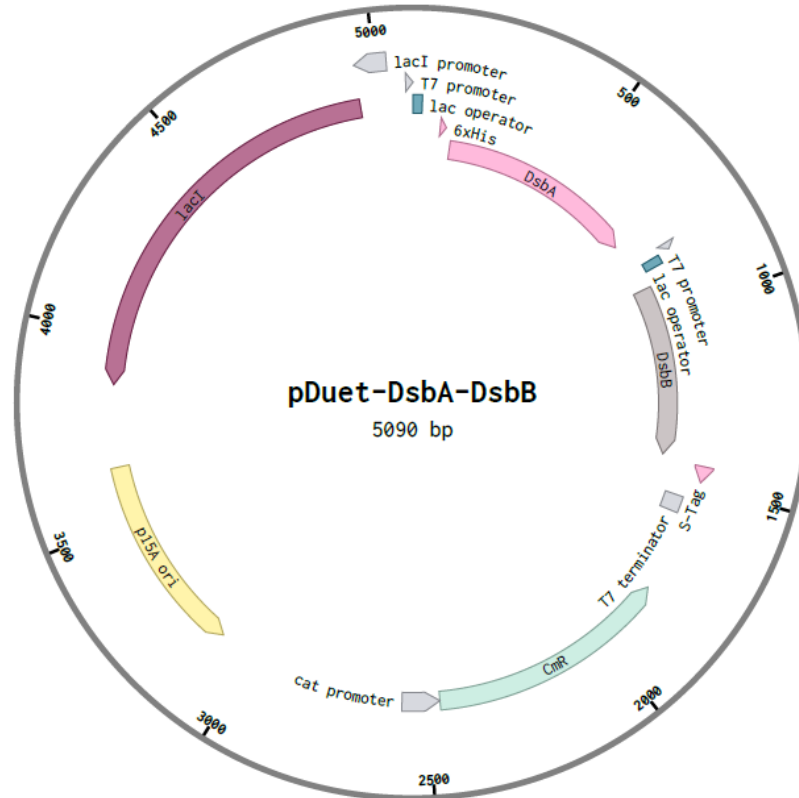

GGGGAATTGTGAGCGGATAACAATCCCCTGTAGAAATAATTTTGTTTAACTTTAATAAGGA  
GATATACCATGGGCAGCAGCCATCACCATCATCACCACAGCCAGGATCCGAATTCATGAAAA  
AGATTTGGCTGGCGCTGGCTGGTTTAGTTTTAGCGTTTAGCGCATCGGCGGCGCAGTATGAA  
GATGGTAAACAGTACACTACCCTGGAAAAACCGGTAGCTGGCGCGCCGCAAGTGCTGGAGTT  
TTTCTCTTTCTTCTGCCCCGACTGCTATCAGTTTGAAGAAGTTCTGCATATTTCTGATAATGTG  
AAGAAAAAACTGCCGGAAGGCGTGAAGATGACTAAATACCACGTCAACTTCATGGGTGGTG  
ACCTGGGCAAAGATCTGACTCAGGCATGGGCTGTGGCGATGGCGCTGGGCGTGGAAGACAA  
AGTGAAGTTCGCTGTTTGAAGGCGTACAGAAAACCCAGACCATTCGTTCTGCTTCTGATAT  
CCGCGATGTATTTATCAACGCAGGTATTAAGGTGAAGAGTACGACGCGGCGTGGAACAGCT  
TCGTGGTCAAATCTCTGGTCGCTCAGCAGGAAAAAGCTGCAGCTGACGTGCAATTGCGTGCC  
GTTCCGGCGATGTTTGTAAACGGTAAATATCAGCTGAATCCGCAGGGTATGGATAACCAGCAA  
TATGGATGTTTTTGTTCAGCAGTATGCTGATACAGTGAATATCTGTCCGAGAAAAAATAAA  
AGCTTGCGGCCGCATAATGCTTAAGTCGAACAGAAAGTAATCGTATTGTACACGGCCGCATA  
ATCGAAATTAATACGACTCACTATAGGGGAATTGTGAGCGGATAACAATCCCATCTTAGT  
ATATTAGTTAAGTATAAGAAGGAGATATACATATGATGTTGCGATTTTTGAACCAATGTTAC  
AAGGCCGGGGCGCGTGGCTGTTGATGGCGTTACTGCTCTGGCACTGGAAGTACGGCGCTG

TGGTTCAGCATGTGATGTTACTGAAACCTTGCGTGCTCTGTATTTATGAACGCTGCGCGTTA  
TTCGGCGTTCTGGGTGCTGCGCTGATTGGCGCGATCGCCCCGAAAACCTCCGCTGCGTTATGTA  
GCGATGGTTATCTGGTTGTATAGTGCGTTCGCGGGTGTGCAGTTAACTTACGAGCACACCATG  
CTTCAGCTCTATCCTTCGCCGTTTGCCACCTGTGATTTTATGGTTCGTTTCCCGGAATGGCTGC  
CGCTGGATAAGTGGGTGCCGCAAGTGTGTCGCCTCTGGCGATTGCGCCGAGCGTCAGTGG  
GATTTTTTAGGTCTGGAAATGCCGCAGTGGCTGCTCGGTATTTTTATCGCTTACCTGATTGTC  
GCAGTGCTGGTGGTGATTTCCAGCCGTTTAAAGCGAAAAACGTGATCTGTTCCGGTCGCTA  
ACTCGAGTCTGGTAAAGAAACCGCTGCTGCGAAATTTGAACGCCAGCACATGGACTCGTCTA  
CTAGCGCAGCTTAATTAACCTAGGCTGCTGCCACCGCTGAGCAATAACTAGCATAACCCCTT  
GGGGCCTCTAAACGGGTCTTGAGGGGTTTTTTGCTGAAACCTCAGGCATTTGAGAAGCACAC  
GGTCACACTGCTTCCGGTAGTCAATAAACCGGTAAACCAGCAATAGACATAAGCGGCTATTT  
AACGACCCTGCCCTGAACCGACGACCGGGTCGAATTTGCTTTCGAATTTCTGCCATTCATCCG  
CTTATTATCACTTATTCAGGCGTAGCACCAGGCGTTTAAAGGCACCAATAACTGCCTTAAAA  
AAATTACGCCCCGCCCTGCCACTCATCGCAGTACTGTTGTAATTCATTAAGCATTCTGCCGAC  
ATGGAAGCCATCACAGACGGCATGATGAACCTGAATCGCCAGCGGCATCAGCACCTTGTCGC  
CTTGCGTATAATATTTGCCCATAGTGAAAACGGGGGCGAAGAAGTTGTCCATATTGGCCACG  
TTTAAATCAAACTGGTGAAACTCACCCAGGGATTGGCTGAGACGAAAAACATAATTCTCAAT  
AAACCCTTTAGGGAAATAGGCCAGGTTTTACCGTAACACGCCACATCTTGCGAATATATGT  
GTAGAAACTGCCGAAATCGTCGTGGTATTCACTCCAGAGCGATGAAAACGTTTCAGTTTGC  
TCATGGAAAACGGTGTAACAAGGGTGAACACTATCCCATATCACCAGCTCACCGTCTTTCAT  
TGCCATACGGAACCTCCGGATGAGCATTATCAGGCGGGCAAGAATGTGAATAAAGGCCGGA  
TAAAACCTTGTCCTATTTTTCTTTACGGTCTTTAAAAAGGCCGTAATATCCAGCTGAACGGTC  
TGGTTATAGGTACATTGAGCAACTGACTGAAATGCCTCAAAATGTTCTTTACGATGCCATTGG  
GATATATCAACGGTGGTATATCCAGTGATTTTTTTCTCCATTTTAGCTTCCTTAGCTCCTGAAA  
ATCTCGATAACTCAAAAAATACGCCCGGTAGTGATCTTATTTCAATTATGGTGAAAGTTGGAA  
CCTCTTACGTGCCGATCAACGTCTCATTTTCGCCAAAAGTTGGCCAGGGCTTCCCGGTATCA  
ACAGGGACACCAGGATTTATTTATTCTGCGAAGTGATCTTCCGTCACAGGTATTTATTCGGCG  
CAAAGTGCGTCGGGTGATGCTGCCAACTTACTGATTTAGTGTATGATGGTGTTTTTGAGGTGC  
TCCAGTGGCTTCTGTTTCTATCAGCTGTCCCTCCTGTTACAGCTACTGACGGGGTGGTGCGTAA  
CGGCAAAAGCACCCCGGACATCAGCGCTAGCGGAGTGTATACTGGCTTACTATGTTGGCAC  
TGATGAGGGTGTGAGTGAAGTGCTTCATGTGGCAGGAGAAAAAGGCTGCACCGGTGCGTC  
AGCAGAATATGTGATACAGGATATATCCGCTTCCCTCGCTCACTGACTCGCTACGCTCGGTGC  
TTCGACTGCGGCGAGCGGAAATGGCTTACGAACGGGGCGGAGATTTCTGGAAGATGCCAG  
GAAGATACTTAACAGGGAAGTGAGAGGGCCGCGGCAAGCCGTTTTTCCATAGGCTCCGCC

CCCTGACAAGCATCACGAAATCTGACGCTCAAATCAGTGGTGGCGAAACCCGACAGGACTAT  
AAAGATAACCAGGCGTTTCCCCTGGCGGCTCCCTCGTGCGCTCTCCTGTTCTGCCTTTCGGTTT  
ACCGGTGTCATTCCGCTGTTATGGCCGCGTTTGTCTCATTCCACGCCTGACACTCAGTTCCGG  
GTAGGCAGTTCGCTCCAAGCTGGACTGTATGCACGAACCCCCGTTTCAGTCCGACCGCTGCG  
CCTTATCCGGTAACTATCGTCTTGAGTCCAACCCGGAAAGACATGCAAAAGCACCCTGGCA  
GCAGCCACTGGTAATTGATTTAGAGGAGTTAGTCTTGAAGTCATGCGCCGGTTAAGGCTAAA  
CTGAAAGGACAAGTTTTGGTGACTGCGCTCCTCCAAGCCAGTTACCTCGGTTCAAAGAGTTG  
GTAGCTCAGAGAACCCTTCGAAAAACCGCCCTGCAAGGCGGTTTTTTTCGTTTTTCAGAGCAAGA  
GATTACGCGCAGACCAAAACGATCTCAAGAAGATCATCTTATTAATCAGATAAAAATATTTCT  
AGATTTTCAGTGCAATTTATCTCTTCAAATGTAGCACCTGAAGTCAGCCCCATACGATATAAGT  
TGTAATTCTCATGTTAGTCATGCCCCGCGCCACCGGAAGGAGCTGACTGGGTTGAAGGCTC  
TCAAGGGCATCGGTCGAGATCCCGGTGCCTAATGAGTGAGCTAACTTACATTAATTGCGTTG  
CGCTCACTGCCCCGTTTTCCAGTCGGGAAACCTGTCTGTCGAGCTGCATTAATGAATCGGCCA  
ACGCGCGGGGAGAGGCGGTTTTGCGTATTGGGCGCCAGGGTGGTTTTTTCTTTTCACCAGTGAG  
ACGGGCAACAGCTGATTGCCCTTACCGCCTGGCCCTGAGAGAGTTGCAGCAAGCGGTCCAC  
GCTGGTTTTGCCCCAGCAGGCGAAAATCCTGTTTGATGGTGGTTAACGGCGGGATATAACATG  
AGCTGTCTTCGGTATCGTTCGTATCCCACTACCGAGATGTCCGCACCAACGCGCAGCCCCGGAC  
TCGGTAATGGCGCGCATTGCGCCAGCGCCATCTGATCGTTGGCAACCAGCATCGCAGTGGG  
AACGATGCCCTCATTACGCATTTGCATGGTTTTGTTGAAAACCGGACATGGCACTCCAGTCGCC  
TTCCC GTTCCGCTATCGGCTGAATTTGATTGCGAGTGAGATATTTATGCCAGCCAGCCAGACG  
CAGACGCGCCGAGACAGAACTTAATGGGCCCGCTAACAGCGCGATTTGCTGGTGACCCAATG  
CGACCAGATGCTCCACGCCAGTCGCGTACCGTCTTCATGGGAGAAAATAATACTGTTGATG  
GGTGTCTGGTCAGAGACATCAAGAAATAACGCCGGAACATTAGTGCAGGCAGCTTCCACAGC  
AATGGCATCCTGGTCATCCAGCGGATAGTTAATGATCAGCCCACTGACGCGTTGCGCGAGAA  
GATTGTGCACCGCCGCTTTACAGGCTTCGACGCCGCTTCGTTCTACCATCGACACCACCACGC  
TGGCACCCAGTTGATCGGCGCGAGATTTAATCGCCGCGACAATTTGCGACGGCGCGTGCAGG  
GCCAGACTGGAGGTGGCAACGCCAATCAGCAACGACTGTTTGCCCGCCAGTTGTTGTGCCAC  
GCGGTTGGGAATGTAATTCAGCTCCGCCATCGCCGCTTCCACTTTTTCCCGCGTTTTTCGCAGA  
AACGTGGCTGGCCTGGTTCACCACGCGGGAAACGGTCTGATAAGAGACACCGGCATACTCTG  
CGACATCGTATAACGTTACTGGTTTTACATTCACCACCCTGAATTGACTCTCTTCCGGGCGCT  
ATCATGCCATAACCGCGAAAGGTTTTGCGCCATTCGATGGTGTCCGGGATCTCGACGCTCTCCC  
TTATGCGACTCCTGCATTAGGAAATTAATACGACTCACTATA

q. pDuet::GrpE

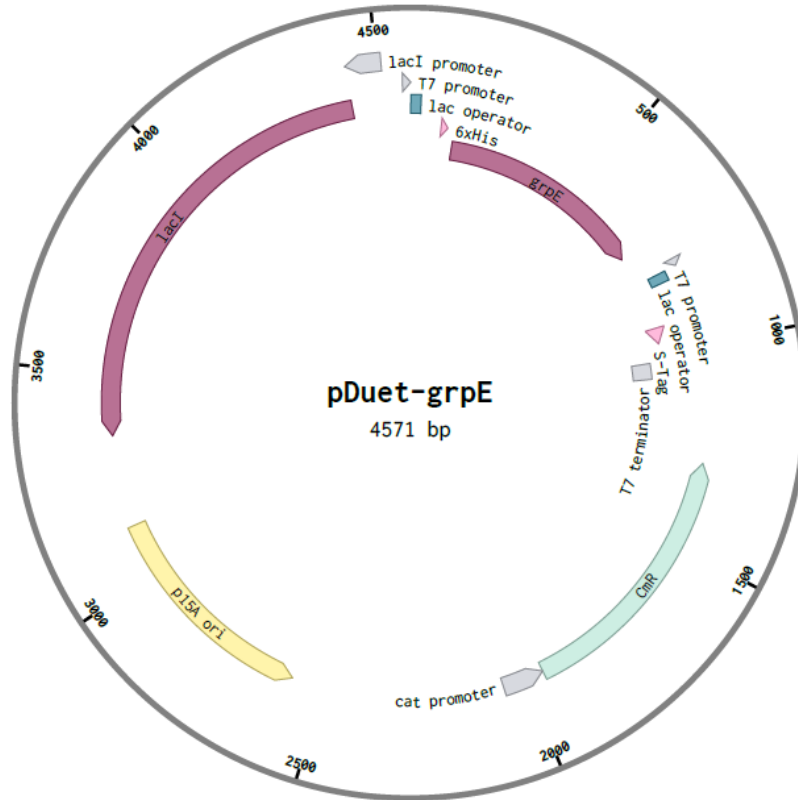

GGGAATTGTGAGCGGATAACAATCCCCTGTAGAAATAATTTTGTTTAACTTTAATAAGGA  
GATATACCATGGGCAGCAGCCATCACCATCATCACCACAGCCAGGATCCGAATTCATGAGTA  
GTAAAGAACAGAAAACGCCTGAGGGGCAAGCCCCGGAAGAAATTATCATGGATCAGCACGA  
AGAGATTGAGGCAGTTGAGCCAGAAGCTTCTGCTGAGCAGGTGGATCCGCGCGATGAAAAA  
GTTGCGAATCTCGAAGCTCAGCTGGCTGAAGCCCAGACCCGTGAACGTGACGGCATTTTGGC  
TGTAAGCCGAAATGGAAAACCTGCGTCGTCGTAAGTGGATATTGAAAAAGCCCACA  
AATTCGCGCTGGAGAAATTCATCAACGAATTGCTGCCGGTGATTGATAGCCTGGATCGTGCG  
CTGGAAGTGGCTGATAAAGCTAACCCGGATATGTCTGCGATGGTTGAAGGCATTGAGCTGAC  
GCTGAAGTCGATGCTGGATGTTGTGCGTAAGTTTGGCGTTGAAGTGATCGCCGAAACTAACG  
TCCCACTGGACCCGAATGTGCATCAGGCCATCGCAATGGTGGAATCTGATGACGTTGCGCCA  
GGTAACGTACTGGGCATTATGCAGAAGGGTTATACGCTGAATGGTCGTACGATTCGTGCGGC  
GATGGTTACTGTAGCGAAAGCAAAGCTTAAGCGGCCGCATAATGCTTAAGTCGAACAGAA  
AGTAATCGTATTGTACACGGCCGCATAATCGAAATTAATACGACTCACTATAGGGGAATTGT  
GAGCGGATAACAATCCCATCTTAGTATATTAGTTAAGTATAAGAAGGAGATATACATATG  
GCAGATCTCAATTGGATATCGGCCGCCACGCGATCGCTGACGTCGGTACCCTCGAGTCTGG  
TAAAGAAACCGCTGCTGCGAAATTTGAACGCCAGCACATGGACTCGTCTACTAGCGCAGCTT



AATTAACCTAGGCTGCTGCCACCGCTGAGCAATAACTAGCATAACCCCTTGGGGCCTCTAAA  
CGGGTCTTGAGGGGTTTTTTGCTGAAACCTCAGGCATTTGAGAAGCACACGGTCACACTGCTT  
CCGGTAGTCAATAAACCGGTAAACCAGCAATAGACATAAGCGGCTATTTAACGACCCTGCC  
TGAACCGACGACCGGGTCGAATTTGCTTTTGAATTTCTGCCATTCATCCGCTTATTATCACTT  
ATTCAGGCGTAGCACCAGGCGTTTAAGGGCACCAATAACTGCCTTAAAAAATTACGCCCCG  
CCCTGCCACTCATCGCAGTACTGTTGTAATTCATTAAGCATTCTGCCGACATGGAAGCCATCA  
CAGACGGCATGATGAACCTGAATCGCCAGCGGCATCAGCACCTTGTCGCCTTGCGTATAATA  
TTTGCCCATAGTGAAAACGGGGGCGAAGAAGTTGTCCATATTGGCCACGTTTAAATCAAAAC  
TGGTGAAACTCACCCAGGGATTGGCTGAGACGAAAAACATATTCTCAATAAACCTTTAGGG  
AAATAGGCCAGGTTTTTACCCTAACACGCCACATCTTGCGAATATATGTGTAGAACTGCCG  
GAAATCGTCGTGGTATTCCTCCAGAGCGATGAAAACGTTTCAGTTTGCTCATGGAAAACGG  
TGTAACAAGGGTGAACACTATCCCATATCACCAGCTCACCGTCTTTCATTGCCATACGGA  
CCGGATGAGCATTTCATCAGGCGGGCAAGAATGTGAATAAAGGCCGGATAAAACTTGTGCTTA  
TTTTCTTTACGGTCTTTAAAAAGGCCGTAATATCCAGCTGAACGGTCTGGTTATAGGTACAT  
TGAGCAACTGACTGAAATGCCTCAAAATGTTCTTTACGATGCCATTGGGATATATCAACGGT  
GGTATATCCAGTGATTTTTTTCTCCATTTTAGCTTCCTTAGCTCCTGAAAATCTCGATAACTCA  
AAAAATACGCCCGGTAGTGATCTTATTTTATTATGGTGAAAGTTGGAACCTCTTACGTGCCGA  
TCAACGTCTCATTTTCGCCAAAAGTTGGCCAGGGCTTCCCGGTATCAACAGGGACACCAGG  
ATTTATTTATTCTGCGAAGTGATCTTCCGTCACAGGTATTTATTCGGCGCAAAGTGCGTCGGG  
TGATGCTGCCAACTTACTGATTTAGTGTATGATGGTGTTTTTGAGGTGCTCCAGTGGCTTCTG  
TTTCTATCAGCTGTCCCTCCTGTTTACGCTACTGACGGGGTGGTGCCTAACGGCAAAGCACCG  
CCGGACATCAGCGCTAGCGGAGTGATACTGGCTTACTATGTTGGCACTGATGAGGGTGTCA  
GTGAAGTGCTTCATGTGGCAGGAGAAAAAAGGCTGCACCGGTGCGTCAGCAGAATATGTGA  
TACAGGATATATTCCGCTTCCCTCGCTCACTGACTCGCTACGCTCGGTCGTTTACTGCGGCGA  
GCGGAAATGGCTTACGAACGGGGCGGAGATTTCTGGAAGATGCCAGGAAGATACTTAACA  
GGGAAGTGAGAGGGCCGCGCAAAGCCGTTTTTCCATAGGCTCCGCCCCCTGACAAGCATC  
ACGAAATCTGACGCTCAAATCAGTGGTGGCGAAACCCGACAGGACTATAAAGATAACCAGGC  
GTTTCCCCTGGCGGCTCCCTCGTGCCTCTCCTGTTTCTGCTTTTCGGTTTACCGGTGTCATTC  
CGCTGTTATGGCCGCGTTTTGTCTCATTCCACGCCTGACACTCAGTTCCGGGTAGGCAGTTCGC  
TCCAAGCTGGACTGTATGCACGAACCCCCGTTTCCAGTCCGACCGCTGCGCCTTATCCGGTAAC  
TATCGTCTTGAGTCCAACCCGAAAGACATGCAAAGCACCACTGGCAGCAGCCACTGGTAA  
TTGATTTAGAGGAGTTAGTCTTGAAGTCATGCGCCGGTTAAGGCTAAACTGAAAGGACAAGT  
TTTGGTACTGCGCTCCTCCAAGCCAGTTACCTCGGTTCAAAGAGTTGGTAGCTCAGAGAAC  
CTTCGAAAAACCGCCCTGCAAGGCGGTTTTTTTCGTTTTTTCAGAGCAAGAGATTACGCGCAGAC

CAAAACGATCTCAAGAAGATCATCTTATTAATCAGATAAAAATATTTCTAGATTTTCAGTGCAAT  
TTATCTCTTCAAATGTAGCACCTGAAGTCAGCCCCATACGATATAAGTTGTAATTCTCATGTT  
AGTCATGCCCCGCGCCACCGGAAGGAGCTGACTGGGTTGAAGGCTCTCAAGGGCATCGGTC  
GAGATCCCGGTGCCTAATGAGTGAGCTAACTTACATTAATTGCGTTGCGCTCACTGCCCGCTT  
TCCAGTCGGGAAACCTGTCGTGCCAGCTGCATTAATGAATCGGCCAACGCGCGGGGAGAGGC  
GGTTTGGCTATTGGGCGCCAGGGTGGTTTTTCTTTTACCAGTGAGACGGGCAACAGCTGATT  
GCCCTTACCGCCTGGCCCTGAGAGAGTTGCAGCAAGCGGTCCACGCTGGTTTGGCCAGCA  
GGCGAAAATCCTGTTTGATGGTGGTTAACGGCGGGATATAACATGAGCTGTCTTCGGTATCG  
TCGTATCCCACTACCGAGATGTCCGCACCAACGCGCAGCCCGGACTCGGTAATGGCGCGCAT  
TGCGCCCAGCGCCATCTGATCGTTGGCAACCAGCATCGCAGTGGGAACGATGCCCTCATTCA  
GCATTTGCATGGTTTGTGAAAACCGGACATGGCACTCCAGTCGCCTTCCCGTTCCGCTATCG  
GCTGAATTTGATTGCGAGTGAGATATTTATGCCAGCCAGCCAGACGCAGACGCGCCGAGACA  
GAACTTAATGGGCCCCGCTAACAGCGCGATTTGCTGGTGACCCAATGCGACCAGATGCTCCAC  
GCCAGTCGCGTACCGTCTTCATGGGAGAAAATAATACTGTTGATGGGTGTCTGGTCAGAGA  
CATCAAGAAATAACGCCGGAACATTAGTGCAGGCAGCTTCCACAGCAATGGCATCCTGGTCA  
TCCAGCGGATAGTTAATGATCAGCCCACTGACGCGTTGCGCGAGAAGATTGTGCACCGCCGC  
TTTACAGGCTTCGACGCCGCTTCGTTCTACCATCGACACCACCGCTGGCACCCAGTTGATC  
GGCGCGAGATTTAATCGCCGCGACAATTTGCGACGGCGCGTGCAGGGCCAGACTGGAGGTG  
GCAACGCCAATCAGCAACGACTGTTTGCCCGCCAGTTGTTGTGCCACGCGGTTGGGAATGTA  
ATTCAGCTCCGCCATCGCCGCTTCCACTTTTTCCCGCGTTTTTCGCAGAAACGTGGCTGGCCTG  
GTTCAACCACGCGGGAAACGGTCTGATAAGAGACACCGGCATACTCTGCGACATCGTATAACG  
TTACTGGTTTCACATTCACCACCCTGAATTGACTCTCTTCCGGGCGCTATCATGCCATACCGC  
GAAAGGTTTTGCGCCATTCGATGGTGTCCGGGATCTCGACGCTCTCCCTTATGCGACTCCTGC  
ATTAGGAAATTAATACGACTCACTATA

r. pDuet::ClpB

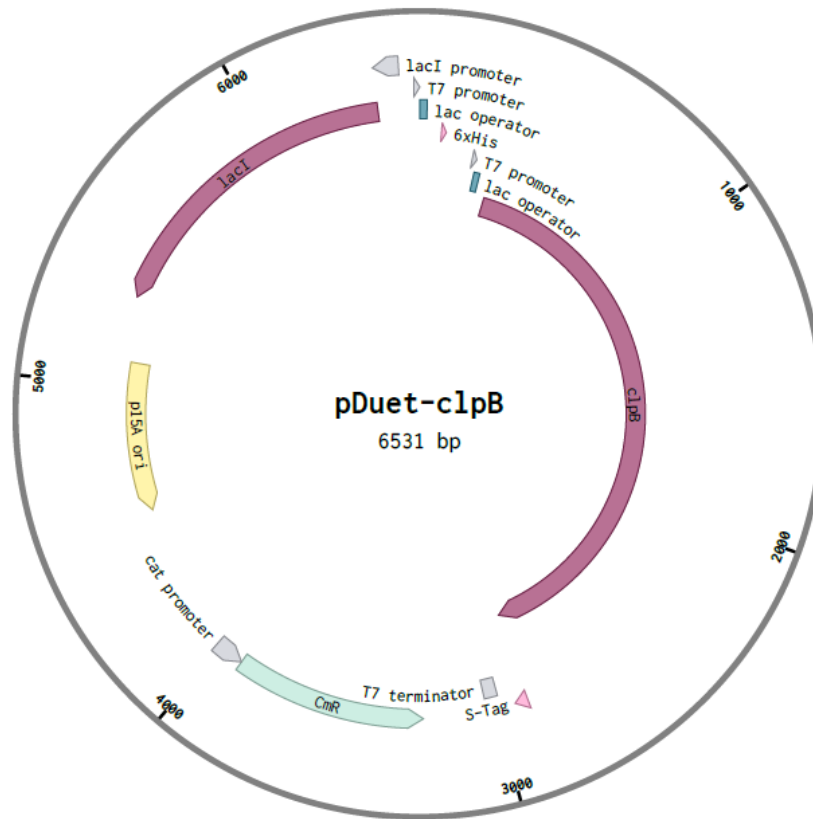

GGGGAATTGTGAGCGGATAACAATCCCCTGTAGAAATAATTTTGTTTAACTTTAATAAGGA  
 GATATACCATGGGCAGCAGCCATCACCATCATCACCACAGCCAGGATCCGAATTCGAGCTCG  
 GCGCGCCTGCAGGTCGACAAGCTTGCGGCCGCATAATGCTTAAGTCGAACAGAAAGTAATCG  
 TATTGTACACGGCCGCATAATCGAAATTAATACGACTCACTATAGGGGAATTGTGAGCGGAT  
 AACAATCCCCATCTTAGTATATTAGTTAAGTATAAGAAGGAGATATACATATGATGCGTCT  
 GGATCGTCTTACTAATAAATTCAGCTTGCTCTTGCCGATGCCCAATCACTTGCACTCGGGCA  
 CGACAACCAATTTATCGAACCACTTCATTTAATGAGCGCCCTGCTGAATCAGGAAGGGGGTT  
 CGGTTAGTCCTTTATTAACATCCGCTGGCATAAATGCTGGCCAGTTGCGCACAGATATCAATC  
 AGGCATTAATCGTTTACCGCAGGTTGAAGGTACTGGTGGTGATGTCCAGCCATCACAGGAT  
 CTGGTGCGGTTCTTAATCTTTGCGACAAGCTGGCGCAAAAACGTGGTGATAACTTTATCTCG  
 TCAGAACTGTTTCGTTCTGGCGGCACTTGAGTCTCGCGGCACGCTGGCCGACATCCTGAAAGC  
 AGCAGGGGCGACCACCGCCAACATTACTCAAGCGATTGAACAAATGCGTGGAGGTGAAAGC  
 GTGAACGATCAAGGTGCTGAAGACCAACGTCAGGCTTTGAAAAAATATACCATCGACCTTAC  
 CGAACGAGCCGAACAGGGCAAACCTCGATCCGGTGATTGGTTCGTGATGAAGAAATTCGCCGT  
 ACCATTCAGGTGCTGCAACGTCGTAATAAAAATAACCCGGTACTGATTGGTGAACCCGGCGT  
 CGGTAAAACCTGCCATCGTTGAAGGTCTGGCGCAGCGTATTATCAACGGCGAAGTGCCGGAAG

GGTTGAAAGGCCGCCGGGTACTGGCGCTGGATATGGGCGCGCTGGTGGCTGGGGCGAAATA  
TCGCGGTGAGTTTGAAGAACGTTTAAAAGGCGTGCTTAACGATCTTGCCAAACAGGAAGGCA  
ACGTCATCCTATTTATCGACGAATTACATACCATGGTCGGCGCGGGTAAAGCCGATGGCGCA  
ATGGACGCCGGAACATGCTGAAACCGGCGCTGGCGCGTGGTGAATTGCACTGCGTAGGTGC  
CACGACGCTTGACGAATATCGCCAGTACATTGAAAAAGATGCTGCGCTGGAACGTCGTTTCC  
AGAAAGTGTGTTGTTGCCGAGCCTTCTGTTGAAGATACCATTGCGATTCTGCGTGGCCTGAAAG  
AACGTTACGAATTGCACCACCATGTGCAAATTACTGACCCGGCAATTGTTGCAGCGGCGACG  
TTGTCTCATCGCTACATTGCTGACCGTCAGCTGCCGGATAAAGCCATCGACCTGATCGATGAA  
GCAGCATCCAGCATTCGTATGCAGATTGACTCAAACCAGAAGAAGCTCGACCGACTCGATCG  
TCGTATCATCCAGCTCAAACCTGGAACAACAGGCGTTAATGAAAGAGTCTGATGAAGCCAGTA  
AAAAACGTCTGGATATGCTCAACGAAGAAGCTGAGCGACAAAGAACGTCAGTACTCCGAGTT  
AGAAGAAGAGTGGAAAGCAGAGAAGGCATCGCTTTCTGGTACGCAGACCATTAAAGCGGAA  
CTGGAACAGGCGAAAATCGCTATTGAACAGGCTCGCCGTGTGGGGGACCTGGCGCGGATGTC  
TGAAGTCAATACGGCAAATCCCGGAACTGGAAAAGCAACTGGAAGCCGCAACGCAGCTC  
GAAGGCAAACCTATGCGTCTGTTGCGTAATAAAGTGACCGACGCCGAAATTGCTGAAGTGCT  
GGCGCGTTGGACGGGGATTCCGGTTTCTCGCATGATGGAAAGCGAGCGCGAAAAACTGCTGC  
GTATGGAGCAAGAAGCTGCACCATCGCGTAATTGGTCAGAACGAAGCGGTTGATGCGGTATCT  
AACGCTATTTCGTCGTAGCCGTGCGGGGCTGGCGGATCCAAATCGCCCGATTGGTTCATTCCCTG  
TTCCCTCGGCCCAACTGGTGTGGGGAAAACAGAGCTTTGTAAGGCGCTGGCGAACTTTATGTT  
TGATAGCGACGAGGCGATGGTCCGTATCGATATGTCCGAGTTTATGGAGAAACACTCGGTGT  
CTCGTTTGGTTGGTGCGCCTCCGGGATATGTCGGTTATGAAGAAGGTGGCTACCTGACCGAA  
GCGGTGCGTCGTCGTCGTTCCGTATTCCGTCATCCTGCTGGATGAAGTGGAAAAAGCGCATCCGGA  
TGTCTTCAACATTCTGTTGCAGGTAAGTGGATGATGGGCGTCTGACTGACGGGCAAGGGAGAA  
CGGTGCACTTCCGTAATACGGTCGTCATTATGACCTCTAACCTCGGTTCCGATCTGATTCAGG  
AACGCTTCGGTGAAGTGGATTATGCGCACATGAAAGAGCTGGTGTCTCGGTGTGGTAAGCCAT  
AACTTCCGTCCGGAATTCATTAACCGTATCGATGAAGTGGTGGTCTTCCATCCGCTGGGTGAA  
CAGCACATTGCCTCGATTGCGCAGATTCAGTTGAAACGTCTGTACAAACGTCTGGAAGAACG  
TGGTTATGAAATCCACATTTCTGACGAGGCGCTGAAACTGCTGAGCGAGAACGGTTACGATC  
CGGTCTATGGTGCACGTCCTCTGAAACGTGCAATTCAGCAGCAGATCGAAAACCCGCTGGCA  
CAGCAAATACTGTCTGGTGAATTGGTTCCGGGTAAAGTGATTTCGCCTGGAAGTTAATGAAGA  
CCGGATTGTCGCCGTCCAGTAACTCGAGTCTGGTAAAGAAACCGCTGCTGCGAAATTTGAAC  
GCCAGCACATGGACTCGTCTACTAGCGCAGCTTAATTAACCTAGGCTGCTGCCACCGCTGAG  
CAATAACTAGCATAACCCCTTGGGGCCTCTAAACGGGTCTTGAGGGGTTTTTTGCTGAAACCT  
CAGGCATTTGAGAAGCACACGGTCCACTGCTTCCGGTAGTCAATAAACCGGTAAACCAGCA

ATAGACATAAGCGGCTATTTAACGACCCTGCCCTGAACCGACGACCGGGTTCGAATTTGCTTT  
CGAATTTCTGCCATTCATCCGCTTATTATCACTTATTCAGGCGTAGCACCAGGCGTTTAAGGG  
CACCAATAACTGCCTTAAAAAAATTACGCCCCGCCCTGCCACTCATCGCAGTACTGTTGTAAT  
TCATTAAGCATTCTGCCGACATGGAAGCCATCACAGACGGCATGATGAACCTGAATCGCCAG  
CGGCATCAGCACCTTGTGCGCTTGCCTATAATATTTGCCCATAGTGAAAACGGGGGCGAAGA  
AGTTGTCCATATTGGCCACGTTTAAATCAAACCTGGTGAAACTCACCCAGGGATTGGCTGAG  
ACGAAAAACATATTCTCAATAAACCTTTAGGGAAATAGGCCAGGTTTTACCGTAACACGC  
CACATCTTGCGAATATATGTGTAGAACTGCCGGAAATCGTCGTGGTATTCACTCCAGAGCG  
ATGAAAACGTTTCAGTTTGCTCATGAAAACGGTGTAACAAGGGTGAACACTATCCCATATC  
ACCAGCTCACCGTCTTTCATTGCCATACGGAACCTCCGGATGAGCATTTCATCAGGCGGGCAAG  
AATGTGAATAAAGGCCGGATAAACTTGTGCTTATTTTTCTTTACGGTCTTTAAAAAGGCCGT  
AATATCCAGCTGAACGGTCTGGTTATAGGTACATTGAGCAACTGACTGAAATGCCTCAAAT  
GTTCTTTACGATGCCATTGGGATATATCAACGGTGGTATATCCAGTGATTTTTTTCTCCATTT  
AGCTTCCTTAGCTCCTGAAAATCTCGATAACTCAAAAAATACGCCCGGTAGTGATCTTATTT  
ATTATGGTGAAAGTTGGAACCTCTTACGTGCCGATCAACGTCTCATTTTTCGCCAAAAGTTGGC  
CCAGGGCTTCCCGGTATCAACAGGGACACCAGGATTTATTTATTCTGCGAAGTGATCTTCCGT  
CACAGGTATTTATTCGGCGCAAAGTGCGTCCGGTGATGCTGCCAACTTACTGATTTAGTGTAT  
GATGGTGTTTTTGAGGTGCTCCAGTGGCTTCTGTTTCTATCAGCTGTCCCTCCTGTTTCAGCTAC  
TGACGGGGTGGTGCCTAACGGCAAAGCACCGCCGGACATCAGCGCTAGCGGAGTGTATAC  
TGGCTTACTATGTTGGCACTGATGAGGGTGTGAGTGAAGTGCTTCATGTGGCAGGAGAAAAA  
AGGCTGCACCGGTGCGTCAGCAGAATATGTGATACAGGATATATTCCGCTTCTCGCTCACT  
GACTCGCTACGCTCGGTGCTTCGACTGCGGCGAGCGGAAATGGCTTACGAACGGGGCGGAG  
ATTTCCCTGGAAGATGCCAGGAAGATACTTAACAGGGAAGTGAGAGGGCCGCGGCAAAGCCG  
TTTTCCATAGGCTCCGCCCCCTGACAAGCATCACGAAATCTGACGCTCAAATCAGTGGTGG  
CGAAACCCGACAGGACTATAAAGATACCAGGCGTTTTCCCTGGCGGCTCCCTCGTGCGCTCT  
CCTGTTCCCTGCCTTTCGGTTTACCGGTGTCATTCCGCTGTTATGGCCGCGTTTGTCTCATTCCA  
CGCCTGACACTCAGTTCGGGTAGGCAGTTCGCTCCAAGCTGGACTGTATGCACGAACCCCC  
CGTTCAGTCCGACCGCTGCGCCTTATCCGGTAACTATCGTCTTGAGTCCAACCCGGAAAGAC  
ATGCAAAGCACCACTGGCAGCAGCCACTGGTAATTGATTTAGAGGAGTTAGTCTTGAAGTC  
ATGCGCCGGTTAAGGCTAAACTGAAAGGACAAGTTTTGGTGACTGCGCTCCTCCAAGCCAGT  
TACCTCGGTTCAAAGAGTTGGTAGCTCAGAGAACCTTCGAAAAACCGCCCTGCAAGGCGGTT  
TTTTCGTTTTTCAGAGCAAGAGATTACGCGCAGACCAAAACGATCTCAAGAAGATCATCTTAT  
TAATCAGATAAAATATTTCTAGATTTCAAGTGAATTTATCTCTTCAAATGTAGCACCTGAAGT  
CAGCCCCATACGATATAAGTTGTAATTTCTCATGTTAGTCATGCCCCGCGCCCACCGGAAGGA

GCTGACTGGGTTGAAGGCTCTCAAGGGCATCGGTTCGAGATCCCGGTGCCTAATGAGTGAGCT  
AACTTACATTAATTGCGTTGCGCTCACTGCCCCGCTTTCCAGTCGGGAAACCTGTCGTGCCAGC  
TGCATTAATGAATCGGCCAACGCGCGGGGAGAGGGCGTTTTCGTATTGGGCGCCAGGGTGGT  
TTTTCTTTTACCAGTGAGACGGGCAACAGCTGATTGCCCTTACCAGCTGGCCCTGAGAGAG  
TTGCAGCAAGCGGTCCACGCTGGTTTGGCCCAGCAGGCGAAAATCCTGTTTGATGGTGGTTA  
ACGGCGGGATATAACATGAGCTGTCTTCGGTATCGTTCGTATCCCACTACCGAGATGTCCGCA  
CCAACGCGCAGCCCGGACTCGGTAATGGCGCGCATTGCGCCCAGCGCCATCTGATCGTTGGC  
AACCAGCATCGCAGTGGGAACGATGCCCTCATTAGCATTTGCATGGTTTGTGAAAACCGG  
ACATGGCACTCCAGTCGCCTTCCCGTTCCGCTATCGGCTGAATTTGATTGCGAGTGAGATATT  
TATGCCAGCCAGCCAGACGCAGACGCGCCGAGACAGAACTTAATGGGCCCGCTAACAGCGC  
GATTTGCTGGTGACCCAATGCGACCAGATGCTCCACGCCAGTCGCGTACCGTCTTCATGGG  
AGAAAATAATACTGTTGATGGGTGTCTGGTCAGAGACATCAAGAAATAACGCCGGAACATTA  
GTGCAGGCAGCTTCCACAGCAATGGCATCCTGGTCATCCAGCGGATAGTTAATGATCAGCCC  
ACTGACGCGTTGCGCGAGAAGATTGTGCACCGCCGCTTTACAGGCTTCGACGCCGCTTCGTTT  
TACCATCGACACCACCAGCTGGCACCCAGTTGATCGGCGCGAGATTTAATCGCCGCGACAA  
TTTGGCAGGGCGCGTGCAGGGCCAGACTGGAGGTGGCAACGCCAATCAGCAACGACTGTTTG  
CCCGCCAGTTGTTGTGCCACGCGGTTGGGAATGTAATTCAGCTCCGCCATCGCCGCTTCCACT  
TTTTCCCGCGTTTTTCGCAGAAACGTGGCTGGCCTGGTTCACCACGCGGGAAACGGTCTGATA  
AGAGACACCGGCATACTCTGCGACATCGTATAACGTTACTGGTTTCACATTCACCACCCTGA  
ATTGACTCTCTTCCGGGCGCTATCATGCCATAACGCGAAAGGTTTTGCGCCATTCGATGGTGT  
CCGGGATCTCGACGCTCTCCCTTATGCGACTCCTGCATTAGGAAATTAATACGACTCACTATA

**3. Non-cropped Western Blots**

**a. Production of rhGALNS in *E. coli* BL21(DE3) using different promoters**

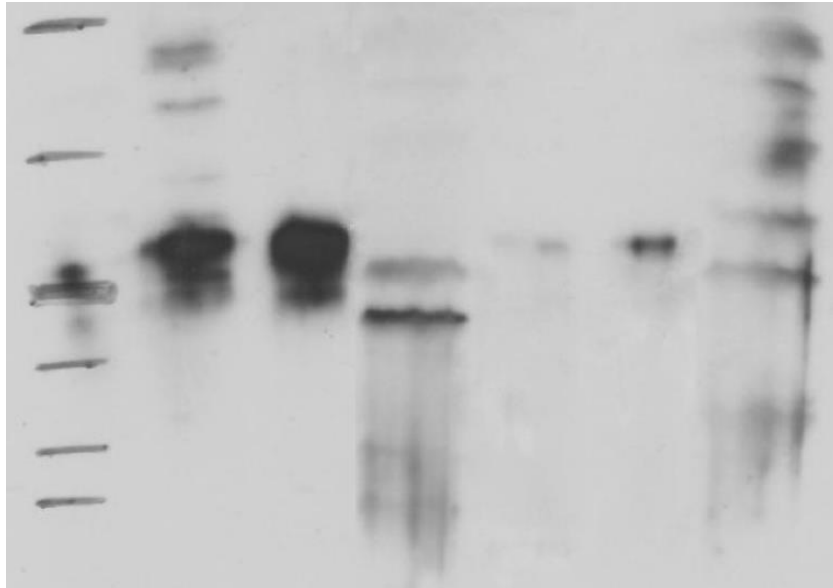

**b. Dynamics of the expression of rhGALNS under the control of the promoter *proU<sub>mod</sub>*.**

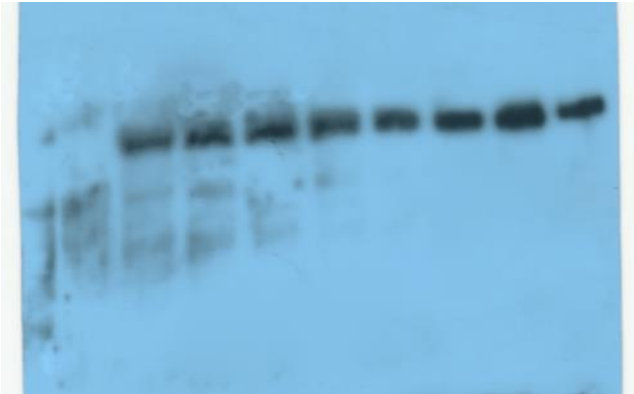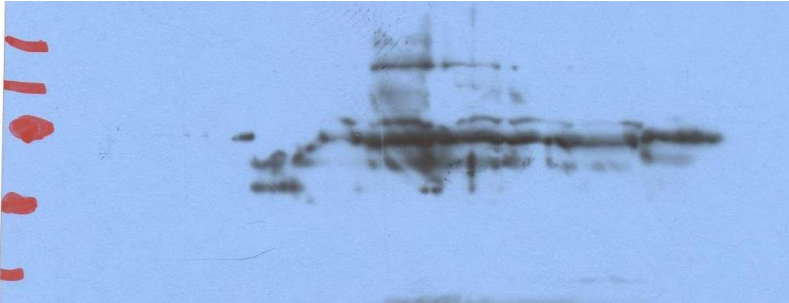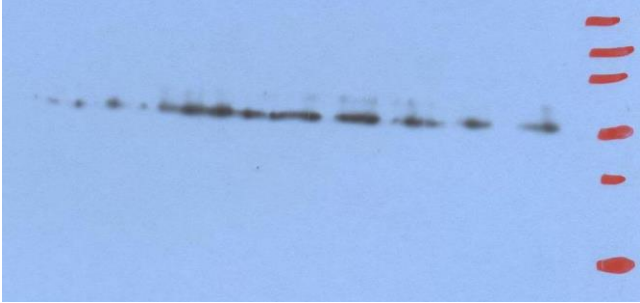



c. Production of rhGALNS using the promoters *tac* and *proU<sub>mod</sub>*, with two different *E. coli* strains: BL21(DE3) and SHuffle®

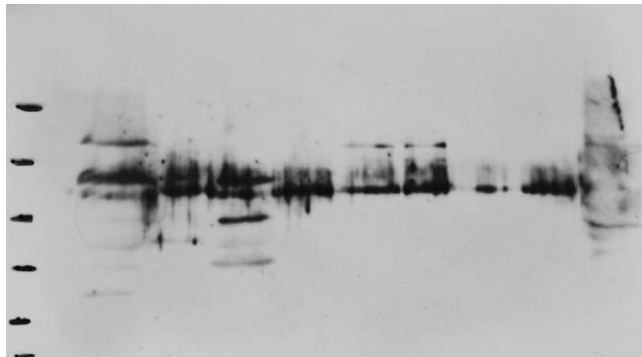

#### 4. Purification via affinity chromatography

Cell lysates were applied to a Glutathione Sepharose 4B with peristaltic pump, under manufacturer instructions (GE Healthcare). In short, the column was equilibrated with approximately ten column volumes of PBS (140 mM NaCl, 2.7 mM KCl, 10 mM Na<sub>2</sub> HPO<sub>4</sub>, 1.8 mM KH<sub>2</sub>PO<sub>4</sub>, pH 7.3). Then, the column was incubated for 1 hour with the sample at room temperature, followed by a washing step with ten column volumes of PBS pH 7.3 until no material appears in the flow-through. Finally, the proteins were eluted with elution buffer (50 mM Tris-HCl, 10 mM reduced glutathione). The pH was continuously increased from pH 8.0. Fractions of 0.5 ml were collected and visualized using a SDS-PAGE.

The following table indicates the protein amounts obtained after each purification step.

|                     | mL | Concentration (mg/mL) | Total protein mg | Bound protein (mg/ml) | Bound protein after washing (mg/ml) | Bound protein after washing + eluted (mg/ml) |
|---------------------|----|-----------------------|------------------|-----------------------|-------------------------------------|----------------------------------------------|
| <b>Protein load</b> | 5  | 24.870                | 124.350          |                       |                                     |                                              |
| <b>Flow-through</b> | 5  | 18.470                | 92.850           | 32.000                | 14.325                              | 15.268                                       |
| <b>Wash</b>         | 50 | 0.354                 | 17.675           |                       |                                     |                                              |
| <b>Eluted</b>       | 25 | 0.034                 | 0.9425           |                       |                                     |                                              |

After the samples were visualized in a SDS-PAGE (Figure shown below), it was evident that the protein fusion was not expressed. Instead, a band corresponding to the GST peptide (26 kDa) was found in the different fractions, prominent in the 20<sup>th</sup> fraction. These samples were tested for enzyme activity but it was not present.

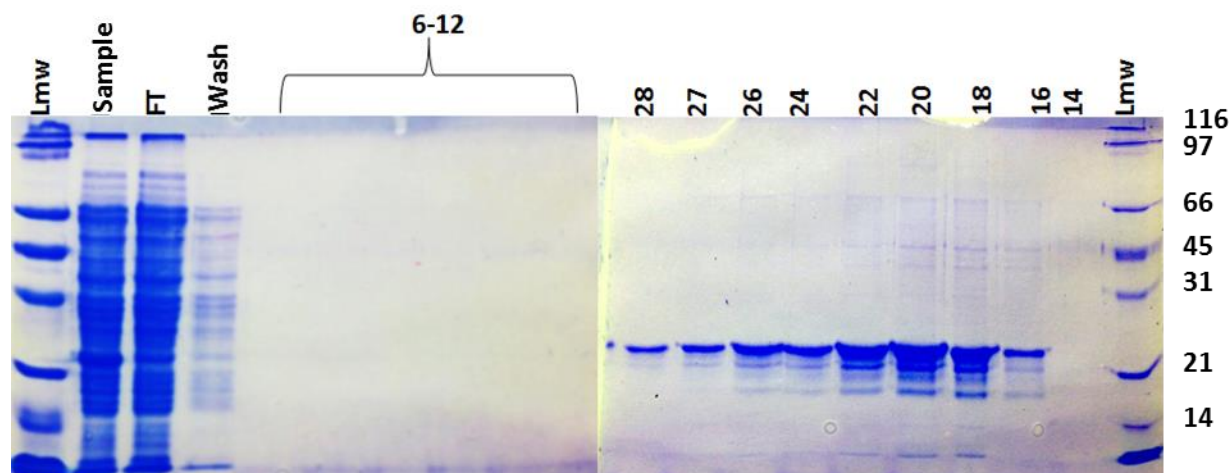

## 5. Indirect Enzyme-Linked Immunosorbent Assay (ELISA)

An indirect ELISA was carried out in order to validate the extracellular amounts rhGALNS, according to the protocol described by Rodriguez *et. al.* 2010. A calibration curve between 0 and 1  $\mu\text{g/ml}$  was created using a recombinant human GALNS enzyme produced in CHO cells (stock concentration of 551  $\mu\text{g/ml}$ ). The samples quantified correspond to culture medium of BL21(DE3)/pGEX-5X-GALNSopt after 24 hours cultivation, exposed to 5% (w/v) sucrose, 0.05N NaCl and absence of osmotic stress.

The results indicate (Figure shown below) that the amounts of rhGALNS in the extracellular fraction were larger when the cells were exposed to osmotic stress, either in the presence of sucrose or sodium chloride, with increments of 349% and 265% of the secreted protein, respectively.

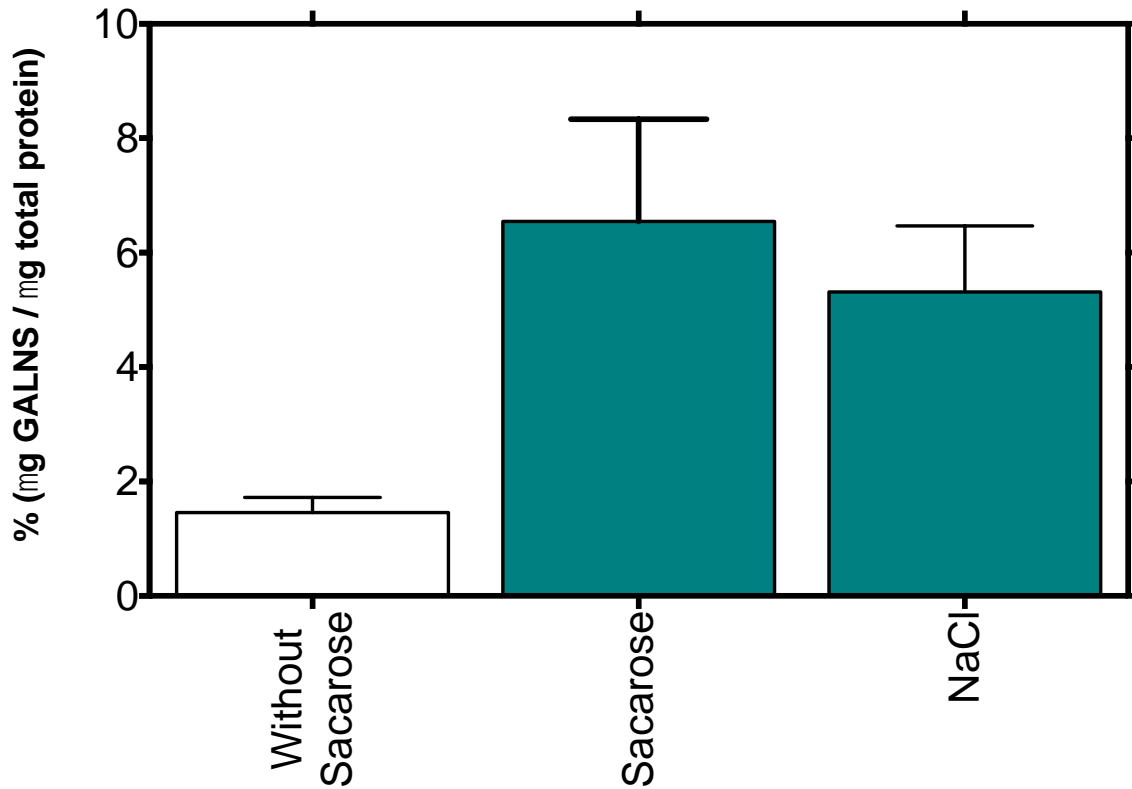

Supplement: 41598_2017_6367_MOESM1_ESM.pdf [file 41598_2017_6367_MOESM1_ESM.pdf]
